# Supplementary material
Source: MDPI journal article supplement (https://www.mdpi.com/1999-4907/14/8/1647)
Supplement: s1 [file s1 › Supplementary Figures.pdf]

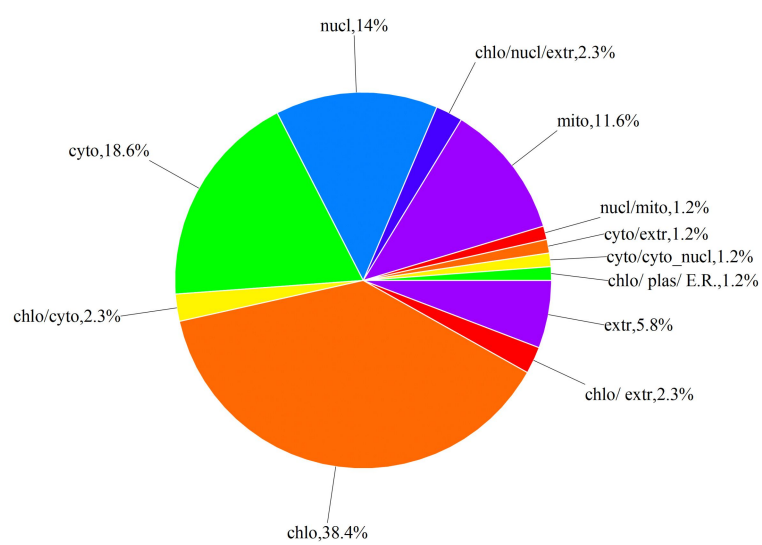

**Figure S1.** Predicted subcellular localization distribution of 86 CsGRX proteins.

A

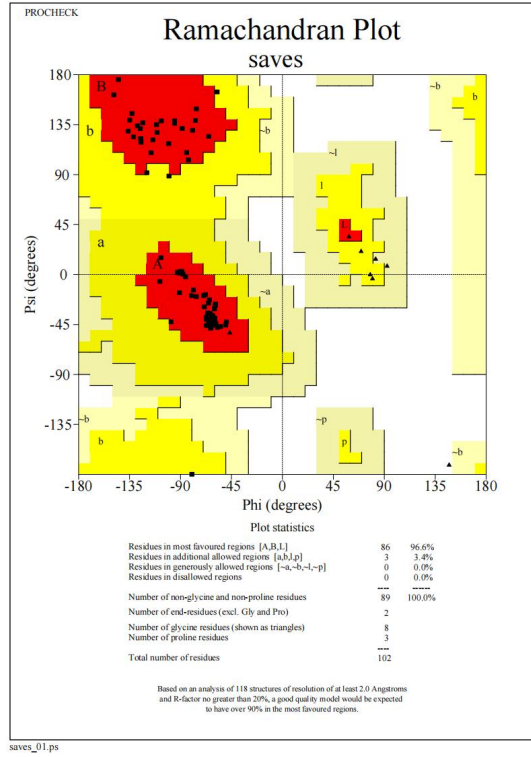

B

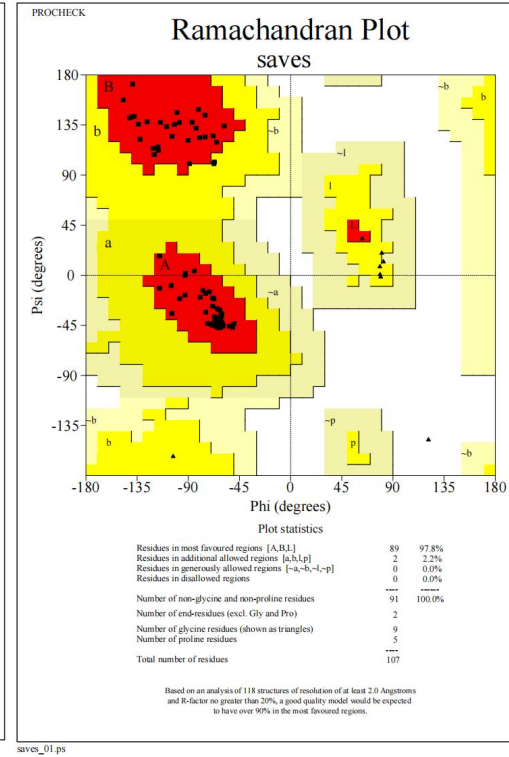

C

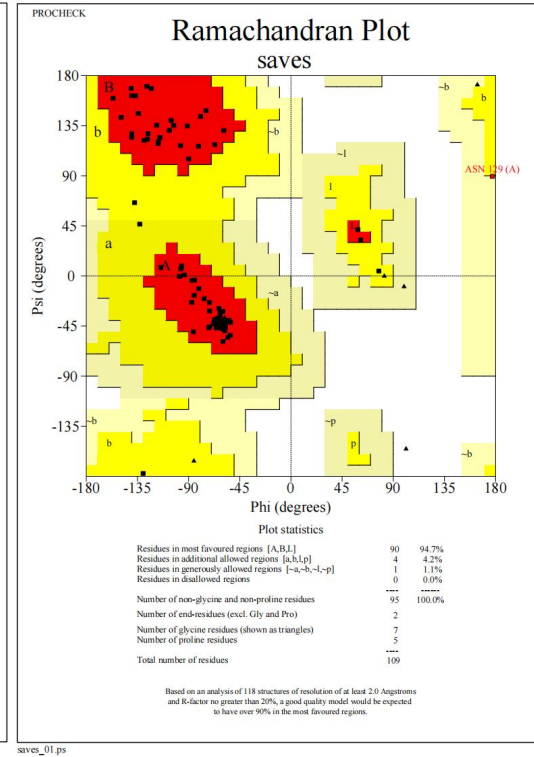

**Figure S2.** Ramachandran Plot of a tertiary structural model of three representative GRX proteins of tea plant. A, B, and C represent the Ramachandran Plot and related parameters of *CsGRX25*, *CsGRX5* and *CsGRX3*, respectively.
