# Supplementary material
Source: MDPI journal article supplement (https://www.mdpi.com/1999-4907/14/8/1647)
Supplement: s1 [file s1 › Table S1.xlsx]

## Sheet: Sheet1
Table S1: Orthologous relationships of GRX genes between Camellia sinensis and seven representative plants (Glycine max, Populus trichocarpa, Vitis vinifera, Arabidopsis thaliana, Solanum tuberosum, Oryza sativa, and Sorghum bicolor)
Camellia sinensis VS Glycine max				Camellia sinensis VS Populus trichocarpa				Camellia sinensis VS Vitis vinifera				Camellia sinensis VS Arabidopsis thaliana				Camellia sinensis VS Solanum tuberosum				Camellia sinensis VS Oryza sativa				Camellia sinensis VS Sorghum bicolor
Chromosome	Gene ID	Chromosome	Gene ID	Chromosome	Gene ID	Chromosome	Gene ID	Chromosome	Gene ID	Chromosome	Gene ID	Chromosome	Gene ID	Chromosome	Gene ID	Chromosome	Gene ID	Chromosome	Gene ID	Chromosome	Gene ID	Chromosome	Gene ID	Chromosome	Gene ID	Chromosome	Gene ID
Cs--Chr1	Cs--CSS0049990.1	Gm--CM000842.4	Gm--rna-gnl|doejgi|Glyma.09G239300.1	Cs--Chr1	Cs--CSS0048558.1	Pt--Chr06	Pt--PtStettler14.06G173900.1.v1.1	Cs--Chr1	Cs--CSS0027383.1	Vv--NC_012010.3	Vv--rna-XM_002273479.3	Cs--Chr2	Cs--CSS0026367.1	At--Chr3	At--AT3G28850.1	Cs--Chr1	Cs--CSS0027383.1	St--Spenn-ch02	St--Sopen02g029330.1	Cs--Chr2	Cs--CSS0026367.1	Os--2	Os--transcript:Os02t0748800-00	Cs--Chr2	Cs--CSS0026367.1	Sb--NC_012873.2	Sb--rna-XM_002452505.2
Cs--Chr1	Cs--CSS0027383.1	Gm--CM000844.4	Gm--rna-gnl|doejgi|Glyma.11G072200.1	Cs--Chr1	Cs--CSS0027383.1	Pt--Chr07	Pt--PtStettler14.07G016500.1.v1.1	Cs--Chr1	Cs--CSS0049990.1	Vv--NC_012020.3	Vv--rna-XM_010662745.2	Cs--Chr2	Cs--CSS0025130.1	At--Chr3	At--AT3G02000.1	Cs--Chr1	Cs--CSS0049990.1	St--Spenn-ch02	St--Sopen02g016540.1	Cs--Chr2	Cs--CSS0025130.1	Os--4	Os--transcript:Os04t0393500-01	Cs--Chr2	Cs--CSS0025130.1	Sb--NC_012875.2	Sb--rna-XM_002446279.2
Cs--Chr1	Cs--CSS0049990.1	Gm--CM000851.4	Gm--rna-gnl|doejgi|Glyma.18G258500.1	Cs--Chr1	Cs--CSS0048558.1	Pt--Chr08	Pt--PtStettler14.08G012400.1.v1.1	Cs--Chr2	Cs--CSS0025130.1	Vv--NC_012007.3	Vv--rna-XM_002264506.3	Cs--Chr2	Cs--CSS0025130.1	At--Chr5	At--AT5G14070.1	Cs--Chr1	Cs--CSS0049990.1	St--Spenn-ch02	St--Sopen02g032570.1	Cs--Chr4	Cs--CSS0038944.1	Os--1	Os--transcript:Os01t0829400-01	Cs--Chr2	Cs--CSS0046074.1	Sb--NC_012879.2	Sb--rna-XM_002437355.2
Cs--Chr1	Cs--CSS0049990.1	Gm--CM000852.4	Gm--rna-gnl|doejgi|Glyma.19G021300.1	Cs--Chr1	Cs--CSS0048558.1	Pt--Chr10	Pt--PtStettler14.10G218900.1.v1.1	Cs--Chr2	Cs--CSS0046074.1	Vv--NC_012017.3	Vv--rna-XM_002266489.3	Cs--Chr2	Cs--CSS0026367.1	At--Chr5	At--AT5G39865.1	Cs--Chr1	Cs--CSS0048558.1	St--Spenn-ch11	St--Sopen11g002330.1	Cs--Chr4	Cs--CSS0032078.1	Os--4	Os--transcript:Os04t0412800-01	Cs--Chr4	Cs--CSS0038944.1	Sb--NC_012872.2	Sb--rna-XM_002456533.2
Cs--Chr2	Cs--CSS0026367.1	Gm--CM000842.4	Gm--rna-gnl|doejgi|Glyma.09G239300.1	Cs--Chr2	Cs--CSS0025130.1	Pt--Chr01	Pt--PtStettler14.01G290200.1.v1.1	Cs--Chr2	Cs--CSS0009163.1	Vv--NC_012020.3	Vv--rna-XM_002278794.3	Cs--Chr2	Cs--CSS0002931.1	At--Chr5	At--AT5G40370.2	Cs--Chr2	Cs--CSS0026367.1	St--Spenn-ch02	St--Sopen02g032570.1	Cs--Chr4	Cs--CSS0038944.1	Os--5	Os--transcript:Os05t0471350-00	Cs--Chr4	Cs--CSS0032078.1	Sb--NC_012875.2	Sb--rna-XM_002446370.2
Cs--Chr2	Cs--CSS0046074.1	Gm--CM000848.3	Gm--rna-gnl|doejgi|Glyma.15G168700.1	Cs--Chr2	Cs--CSS0012888.1	Pt--Chr01	Pt--PtStettler14.01G309200.1.v1.1	Cs--Chr2	Cs--CSS0025130.1	Vv--NC_012020.3	Vv--rna-XM_002272816.3	Cs--Chr4	Cs--CSS0038944.1	At--Chr5	At--AT5G58530.1	Cs--Chr2	Cs--CSS0026367.1	St--Spenn-ch02	St--Sopen02g016540.1	Cs--Chr5	Cs--CSS0041487.1	Os--5	Os--transcript:Os05t0149950-00	Cs--Chr4	Cs--CSS0038944.1	Sb--NC_012878.2	Sb--rna-XM_002439560.2
Cs--Chr2	Cs--CSS0025130.1	Gm--CM000849.3	Gm--rna-gnl|doejgi|Glyma.16G052800.1	Cs--Chr2	Cs--CSS0002931.1	Pt--Chr01	Pt--PtStettler14.01G309200.1.v1.1	Cs--Chr2	Cs--CSS0002931.1	Vv--NC_012020.3	Vv--rna-XM_002276230.3	Cs--Chr4	Cs--CSS0016648.1	At--Chr5	At--AT5G42150.1	Cs--Chr2	Cs--CSS0002931.1	St--Spenn-ch03	St--Sopen03g031850.1	Cs--Chr5	Cs--CSS0023854.1	Os--5	Os--transcript:Os05t0149950-00	Cs--Chr4	Cs--CSS0038944.1	Sb--NC_012878.2	Sb--rna-XM_002441202.2
Cs--Chr2	Cs--CSS0002931.1	Gm--CM000849.3	Gm--rna-gnl|doejgi|Glyma.16G072400.1	Cs--Chr2	Cs--CSS0025130.1	Pt--Chr01	Pt--PtStettler14.01G055500.1.v1.1	Cs--Chr2	Cs--CSS0026367.1	Vv--NC_012020.3	Vv--rna-XM_010662745.2	Cs--Chr5	Cs--CSS0041487.1	At--Chr5	At--AT5G18600.1	Cs--Chr4	Cs--CSS0016648.1	St--Spenn-ch04	St--Sopen04g035370.1	Cs--Chr6	Cs--CSS0045505.1	Os--2	Os--transcript:Os02t0512400-01	Cs--Chr6	Cs--CSS0045505.1	Sb--NC_012873.2	Sb--rna-XM_002452115.2
Cs--Chr2	Cs--CSS0026367.1	Gm--CM000851.4	Gm--rna-gnl|doejgi|Glyma.18G258500.1	Cs--Chr2	Cs--CSS0025130.1	Pt--Chr03	Pt--PtStettler14.03G151200.1.v1.1	Cs--Chr2	Cs--CSS0032266.1	Vv--NC_012020.3	Vv--rna-XM_002278794.3	Cs--Chr7	Cs--CSS0018532.1	At--Chr1	At--AT1G28480.1	Cs--Chr4	Cs--CSS0038944.1	St--Spenn-ch06	St--Sopen06g033550.1	Cs--Chr6	Cs--CSS0045505.1	Os--4	Os--transcript:Os04t0393500-01	Cs--Chr6	Cs--CSS0045505.1	Sb--NC_012875.2	Sb--rna-XM_002446279.2
Cs--Chr2	Cs--CSS0026367.1	Gm--CM000852.4	Gm--rna-gnl|doejgi|Glyma.19G021300.1	Cs--Chr2	Cs--CSS0002931.1	Pt--Chr12	Pt--PtStettler14.12G064900.1.v1.1	Cs--Chr2	Cs--CSS0012888.1	Vv--NC_012020.3	Vv--rna-XM_002276230.3	Cs--Chr8	Cs--CSS0047198.1	At--Chr1	At--AT1G28480.1	Cs--Chr4	Cs--CSS0032078.1	St--Spenn-ch09	St--Sopen09g004620.1	Cs--Chr8	Cs--CSS0047198.1	Os--1	Os--transcript:Os01t0241400-01	Cs--Chr8	Cs--CSS0022827.1	Sb--NC_012870.2	Sb--rna-XM_021450856.1
Cs--Chr2	Cs--CSS0025130.1	Gm--CM000852.4	Gm--rna-gnl|doejgi|Glyma.19G096600.1	Cs--Chr2	Cs--CSS0032266.1	Pt--Chr14	Pt--PtStettler14.14G120000.1.v1.1	Cs--Chr2	Cs--CSS0002931.1	Vv--NC_012023.3	Vv--rna-XM_002282160.4	Cs--Chr8	Cs--CSS0048516.1	At--Chr1	At--AT1G28480.1	Cs--Chr4	Cs--CSS0023185.1	St--Spenn-ch09	St--Sopen09g004580.1	Cs--Chr8	Cs--CSS0022827.1	Os--10	Os--transcript:Os10t0500700-01	Cs--Chr8	Cs--CSS0049641.1	Sb--NC_012870.2	Sb--rna-XM_021450856.1
Cs--Chr4	Cs--CSS0038944.1	Gm--CM000835.4	Gm--rna-gnl|doejgi|Glyma.02G229600.1	Cs--Chr2	Cs--CSS0032266.1	Pt--Chr14	Pt--PtStettler14.14G120000.1.v1.1	Cs--Chr4	Cs--CSS0038944.1	Vv--NC_012012.3	Vv--rna-XM_010652573.2	Cs--Chr9	Cs--CSS0036569.1	At--Chr3	At--AT3G21460.1	Cs--Chr5	Cs--CSS0023854.1	St--Spenn-ch01	St--Sopen01g029370.1	Cs--Chr8	Cs--CSS0049641.1	Os--10	Os--transcript:Os10t0500700-01	Cs--Chr8	Cs--CSS0047198.1	Sb--NC_012872.2	Sb--rna-XM_002458241.2
Cs--Chr4	Cs--CSS0016648.1	Gm--CM000837.4	Gm--rna-gnl|doejgi|Glyma.04G023200.1	Cs--Chr2	Cs--CSS0009163.1	Pt--Chr14	Pt--PtStettler14.14G120000.1.v1.1	Cs--Chr4	Cs--CSS0032078.1	Vv--NC_012014.3	Vv--rna-XM_002276532.3	Cs--Chr9	Cs--CSS0036569.1	At--Chr4	At--AT4G15660.1	Cs--Chr5	Cs--CSS0017711.1	St--Spenn-ch06	St--Sopen06g019640.1	Cs--Chr9	Cs--CSS0013953.1	Os--1	Os--transcript:Os01t0936000-00	Cs--Chr8	Cs--CSS0047198.1	Sb--NC_012878.2	Sb--rna-XM_002440204.2
Cs--Chr4	Cs--CSS0038944.1	Gm--CM000844.4	Gm--rna-gnl|doejgi|Glyma.11G166300.1	Cs--Chr2	Cs--CSS0002931.1	Pt--Chr15	Pt--PtStettler14.15G067900.1.v1.1	Cs--Chr4	Cs--CSS0023185.1	Vv--NC_012014.3	Vv--rna-XM_002282484.4	Cs--Chr9	Cs--CSS0036569.1	At--Chr5	At--AT5G18600.1	Cs--Chr6	Cs--CSS0045505.1	St--Spenn-ch01	St--Sopen01g005430.1	Cs--Chr11	Cs--CSS0026515.1	Os--1	Os--transcript:Os01t0829400-01	Cs--Chr9	Cs--CSS0036569.1	Sb--NC_012877.2	Sb--rna-XM_002488819.2
Cs--Chr4	Cs--CSS0023185.1	Gm--CM000846.3	Gm--rna-gnl|doejgi|Glyma.13G154000.1	Cs--Chr2	Cs--CSS0026367.1	Pt--Chr17	Pt--PtStettler14.17G067800.1.v1.1	Cs--Chr4	Cs--CSS0038944.1	Vv--NC_012019.3	Vv--rna-XM_002276325.3	Cs--Chr10	Cs--CSS0024807.1	At--Chr2	At--AT2G41330.1	Cs--Chr6	Cs--CSS0008671.1	St--Spenn-ch08	St--Sopen08g031460.1	Cs--Chr11	Cs--CSS0019712.1	Os--12	Os--transcript:Os12t0538700-01	Cs--Chr9	Cs--CSS0013953.1	Sb--NC_012877.2	Sb--rna-XM_021446384.1
Cs--Chr4	Cs--CSS0038944.1	Gm--CM000851.4	Gm--rna-gnl|doejgi|Glyma.18G059200.1	Cs--Chr2	Cs--CSS0046074.1	Pt--Chr18	Pt--PtStettler14.18G111700.1.v1.1	Cs--Chr4	Cs--CSS0016648.1	Vv--NC_012024.3	Vv--rna-XM_002271752.3	Cs--Chr10	Cs--CSS0040554.1	At--Chr2	At--AT2G41680.1	Cs--Chr7	Cs--CSS0018532.1	St--Spenn-ch02	St--Sopen02g022470.1	Cs--Chr11	Cs--CSS0026515.1	Os--5	Os--transcript:Os05t0471350-00	Cs--Chr10	Cs--CSS0009561.1	Sb--NC_012874.2	Sb--rna-XM_002450048.2
Cs--Chr5	Cs--CSS0023854.1	Gm--CM000835.4	Gm--rna-gnl|doejgi|Glyma.02G153100.1	Cs--Chr4	Cs--CSS0038944.1	Pt--Chr01	Pt--PtStettler14.01G252100.1.v1.1	Cs--Chr5	Cs--CSS0041487.1	Vv--NC_012011.3	Vv--rna-XM_002275348.3	Cs--Chr10	Cs--CSS0009561.1	At--Chr2	At--AT2G38270.1	Cs--Chr7	Cs--CSS0018532.1	St--Spenn-ch07	St--Sopen07g027500.1	Cs--Chr13	Cs--CSS0026741.1	Os--7	Os--transcript:Os07t0159900-01	Cs--Chr10	Cs--CSS0009561.1	Sb--NC_012877.2	Sb--rna-XM_002442603.2
Cs--Chr5	Cs--CSS0017711.1	Gm--CM000835.4	Gm--rna-gnl|doejgi|Glyma.02G153200.1	Cs--Chr4	Cs--CSS0016648.1	Pt--Chr05	Pt--PtStettler14.05G207000.1.v1.1	Cs--Chr5	Cs--CSS0023854.1	Vv--NC_012011.3	Vv--rna-XM_002275348.3	Cs--Chr10	Cs--CSS0024807.1	At--Chr3	At--AT3G57070.1	Cs--Chr7	Cs--CSS0018532.1	St--Spenn-ch10	St--Sopen10g004020.1					Cs--Chr11	Cs--CSS0026515.1	Sb--NC_012872.2	Sb--rna-XM_002456533.2
Cs--Chr5	Cs--CSS0041487.1	Gm--CM000836.4	Gm--rna-gnl|doejgi|Glyma.03G210200.1	Cs--Chr4	Cs--CSS0032078.1	Pt--Chr06	Pt--PtStettler14.06G183900.1.v1.1	Cs--Chr5	Cs--CSS0023854.1	Vv--NC_012013.3	Vv--rna-XM_002268014.3	Cs--Chr11	Cs--CSS0019712.1	At--Chr2	At--AT2G47880.1	Cs--Chr8	Cs--CSS0049641.1	St--Spenn-ch02	St--Sopen02g023220.1					Cs--Chr11	Cs--CSS0019712.1	Sb--NC_012877.2	Sb--rna-XM_021446384.1
Cs--Chr5	Cs--CSS0017711.1	Gm--CM000836.4	Gm--rna-gnl|doejgi|Glyma.03G210400.1	Cs--Chr4	Cs--CSS0023185.1	Pt--Chr06	Pt--PtStettler14.06G184200.1.v1.1	Cs--Chr6	Cs--CSS0045505.1	Vv--NC_012007.3	Vv--rna-XM_002264506.3	Cs--Chr11	Cs--CSS0019712.1	At--Chr3	At--AT3G62950.1	Cs--Chr8	Cs--CSS0047198.1	St--Spenn-ch02	St--Sopen02g022470.1					Cs--Chr11	Cs--CSS0026515.1	Sb--NC_012878.2	Sb--rna-XM_002441202.2
Cs--Chr5	Cs--CSS0023854.1	Gm--CM000840.4	Gm--rna-gnl|doejgi|Glyma.07G250500.1	Cs--Chr4	Cs--CSS0038944.1	Pt--Chr08	Pt--PtStettler14.08G065000.1.v1.1	Cs--Chr6	Cs--CSS0045505.1	Vv--NC_012020.3	Vv--rna-XM_002272816.3	Cs--Chr11	Cs--CSS0026515.1	At--Chr5	At--AT5G58530.1	Cs--Chr8	Cs--CSS0022827.1	St--Spenn-ch02	St--Sopen02g023220.1					Cs--Chr11	Cs--CSS0026515.1	Sb--NC_012878.2	Sb--rna-XM_002439560.2
Cs--Chr5	Cs--CSS0041487.1	Gm--CM000843.4	Gm--rna-gnl|doejgi|Glyma.10G021200.1	Cs--Chr4	Cs--CSS0038944.1	Pt--Chr09	Pt--PtStettler14.09G065400.1.v1.1	Cs--Chr7	Cs--CSS0018532.1	Vv--NC_012016.3	Vv--rna-XM_002278479.4	Cs--Chr12	Cs--CSS0012730.1	At--Chr1	At--AT1G64500.1	Cs--Chr8	Cs--CSS0048516.1	St--Spenn-ch02	St--Sopen02g022470.1					Cs--Chr13	Cs--CSS0026741.1	Sb--NC_012871.2	Sb--rna-XM_002459320.2
Cs--Chr5	Cs--CSS0017711.1	Gm--CM000843.4	Gm--rna-gnl|doejgi|Glyma.10G021100.1	Cs--Chr4	Cs--CSS0032078.1	Pt--Chr16	Pt--PtStettler14.16G074800.1.v1.1	Cs--Chr7	Cs--CSS0018532.1	Vv--NC_012018.3	Vv--rna-XM_002262637.4	Cs--Chr12	Cs--CSS0002577.1	At--Chr4	At--AT4G33040.1	Cs--Chr8	Cs--CSS0021697.1	St--Spenn-ch02	St--Sopen02g022470.1
Cs--Chr5	Cs--CSS0023854.1	Gm--CM000846.3	Gm--rna-gnl|doejgi|Glyma.13G216200.1	Cs--Chr5	Cs--CSS0023854.1	Pt--Chr08	Pt--PtStettler14.08G192500.1.v1.1	Cs--Chr8	Cs--CSS0022827.1	Vv--NC_012016.3	Vv--rna-XM_010657124.2	Cs--Chr12	Cs--CSS0047503.1	At--Chr4	At--AT4G10630.1	Cs--Chr8	Cs--CSS0047198.1	St--Spenn-ch07	St--Sopen07g027500.1
Cs--Chr5	Cs--CSS0017711.1	Gm--CM000846.3	Gm--rna-gnl|doejgi|Glyma.13G216300.2	Cs--Chr5	Cs--CSS0017711.1	Pt--Chr08	Pt--PtStettler14.08G192300.1.v1.1	Cs--Chr8	Cs--CSS0048516.1	Vv--NC_012016.3	Vv--rna-XM_002278479.4	Cs--Chr12	Cs--CSS0002577.1	At--Chr5	At--AT5G11930.1	Cs--Chr8	Cs--CSS0048516.1	St--Spenn-ch07	St--Sopen07g027500.1
Cs--Chr5	Cs--CSS0041487.1	Gm--CM000848.3	Gm--rna-gnl|doejgi|Glyma.15G096600.1	Cs--Chr5	Cs--CSS0017711.1	Pt--Chr10	Pt--PtStettler14.10G019200.1.v1.1	Cs--Chr8	Cs--CSS0049641.1	Vv--NC_012016.3	Vv--rna-XM_010657124.2	Cs--Chr13	Cs--CSS0005766.1	At--Chr1	At--AT1G03020.1	Cs--Chr8	Cs--CSS0047198.1	St--Spenn-ch10	St--Sopen10g004720.1
Cs--Chr5	Cs--CSS0017711.1	Gm--CM000850.4	Gm--rna-gnl|doejgi|Glyma.17G023900.1	Cs--Chr5	Cs--CSS0000241.1	Pt--Chr10	Pt--PtStettler14.10G019200.1.v1.1	Cs--Chr8	Cs--CSS0047198.1	Vv--NC_012016.3	Vv--rna-XM_002278479.4	Cs--Chr13	Cs--CSS0026288.1	At--Chr2	At--AT2G41330.1	Cs--Chr8	Cs--CSS0048516.1	St--Spenn-ch10	St--Sopen10g004720.1
Cs--Chr6	Cs--CSS0045505.1	Gm--CM000835.4	Gm--rna-gnl|doejgi|Glyma.02G096300.2	Cs--Chr5	Cs--CSS0041487.1	Pt--Chr14	Pt--PtStettler14.14G112600.1.v1.1	Cs--Chr8	Cs--CSS0021697.1	Vv--NC_012016.3	Vv--rna-XM_002278479.4	Cs--Chr13	Cs--CSS0043242.1	At--Chr2	At--AT2G47870.1	Cs--Chr9	Cs--CSS0036569.1	St--Spenn-ch01	St--Sopen01g029370.1
Cs--Chr6	Cs--CSS0008671.1	Gm--CM000848.3	Gm--rna-gnl|doejgi|Glyma.15G236700.1	Cs--Chr5	Cs--CSS0000241.1	Pt--Chr14	Pt--PtStettler14.14G112400.1.v1.1	Cs--Chr8	Cs--CSS0047198.1	Vv--NC_012018.3	Vv--rna-XM_002262637.4	Cs--Chr13	Cs--CSS0014972.1	At--Chr2	At--AT2G47880.1	Cs--Chr9	Cs--CSS0013953.1	St--Spenn-ch06	St--Sopen06g003540.1
Cs--Chr6	Cs--CSS0045505.1	Gm--CM000849.3	Gm--rna-gnl|doejgi|Glyma.16G052800.1	Cs--Chr6	Cs--CSS0045505.1	Pt--Chr01	Pt--PtStettler14.01G290200.1.v1.1	Cs--Chr8	Cs--CSS0021697.1	Vv--NC_012018.3	Vv--rna-XM_002262637.4	Cs--Chr13	Cs--CSS0026288.1	At--Chr3	At--AT3G57070.1	Cs--Chr9	Cs--CSS0036569.1	St--Spenn-ch06	St--Sopen06g019640.1
Cs--Chr6	Cs--CSS0045505.1	Gm--CM000852.4	Gm--rna-gnl|doejgi|Glyma.19G096600.1	Cs--Chr6	Cs--CSS0008671.1	Pt--Chr01	Pt--PtStettler14.01G025000.1.v1.1	Cs--Chr9	Cs--CSS0036569.1	Vv--NC_012011.3	Vv--rna-XM_002275348.3	Cs--Chr13	Cs--CSS0005766.1	At--Chr3	At--AT3G62930.1	Cs--Chr10	Cs--CSS0040554.1	St--Spenn-ch04	St--Sopen04g008040.1
Cs--Chr7	Cs--CSS0018532.1	Gm--CM000839.4	Gm--rna-gnl|doejgi|Glyma.06G287000.1	Cs--Chr6	Cs--CSS0045505.1	Pt--Chr01	Pt--PtStettler14.01G055500.1.v1.1	Cs--Chr9	Cs--CSS0036569.1	Vv--NC_012013.3	Vv--rna-XM_002268014.3	Cs--Chr13	Cs--CSS0014972.1	At--Chr3	At--AT3G62950.1	Cs--Chr10	Cs--CSS0009561.1	St--Spenn-ch09	St--Sopen09g001520.1
Cs--Chr7	Cs--CSS0018532.1	Gm--CM000845.3	Gm--rna-gnl|doejgi|Glyma.12G207400.1	Cs--Chr6	Cs--CSS0045505.1	Pt--Chr03	Pt--PtStettler14.03G151200.1.v1.1	Cs--Chr10	Cs--CSS0009561.1	Vv--NC_012014.3	Vv--rna-XM_002263787.3	Cs--Chr13	Cs--CSS0026741.1	At--Chr5	At--AT5G06470.1	Cs--Chr10	Cs--CSS0040554.1	St--Spenn-ch10	St--Sopen10g030690.1
Cs--Chr7	Cs--CSS0018532.1	Gm--CM000845.3	Gm--rna-gnl|doejgi|Glyma.12G119200.1	Cs--Chr6	Cs--CSS0008671.1	Pt--Chr03	Pt--PtStettler14.03G181800.1.v1.1	Cs--Chr10	Cs--CSS0024807.1	Vv--NC_012014.3	Vv--rna-XM_003632687.3	Cs--Chr14	Cs--CSS0027361.1	At--Chr4	At--AT4G33040.1	Cs--Chr10	Cs--CSS0024807.1	St--Spenn-ch10	St--Sopen10g030200.1
Cs--Chr7	Cs--CSS0018532.1	Gm--CM000846.3	Gm--rna-gnl|doejgi|Glyma.13G293700.1	Cs--Chr7	Cs--CSS0018532.1	Pt--Chr04	Pt--PtStettler14.04G042800.1.v1.1	Cs--Chr10	Cs--CSS0040554.1	Vv--NC_012014.3	Vv--rna-XM_010655464.2	Cs--Chr14	Cs--CSS0027361.1	At--Chr5	At--AT5G11930.1	Cs--Chr11	Cs--CSS0026515.1	St--Spenn-ch06	St--Sopen06g033550.1
Cs--Chr7	Cs--CSS0018532.1	Gm--CM000846.3	Gm--rna-gnl|doejgi|Glyma.13G234500.1	Cs--Chr7	Cs--CSS0018532.1	Pt--Chr07	Pt--PtStettler14.07G125500.1.v1.1	Cs--Chr11	Cs--CSS0026515.1	Vv--NC_012012.3	Vv--rna-XM_010652573.2	Cs--Chr15	Cs--CSS0047807.1	At--Chr5	At--AT5G63030.1	Cs--Chr11	Cs--CSS0014227.1	St--Spenn-ch06	St--Sopen06g033550.1
Cs--Chr7	Cs--CSS0018532.1	Gm--CM000846.3	Gm--rna-gnl|doejgi|Glyma.13G174100.1	Cs--Chr7	Cs--CSS0018532.1	Pt--Chr11	Pt--PtStettler14.11G048100.1.v1.1	Cs--Chr11	Cs--CSS0014227.1	Vv--NC_012012.3	Vv--rna-XM_010652573.2					Cs--Chr11	Cs--CSS0019712.1	St--Spenn-ch09	St--Sopen09g029400.1
Cs--Chr7	Cs--CSS0018532.1	Gm--CM000848.3	Gm--rna-gnl|doejgi|Glyma.15G078600.1	Cs--Chr7	Cs--CSS0018532.1	Pt--Chr17	Pt--PtStettler14.17G012100.1.v1.1	Cs--Chr11	Cs--CSS0019712.1	Vv--NC_012013.3	Vv--rna-XM_002268014.3					Cs--Chr12	Cs--CSS0012730.1	St--Spenn-ch08	St--Sopen08g030840.1
Cs--Chr8	Cs--CSS0047198.1	Gm--CM000839.4	Gm--rna-gnl|doejgi|Glyma.06G287000.1	Cs--Chr8	Cs--CSS0022827.1	Pt--Chr04	Pt--PtStettler14.04G035700.1.v1.1	Cs--Chr11	Cs--CSS0026515.1	Vv--NC_012019.3	Vv--rna-XM_002276325.3					Cs--Chr12	Cs--CSS0047503.1	St--Spenn-ch08	St--Sopen08g031460.1
Cs--Chr8	Cs--CSS0048516.1	Gm--CM000839.4	Gm--rna-gnl|doejgi|Glyma.06G287000.1	Cs--Chr8	Cs--CSS0048516.1	Pt--Chr04	Pt--PtStettler14.04G042800.1.v1.1	Cs--Chr11	Cs--CSS0014227.1	Vv--NC_012019.3	Vv--rna-XM_002276325.3					Cs--Chr12	Cs--CSS0015651.1	St--Spenn-ch08	St--Sopen08g030840.1
Cs--Chr8	Cs--CSS0047198.1	Gm--CM000845.3	Gm--rna-gnl|doejgi|Glyma.12G207400.1	Cs--Chr8	Cs--CSS0049641.1	Pt--Chr04	Pt--PtStettler14.04G035700.1.v1.1	Cs--Chr11	Cs--CSS0019712.1	Vv--NC_012020.3	Vv--rna-XM_002272816.3					Cs--Chr12	Cs--CSS0002577.1	St--Spenn-ch08	St--Sopen08g018550.1
Cs--Chr8	Cs--CSS0048516.1	Gm--CM000845.3	Gm--rna-gnl|doejgi|Glyma.12G119200.1	Cs--Chr8	Cs--CSS0047198.1	Pt--Chr04	Pt--PtStettler14.04G042800.1.v1.1	Cs--Chr12	Cs--CSS0012730.1	Vv--NC_012008.3	Vv--rna-XM_002266869.4					Cs--Chr12	Cs--CSS0041979.1	St--Spenn-ch08	St--Sopen08g031460.1
Cs--Chr8	Cs--CSS0048516.1	Gm--CM000845.3	Gm--rna-gnl|doejgi|Glyma.12G207400.1	Cs--Chr8	Cs--CSS0021697.1	Pt--Chr04	Pt--PtStettler14.04G042800.1.v1.1	Cs--Chr12	Cs--CSS0047503.1	Vv--NC_012008.3	Vv--rna-XM_002272420.3					Cs--Chr12	Cs--CSS0002577.1	St--Spenn-ch11	St--Sopen11g028620.1
Cs--Chr8	Cs--CSS0047198.1	Gm--CM000845.3	Gm--rna-gnl|doejgi|Glyma.12G119200.1	Cs--Chr8	Cs--CSS0047198.1	Pt--Chr07	Pt--PtStettler14.07G125500.1.v1.1	Cs--Chr12	Cs--CSS0015651.1	Vv--NC_012008.3	Vv--rna-XM_002266869.4					Cs--Chr13	Cs--CSS0014972.1	St--Spenn-ch06	St--Sopen06g003540.1
Cs--Chr8	Cs--CSS0048516.1	Gm--CM000846.3	Gm--rna-gnl|doejgi|Glyma.13G234500.1	Cs--Chr8	Cs--CSS0021697.1	Pt--Chr07	Pt--PtStettler14.07G125500.1.v1.1	Cs--Chr12	Cs--CSS0041979.1	Vv--NC_012008.3	Vv--rna-XM_002272420.3					Cs--Chr13	Cs--CSS0014972.1	St--Spenn-ch09	St--Sopen09g029400.1
Cs--Chr8	Cs--CSS0022827.1	Gm--CM000846.3	Gm--rna-gnl|doejgi|Glyma.13G180400.1	Cs--Chr8	Cs--CSS0022827.1	Pt--Chr11	Pt--PtStettler14.11G042200.1.v1.1	Cs--Chr12	Cs--CSS0002577.1	Vv--NC_012010.3	Vv--rna-XM_002278616.4					Cs--Chr13	Cs--CSS0038141.1	St--Spenn-ch09	St--Sopen09g029470.1
Cs--Chr8	Cs--CSS0048516.1	Gm--CM000846.3	Gm--rna-gnl|doejgi|Glyma.13G174100.1	Cs--Chr8	Cs--CSS0048516.1	Pt--Chr11	Pt--PtStettler14.11G048100.1.v1.1	Cs--Chr13	Cs--CSS0014972.1	Vv--NC_012013.3	Vv--rna-XM_002268014.3					Cs--Chr13	Cs--CSS0026288.1	St--Spenn-ch10	St--Sopen10g030200.1
Cs--Chr8	Cs--CSS0047198.1	Gm--CM000846.3	Gm--rna-gnl|doejgi|Glyma.13G234500.1	Cs--Chr8	Cs--CSS0049641.1	Pt--Chr11	Pt--PtStettler14.11G042200.1.v1.1	Cs--Chr13	Cs--CSS0026288.1	Vv--NC_012014.3	Vv--rna-XM_003632687.3					Cs--Chr14	Cs--CSS0027361.1	St--Spenn-ch08	St--Sopen08g018550.1
Cs--Chr8	Cs--CSS0049641.1	Gm--CM000846.3	Gm--rna-gnl|doejgi|Glyma.13G180400.1	Cs--Chr8	Cs--CSS0047198.1	Pt--Chr11	Pt--PtStettler14.11G048100.1.v1.1	Cs--Chr14	Cs--CSS0027361.1	Vv--NC_012010.3	Vv--rna-XM_002278616.4					Cs--Chr15	Cs--CSS0047807.1	St--Spenn-ch03	St--Sopen03g031850.1
Cs--Chr8	Cs--CSS0047198.1	Gm--CM000846.3	Gm--rna-gnl|doejgi|Glyma.13G174100.1	Cs--Chr8	Cs--CSS0021697.1	Pt--Chr11	Pt--PtStettler14.11G048100.1.v1.1	Cs--Chr15	Cs--CSS0047807.1	Vv--NC_012020.3	Vv--rna-XM_002276230.3
Cs--Chr8	Cs--CSS0047198.1	Gm--CM000846.3	Gm--rna-gnl|doejgi|Glyma.13G293700.1	Cs--Chr8	Cs--CSS0047198.1	Pt--Chr17	Pt--PtStettler14.17G012100.1.v1.1	Cs--Chr15	Cs--CSS0013276.1	Vv--NC_012023.3	Vv--rna-XM_002282477.3
Cs--Chr8	Cs--CSS0048516.1	Gm--CM000846.3	Gm--rna-gnl|doejgi|Glyma.13G293700.1	Cs--Chr8	Cs--CSS0021697.1	Pt--Chr17	Pt--PtStettler14.17G012100.1.v1.1	Cs--Chr15	Cs--CSS0047807.1	Vv--NC_012023.3	Vv--rna-XM_002282160.4
Cs--Chr8	Cs--CSS0021697.1	Gm--CM000846.3	Gm--rna-gnl|doejgi|Glyma.13G234500.1	Cs--Chr9	Cs--CSS0036569.1	Pt--Chr08	Pt--PtStettler14.08G192300.1.v1.1
Cs--Chr8	Cs--CSS0047198.1	Gm--CM000848.3	Gm--rna-gnl|doejgi|Glyma.15G078600.1	Cs--Chr9	Cs--CSS0013953.1	Pt--Chr08	Pt--PtStettler14.08G192400.1.v1.1
Cs--Chr8	Cs--CSS0048516.1	Gm--CM000848.3	Gm--rna-gnl|doejgi|Glyma.15G078600.1	Cs--Chr9	Cs--CSS0036569.1	Pt--Chr10	Pt--PtStettler14.10G019200.1.v1.1
Cs--Chr9	Cs--CSS0036569.1	Gm--CM000835.4	Gm--rna-gnl|doejgi|Glyma.02G153200.1	Cs--Chr9	Cs--CSS0036569.1	Pt--Chr14	Pt--PtStettler14.14G112400.1.v1.1
Cs--Chr9	Cs--CSS0013953.1	Gm--CM000835.4	Gm--rna-gnl|doejgi|Glyma.02G153100.1	Cs--Chr9	Cs--CSS0013953.1	Pt--Chr14	Pt--PtStettler14.14G112600.1.v1.1
Cs--Chr9	Cs--CSS0036569.1	Gm--CM000836.4	Gm--rna-gnl|doejgi|Glyma.03G210400.1	Cs--Chr10	Cs--CSS0024807.1	Pt--Chr06	Pt--PtStettler14.06G034300.1.v1.1
Cs--Chr9	Cs--CSS0013953.1	Gm--CM000836.4	Gm--rna-gnl|doejgi|Glyma.03G210200.1	Cs--Chr10	Cs--CSS0040554.1	Pt--Chr06	Pt--PtStettler14.06G041300.1.v1.1
Cs--Chr9	Cs--CSS0036569.1	Gm--CM000840.4	Gm--rna-gnl|doejgi|Glyma.07G250500.1	Cs--Chr10	Cs--CSS0024807.1	Pt--Chr16	Pt--PtStettler14.16G035200.1.v1.1
Cs--Chr9	Cs--CSS0036569.1	Gm--CM000846.3	Gm--rna-gnl|doejgi|Glyma.13G216200.1	Cs--Chr11	Cs--CSS0026515.1	Pt--Chr01	Pt--PtStettler14.01G252100.1.v1.1
Cs--Chr9	Cs--CSS0036569.1	Gm--CM000848.3	Gm--rna-gnl|doejgi|Glyma.15G096600.1	Cs--Chr11	Cs--CSS0014227.1	Pt--Chr01	Pt--PtStettler14.01G252100.1.v1.1
Cs--Chr9	Cs--CSS0036569.1	Gm--CM000850.4	Gm--rna-gnl|doejgi|Glyma.17G023900.1	Cs--Chr11	Cs--CSS0026515.1	Pt--Chr08	Pt--PtStettler14.08G065000.1.v1.1
Cs--Chr9	Cs--CSS0036569.1	Gm--CM000852.4	Gm--rna-gnl|doejgi|Glyma.19G207600.1	Cs--Chr11	Cs--CSS0014227.1	Pt--Chr08	Pt--PtStettler14.08G065000.1.v1.1
Cs--Chr9	Cs--CSS0013953.1	Gm--CM000852.4	Gm--rna-gnl|doejgi|Glyma.19G207400.1	Cs--Chr11	Cs--CSS0026515.1	Pt--Chr09	Pt--PtStettler14.09G065400.1.v1.1
Cs--Chr10	Cs--CSS0009561.1	Gm--CM000834.4	Gm--rna-gnl|doejgi|Glyma.01G119900.1	Cs--Chr11	Cs--CSS0014227.1	Pt--Chr09	Pt--PtStettler14.09G065400.1.v1.1
Cs--Chr10	Cs--CSS0040554.1	Gm--CM000835.4	Gm--rna-gnl|doejgi|Glyma.02G185300.5	Cs--Chr11	Cs--CSS0019712.1	Pt--Chr14	Pt--PtStettler14.14G112700.1.v1.1
Cs--Chr10	Cs--CSS0009561.1	Gm--CM000836.4	Gm--rna-gnl|doejgi|Glyma.03G056300.1	Cs--Chr12	Cs--CSS0015651.1	Pt--Chr01	Pt--PtStettler14.01G079600.1.v1.1
Cs--Chr10	Cs--CSS0024807.1	Gm--CM000836.4	Gm--rna-gnl|doejgi|Glyma.03G129600.1	Cs--Chr12	Cs--CSS0012730.1	Pt--Chr01	Pt--PtStettler14.01G079600.1.v1.1
Cs--Chr10	Cs--CSS0017181.1	Gm--CM000844.4	Gm--rna-gnl|doejgi|Glyma.11G232300.1	Cs--Chr12	Cs--CSS0012730.1	Pt--Chr03	Pt--PtStettler14.03G128700.1.v1.1
Cs--Chr10	Cs--CSS0024807.1	Gm--CM000852.4	Gm--rna-gnl|doejgi|Glyma.19G131800.1	Cs--Chr12	Cs--CSS0015651.1	Pt--Chr03	Pt--PtStettler14.03G128700.1.v1.1
Cs--Chr11	Cs--CSS0019712.1	Gm--CM000835.4	Gm--rna-gnl|doejgi|Glyma.02G153000.1	Cs--Chr12	Cs--CSS0002577.1	Pt--Chr06	Pt--PtStettler14.06G197600.1.v1.1
Cs--Chr11	Cs--CSS0014227.1	Gm--CM000835.4	Gm--rna-gnl|doejgi|Glyma.02G229600.1	Cs--Chr13	Cs--CSS0026288.1	Pt--Chr01	Pt--PtStettler14.01G025000.1.v1.1
Cs--Chr11	Cs--CSS0026515.1	Gm--CM000835.4	Gm--rna-gnl|doejgi|Glyma.02G229600.1	Cs--Chr13	Cs--CSS0014972.1	Pt--Chr02	Pt--PtStettler14.02G191000.1.v1.1
Cs--Chr11	Cs--CSS0019712.1	Gm--CM000836.4	Gm--rna-gnl|doejgi|Glyma.03G210100.2	Cs--Chr13	Cs--CSS0043242.1	Pt--Chr02	Pt--PtStettler14.02G190900.1.v1.1
Cs--Chr11	Cs--CSS0019712.1	Gm--CM000843.4	Gm--rna-gnl|doejgi|Glyma.10G021300.1	Cs--Chr13	Cs--CSS0038141.1	Pt--Chr02	Pt--PtStettler14.02G190500.1.v1.1
Cs--Chr11	Cs--CSS0026515.1	Gm--CM000844.4	Gm--rna-gnl|doejgi|Glyma.11G232300.1	Cs--Chr13	Cs--CSS0026741.1	Pt--Chr06	Pt--PtStettler14.06G173900.1.v1.1
Cs--Chr11	Cs--CSS0026515.1	Gm--CM000844.4	Gm--rna-gnl|doejgi|Glyma.11G166300.1	Cs--Chr13	Cs--CSS0026288.1	Pt--Chr06	Pt--PtStettler14.06G034300.1.v1.1
Cs--Chr11	Cs--CSS0014227.1	Gm--CM000844.4	Gm--rna-gnl|doejgi|Glyma.11G166300.1	Cs--Chr13	Cs--CSS0026741.1	Pt--Chr08	Pt--PtStettler14.08G012400.1.v1.1
Cs--Chr11	Cs--CSS0026515.1	Gm--CM000847.3	Gm--rna-gnl|doejgi|Glyma.14G196900.1	Cs--Chr13	Cs--CSS0014972.1	Pt--Chr14	Pt--PtStettler14.14G112700.1.v1.1
Cs--Chr11	Cs--CSS0026515.1	Gm--CM000847.3	Gm--rna-gnl|doejgi|Glyma.14G057300.1	Cs--Chr13	Cs--CSS0043242.1	Pt--Chr14	Pt--PtStettler14.14G112600.1.v1.1
Cs--Chr11	Cs--CSS0026515.1	Gm--CM000851.4	Gm--rna-gnl|doejgi|Glyma.18G059200.1	Cs--Chr13	Cs--CSS0038141.1	Pt--Chr14	Pt--PtStettler14.14G112100.1.v1.1
Cs--Chr11	Cs--CSS0026515.1	Gm--CM000851.4	Gm--rna-gnl|doejgi|Glyma.18G025000.1	Cs--Chr13	Cs--CSS0026741.1	Pt--Chr16	Pt--PtStettler14.16G064100.1.v1.1
Cs--Chr11	Cs--CSS0019712.1	Gm--CM000852.4	Gm--rna-gnl|doejgi|Glyma.19G207300.2	Cs--Chr13	Cs--CSS0026288.1	Pt--Chr16	Pt--PtStettler14.16G035200.1.v1.1
Cs--Chr12	Cs--CSS0002577.1	Gm--CM000837.4	Gm--rna-gnl|doejgi|Glyma.04G051900.2	Cs--Chr14	Cs--CSS0027361.1	Pt--Chr06	Pt--PtStettler14.06G197600.1.v1.1
Cs--Chr12	Cs--CSS0012730.1	Gm--CM000838.3	Gm--rna-gnl|doejgi|Glyma.05G218400.1	Cs--Chr15	Cs--CSS0047807.1	Pt--Chr12	Pt--PtStettler14.12G064900.1.v1.1
Cs--Chr12	Cs--CSS0015651.1	Gm--CM000838.3	Gm--rna-gnl|doejgi|Glyma.05G218400.1	Cs--Chr15	Cs--CSS0013276.1	Pt--Chr12	Pt--PtStettler14.12G035000.1.v1.1
Cs--Chr12	Cs--CSS0002577.1	Gm--CM000839.4	Gm--rna-gnl|doejgi|Glyma.06G052600.2	Cs--Chr15	Cs--CSS0047807.1	Pt--Chr15	Pt--PtStettler14.15G067900.1.v1.1
Cs--Chr12	Cs--CSS0002577.1	Gm--CM000847.3	Gm--rna-gnl|doejgi|Glyma.14G096700.1	Cs--Chr15	Cs--CSS0013276.1	Pt--Chr15	Pt--PtStettler14.15G034000.1.v1.1
Cs--Chr12	Cs--CSS0002577.1	Gm--CM000850.4	Gm--rna-gnl|doejgi|Glyma.17G227700.1
Cs--Chr13	Cs--CSS0014972.1	Gm--CM000835.4	Gm--rna-gnl|doejgi|Glyma.02G153000.1
Cs--Chr13	Cs--CSS0043242.1	Gm--CM000835.4	Gm--rna-gnl|doejgi|Glyma.02G153100.1
Cs--Chr13	Cs--CSS0005766.1	Gm--CM000835.4	Gm--rna-gnl|doejgi|Glyma.02G153200.1
Cs--Chr13	Cs--CSS0026741.1	Gm--CM000835.4	Gm--rna-gnl|doejgi|Glyma.02G193800.2
Cs--Chr13	Cs--CSS0014972.1	Gm--CM000836.4	Gm--rna-gnl|doejgi|Glyma.03G210100.2
Cs--Chr13	Cs--CSS0043242.1	Gm--CM000836.4	Gm--rna-gnl|doejgi|Glyma.03G210200.1
Cs--Chr13	Cs--CSS0038141.1	Gm--CM000836.4	Gm--rna-gnl|doejgi|Glyma.03G210400.1
Cs--Chr13	Cs--CSS0026288.1	Gm--CM000836.4	Gm--rna-gnl|doejgi|Glyma.03G129600.1
Cs--Chr13	Cs--CSS0026741.1	Gm--CM000836.4	Gm--rna-gnl|doejgi|Glyma.03G203500.1
Cs--Chr13	Cs--CSS0043242.1	Gm--CM000840.4	Gm--rna-gnl|doejgi|Glyma.07G250600.1
Cs--Chr13	Cs--CSS0014972.1	Gm--CM000843.4	Gm--rna-gnl|doejgi|Glyma.10G021300.1
Cs--Chr13	Cs--CSS0043242.1	Gm--CM000843.4	Gm--rna-gnl|doejgi|Glyma.10G021200.1
Cs--Chr13	Cs--CSS0005766.1	Gm--CM000843.4	Gm--rna-gnl|doejgi|Glyma.10G021100.1
Cs--Chr13	Cs--CSS0043621.1	Gm--CM000843.4	Gm--rna-gnl|doejgi|Glyma.10G020900.1
Cs--Chr13	Cs--CSS0026741.1	Gm--CM000843.4	Gm--rna-gnl|doejgi|Glyma.10G083400.1
Cs--Chr13	Cs--CSS0014972.1	Gm--CM000850.4	Gm--rna-gnl|doejgi|Glyma.17G023900.1
Cs--Chr13	Cs--CSS0014972.1	Gm--CM000852.4	Gm--rna-gnl|doejgi|Glyma.19G207300.2
Cs--Chr13	Cs--CSS0005766.1	Gm--CM000852.4	Gm--rna-gnl|doejgi|Glyma.19G207600.1
Cs--Chr13	Cs--CSS0048300.1	Gm--CM000852.4	Gm--rna-gnl|doejgi|Glyma.19G207700.1
Cs--Chr13	Cs--CSS0026288.1	Gm--CM000852.4	Gm--rna-gnl|doejgi|Glyma.19G131800.1
Cs--Chr13	Cs--CSS0026741.1	Gm--CM000852.4	Gm--rna-gnl|doejgi|Glyma.19G200900.1
Cs--Chr14	Cs--CSS0027361.1	Gm--CM000837.4	Gm--rna-gnl|doejgi|Glyma.04G051900.2
Cs--Chr14	Cs--CSS0027361.1	Gm--CM000839.4	Gm--rna-gnl|doejgi|Glyma.06G052600.2
Cs--Chr14	Cs--CSS0027361.1	Gm--CM000847.3	Gm--rna-gnl|doejgi|Glyma.14G096700.1
Cs--Chr14	Cs--CSS0027361.1	Gm--CM000850.4	Gm--rna-gnl|doejgi|Glyma.17G227700.1

## Sheet: monocots
Orthologous relationships Venn diagram analysis of GRX genes between Camellia sinensis and two monocots(Oryza sativa, and Sorghum bicolor)
Species	Gene ID
Cs vs Os	Cs--CSS0023854.1，Cs--CSS0041487.1
Cs vs Sb	Cs--CSS0009561.1，Cs--CSS0036569.1，Cs--CSS0046074.1
Cs vs Sb.and.Cs vs Os.	Cs--CSS0026741.1，Cs--CSS0049641.1，Cs--CSS0026515.1，Cs--CSS0026367.1，Cs--CSS0038944.1，Cs--CSS0025130.1，Cs--CSS0045505.1，Cs--CSS0047198.1，Cs--CSS0032078.1，Cs--CSS0022827.1，Cs--CSS0019712.1，Cs--CSS0013953.1

## Sheet: eudicots
Orthologous relationships Venn diagram analysis of GRX genes between Camellia sinensis and five eudicots(Glycine max, Populus trichocarpa, Vitis vinifera, Arabidopsis thaliana, Solanum tuberosum)
Species	Gene ID
Cs vs At.and.Cs vs Pt	-
Cs vs At.and.Cs vs Vv.and.Cs vs Pt.	-
Cs vs At.and.Cs vs Vv.	-
Cs vs At	-
Cs vs Gm.and.Cs vs At.and.Cs vs Pt.	Cs--CSS0026741.1，Cs--CSS0043242.1
Cs vs Gm.and.Cs vs At.and.Cs vs Vv.and.Cs vs Pt.	Cs--CSS0025130.1，Cs--CSS0041487.1
Cs vs Gm.and.Cs vs At.and.Cs vs Vv.	-
Cs vs Gm.and.Cs vs At.	Cs--CSS0005766.1
Cs vs Gm.and.Cs vs Pt.	-
Cs vs Gm.and.Cs vs St.and.Cs vs At.and.Cs vs Pt.	-
Cs vs Gm.and.Cs vs St.and.Cs vs At.and.Cs vs Vv.and.Cs vs Pt.	Cs--CSS0027361.1，Cs--CSS0012730.1，Cs--CSS0026288.1，Cs--CSS0002577.1，Cs--CSS0026515.1，Cs--CSS0038944.1，Cs--CSS0026367.1，Cs--CSS0014972.1，Cs--CSS0016648.1，Cs--CSS0036569.1，Cs--CSS0024807.1，Cs--CSS0047198.1，Cs--CSS0002931.1，Cs--CSS0018532.1，Cs--CSS0040554.1，Cs--CSS0048516.1
Cs vs Gm.and.Cs vs St.and.Cs vs At.and.Cs vs Vv.	Cs--CSS0009561.1
Cs vs Gm.and.Cs vs St.and.Cs vs At.	-
Cs vs Gm.and.Cs vs St.and.Cs vs Pt.	Cs--CSS0038141.1，Cs--CSS0008671.1，Cs--CSS0017711.1，Cs--CSS0013953.1
Cs vs Gm.and.Cs vs St.and.Cs vs Vv.and.Cs vs Pt.	Cs--CSS0045505.1，Cs--CSS0023185.1，Cs--CSS0049641.1，Cs--CSS0023854.1，Cs--CSS0027383.1，Cs--CSS0022827.1，Cs--CSS0021697.1，Cs--CSS0015651.1，Cs--CSS0014227.1
Cs vs Gm.and.Cs vs St.and.Cs vs Vv.	Cs--CSS0049990.1
Cs vs Gm.and.Cs vs St.	-
Cs vs Gm.and.Cs vs Vv.and.Cs vs Pt.	Cs--CSS0046074.1
Cs vs Gm.and.Cs vs Vv.	-
Cs vs Gm.	Cs--CSS0017181.1，Cs--CSS0043621.1，Cs--CSS0048300.1
Cs vs Pt.	Cs--CSS0000241.1
Cs vs St.and.Cs vs At.and.Cs vs Pt.	-
Cs vs St.and.Cs vs At.and.Cs vs Vv.and.Cs vs Pt.	Cs--CSS0047807.1
Cs vs St.and.Cs vs At.and.Cs vs Vv.	Cs--CSS0047503.1
Cs vs St.and.Cs vs At.	-
Cs vs St.and.Cs vs Pt.	Cs--CSS0048558.1
Cs vs St.and.Cs vs Vv.and.Cs vs Pt.	Cs--CSS0032078.1
Cs vs St.and.Cs vs Vv.	Cs--CSS0041979.1
Cs vs St.	-
Cs vs Vv.and.Cs vs Pt.	Cs--CSS0012888.1，Cs--CSS0013276.1，Cs--CSS0009163.1，Cs--CSS0032266.1
Cs vs Vv.	-

## Sheet: Shared
Orthologous relationships Venn diagram analysis of CsGRX genes between and monocots and eudicots
Species	Gene ID
Common CsGRXs from Eudicots.	Cs--CSS0027361.1，Cs--CSS0012730.1，Cs--CSS0026288.1，Cs--CSS0002577.1，Cs--CSS0014972.1，Cs--CSS0016648.1，Cs--CSS0036569.1，Cs--CSS0024807.1，Cs--CSS0002931.1，Cs--CSS0018532.1，Cs--CSS0040554.1，Cs--CSS0048516.1
Common CsGRXs from monocots.	Cs--CSS0026741.1，Cs--CSS0045505.1，Cs--CSS0049641.1，Cs--CSS0032078.1，Cs--CSS0022827.1，Cs--CSS0025130.1，Cs--CSS0013953.1
Common CsGRXs from Eudicots.and Common CsGRXs from monocots.	Cs--CSS0047198.1，Cs--CSS0026515.1，Cs--CSS0019712.1，Cs--CSS0026367.1，Cs--CSS0038944.1
