# Supplementary material
Source: MDPI journal article supplement (https://www.mdpi.com/1999-4907/14/8/1647)
Supplement: s1 [file s1 › Table S2.xlsx]

## Sheet: Sheet1
Table S2: The location information of cis-regulatory elements in the CsGRXs promoter region
Gene name	Element	Etart plot	End plot	Function annotation
CsGRL1	G-box	457	477	cis-acting regulatory element involved in light responsiveness
CsGRL1	G-box	458	478	cis-acting regulatory element involved in light responsiveness
CsGRL1	Box 4	1262	1282	part of a conserved DNA module involved in light responsiveness
CsGRL1	G-Box	237	257	cis-acting regulatory element involved in light responsiveness
CsGRL1	G-Box	458	478	cis-acting regulatory element involved in light responsiveness
CsGRL1	LAMP-element	1241	1261	part of a light responsive element
CsGRL1	ATCT-motif	478	498	part of a conserved DNA module involved in light responsiveness
CsGRL1	ATCT-motif	1878	1898	part of a conserved DNA module involved in light responsiveness
CsGRL1	TCT-motif	1139	1159	part of a light responsive element
CsGRL10	TCT-motif	1087	1107	part of a light responsive element
CsGRL10	GT1-motif	1896	1916	light responsive element
CsGRL10	GA-motif	505	525	part of a light responsive element
CsGRL10	Box 4	1691	1711	part of a conserved DNA module involved in light responsiveness
CsGRL10	Box 4	1713	1733	part of a conserved DNA module involved in light responsiveness
CsGRL11	Box 4	461	481	part of a conserved DNA module involved in light responsiveness
CsGRL11	Box 4	550	570	part of a conserved DNA module involved in light responsiveness
CsGRL11	Box 4	670	690	part of a conserved DNA module involved in light responsiveness
CsGRL11	Box 4	850	870	part of a conserved DNA module involved in light responsiveness
CsGRL11	Box 4	1467	1487	part of a conserved DNA module involved in light responsiveness
CsGRL11	Box 4	1572	1592	part of a conserved DNA module involved in light responsiveness
CsGRL11	Box 4	1629	1649	part of a conserved DNA module involved in light responsiveness
CsGRL11	Box 4	1633	1653	part of a conserved DNA module involved in light responsiveness
CsGRL11	Sp1	469	489	light responsive element
CsGRL11	AE-box	1920	1940	part of a module for light response
CsGRL11	GTGGC-motif	139	159	part of a light responsive element
CsGRL11	Gap-box	650	670	part of a light responsive element
CsGRL11	GT1-motif	82	102	light responsive element
CsGRL11	GT1-motif	728	748	light responsive element
CsGRL12	GT1-motif	275	295	light responsive element
CsGRL12	GT1-motif	910	930	light responsive element
CsGRL12	GT1-motif	1393	1413	light responsive element
CsGRL12	GT1-motif	1394	1414	light responsive element
CsGRL12	chs-CMA2a	831	851	part of a light responsive element
CsGRL12	Box 4	655	675	part of a conserved DNA module involved in light responsiveness
CsGRL12	Box 4	732	752	part of a conserved DNA module involved in light responsiveness
CsGRL12	Box 4	852	872	part of a conserved DNA module involved in light responsiveness
CsGRL12	Box 4	1032	1052	part of a conserved DNA module involved in light responsiveness
CsGRL12	Box 4	1651	1671	part of a conserved DNA module involved in light responsiveness
CsGRL12	Box 4	1655	1675	part of a conserved DNA module involved in light responsiveness
CsGRL12	Box 4	1663	1683	part of a conserved DNA module involved in light responsiveness
CsGRL12	Box 4	1756	1776	part of a conserved DNA module involved in light responsiveness
CsGRL12	Box 4	1818	1838	part of a conserved DNA module involved in light responsiveness
CsGRL12	Sp1	663	683	light responsive element
CsGRL12	GTGGC-motif	332	352	part of a light responsive element
CsGRL13	Box 4	1172	1192	part of a conserved DNA module involved in light responsiveness
CsGRL13	Box 4	1285	1305	part of a conserved DNA module involved in light responsiveness
CsGRL13	G-box	517	537	cis-acting regulatory element involved in light responsiveness
CsGRL13	G-box	1834	1854	cis-acting regulatory element involved in light responsiveness
CsGRL13	MRE	257	277	MYB binding site involved in light responsiveness
CsGRL13	MRE	655	675	MYB binding site involved in light responsiveness
CsGRL13	AT1-motif	1768	1788	part of a light responsive module
CsGRL13	GT1-motif	267	287	light responsive element
CsGRL13	ATCT-motif	1032	1052	part of a conserved DNA module involved in light responsiveness
CsGRL13	TCT-motif	513	533	part of a light responsive element
CsGRL13	TCT-motif	1008	1028	part of a light responsive element
CsGRL14	I-box	1736	1756	part of a light responsive element
CsGRL14	Box 4	661	681	part of a conserved DNA module involved in light responsiveness
CsGRL14	Box 4	901	921	part of a conserved DNA module involved in light responsiveness
CsGRL14	Box 4	959	979	part of a conserved DNA module involved in light responsiveness
CsGRL14	TCCC-motif	1857	1877	part of a light responsive element
CsGRL14	G-box	233	253	cis-acting regulatory element involved in light responsiveness
CsGRL14	Sp1	1848	1868	light responsive element
CsGRL14	AE-box	1015	1035	part of a module for light response
CsGRL14	G-Box	233	253	cis-acting regulatory element involved in light responsiveness
CsGRL14	G-Box	523	543	cis-acting regulatory element involved in light responsiveness
CsGRL15	I-box	1734	1754	part of a light responsive element
CsGRL15	TCCC-motif	1855	1875	part of a light responsive element
CsGRL15	Box 4	659	679	part of a conserved DNA module involved in light responsiveness
CsGRL15	Box 4	899	919	part of a conserved DNA module involved in light responsiveness
CsGRL15	Box 4	957	977	part of a conserved DNA module involved in light responsiveness
CsGRL15	G-box	175	195	cis-acting regulatory element involved in light responsiveness
CsGRL15	G-box	176	196	cis-acting regulatory element involved in light responsiveness
CsGRL15	G-box	232	252	cis-acting regulatory element involved in light responsiveness
CsGRL15	Sp1	1846	1866	light responsive element
CsGRL15	AE-box	1013	1033	part of a module for light response
CsGRL15	G-Box	176	196	cis-acting regulatory element involved in light responsiveness
CsGRL15	G-Box	232	252	cis-acting regulatory element involved in light responsiveness
CsGRL15	G-Box	521	541	cis-acting regulatory element involved in light responsiveness
CsGRL16	Box 4	441	461	part of a conserved DNA module involved in light responsiveness
CsGRL16	Box 4	652	672	part of a conserved DNA module involved in light responsiveness
CsGRL16	G-box	1468	1488	cis-acting regulatory element involved in light responsiveness
CsGRL16	G-box	1722	1742	cis-acting regulatory element involved in light responsiveness
CsGRL16	G-box	1724	1744	cis-acting regulatory element involved in light responsiveness
CsGRL16	G-box	1779	1799	cis-acting regulatory element involved in light responsiveness
CsGRL16	Box II	1723	1743	part of a light responsive element
CsGRL16	G-Box	1724	1744	cis-acting regulatory element involved in light responsiveness
CsGRL16	LAMP-element	1096	1116	part of a light responsive element
CsGRL16	GATA-motif	1398	1418	part of a light responsive element
CsGRL16	ATC-motif	1254	1274	part of a conserved DNA module involved in light responsiveness
CsGRL16	TCT-motif	1246	1266	part of a light responsive element
CsGRL16	ATCT-motif	259	279	part of a conserved DNA module involved in light responsiveness
CsGRL17	ATCT-motif	273	293	part of a conserved DNA module involved in light responsiveness
CsGRL17	TCT-motif	1251	1271	part of a light responsive element
CsGRL17	ATC-motif	1259	1279	part of a conserved DNA module involved in light responsiveness
CsGRL17	GATA-motif	489	509	part of a light responsive element
CsGRL17	GATA-motif	1402	1422	part of a light responsive element
CsGRL17	LAMP-element	1101	1121	part of a light responsive element
CsGRL17	G-Box	1724	1744	cis-acting regulatory element involved in light responsiveness
CsGRL17	Box II	1723	1743	part of a light responsive element
CsGRL17	AE-box	1615	1635	part of a module for light response
CsGRL17	G-box	1472	1492	cis-acting regulatory element involved in light responsiveness
CsGRL17	G-box	1722	1742	cis-acting regulatory element involved in light responsiveness
CsGRL17	G-box	1724	1744	cis-acting regulatory element involved in light responsiveness
CsGRL17	G-box	1779	1799	cis-acting regulatory element involved in light responsiveness
CsGRL17	Box 4	666	686	part of a conserved DNA module involved in light responsiveness
CsGRL18	G-box	47	67	cis-acting regulatory element involved in light responsiveness
CsGRL18	Box 4	170	190	part of a conserved DNA module involved in light responsiveness
CsGRL18	Box 4	665	685	part of a conserved DNA module involved in light responsiveness
CsGRL18	Box 4	1337	1357	part of a conserved DNA module involved in light responsiveness
CsGRL18	Box 4	1491	1511	part of a conserved DNA module involved in light responsiveness
CsGRL18	Box 4	1504	1524	part of a conserved DNA module involved in light responsiveness
CsGRL18	ACE	1610	1630	cis-acting element involved in light responsiveness
CsGRL18	MRE	187	207	MYB binding site involved in light responsiveness
CsGRL18	G-Box	47	67	cis-acting regulatory element involved in light responsiveness
CsGRL18	Gap-box	1849	1869	part of a light responsive element
CsGRL18	chs-CMA1a	714	734	part of a light responsive element
CsGRL18	TCT-motif	193	213	part of a light responsive element
CsGRL18	TCT-motif	1559	1579	part of a light responsive element
CsGRL18	ATCT-motif	1571	1591	part of a conserved DNA module involved in light responsiveness
CsGRL18	I-box	1443	1463	part of a light responsive element
CsGRL19	ATC-motif	35	55	part of a conserved DNA module involved in light responsiveness
CsGRL19	GT1-motif	1	14	light responsive element
CsGRL19	GT1-motif	1	15	light responsive element
CsGRL19	ATCT-motif	1558	1578	part of a conserved DNA module involved in light responsiveness
CsGRL19	TCT-motif	1546	1566	part of a light responsive element
CsGRL19	Box 4	1328	1348	part of a conserved DNA module involved in light responsiveness
CsGRL19	Box 4	1478	1498	part of a conserved DNA module involved in light responsiveness
CsGRL19	Box 4	1491	1511	part of a conserved DNA module involved in light responsiveness
CsGRL19	Gap-box	1847	1867	part of a light responsive element
CsGRL19	G-Box	897	917	cis-acting regulatory element involved in light responsiveness
CsGRL19	ACE	1597	1617	cis-acting element involved in light responsiveness
CsGRL19	MRE	1	17	MYB binding site involved in light responsiveness
CsGRL19	Box II	175	195	part of a light responsive element
CsGRL2	GT1-motif	1007	1027	light responsive element
CsGRL2	GT1-motif	1963	1983	light responsive element
CsGRL2	Box 4	928	948	part of a conserved DNA module involved in light responsiveness
CsGRL2	Box 4	1039	1059	part of a conserved DNA module involved in light responsiveness
CsGRL2	Box 4	1103	1123	part of a conserved DNA module involved in light responsiveness
CsGRL2	Box 4	1639	1659	part of a conserved DNA module involved in light responsiveness
CsGRL2	AE-box	1133	1153	part of a module for light response
CsGRL20	Box 4	883	903	part of a conserved DNA module involved in light responsiveness
CsGRL20	TCCC-motif	654	674	part of a light responsive element
CsGRL20	G-box	1038	1058	cis-acting regulatory element involved in light responsiveness
CsGRL20	TCT-motif	1004	1024	part of a light responsive element
CsGRL21	TCCC-motif	1732	1752	part of a light responsive element
CsGRL21	Box 4	123	143	part of a conserved DNA module involved in light responsiveness
CsGRL21	Box 4	407	427	part of a conserved DNA module involved in light responsiveness
CsGRL21	Box 4	837	857	part of a conserved DNA module involved in light responsiveness
CsGRL21	Box 4	1184	1204	part of a conserved DNA module involved in light responsiveness
CsGRL21	MRE	395	415	MYB binding site involved in light responsiveness
CsGRL21	MRE	1105	1125	MYB binding site involved in light responsiveness
CsGRL21	MRE	1590	1610	MYB binding site involved in light responsiveness
CsGRL21	GATA-motif	700	720	part of a light responsive element
CsGRL21	GATA-motif	1975	1995	part of a light responsive element
CsGRL21	LAMP-element	991	1011	part of a light responsive element
CsGRL21	LAMP-element	1975	1995	part of a light responsive element
CsGRL21	TCT-motif	1450	1470	part of a light responsive element
CsGRL21	TCT-motif	1661	1681	part of a light responsive element
CsGRL22	TCCC-motif	19	39	part of a light responsive element
CsGRL22	TCCC-motif	703	723	part of a light responsive element
CsGRL22	TCCC-motif	950	970	part of a light responsive element
CsGRL22	TCCC-motif	989	1009	part of a light responsive element
CsGRL22	Box 4	560	580	part of a conserved DNA module involved in light responsiveness
CsGRL22	TCT-motif	1235	1255	part of a light responsive element
CsGRL22	TCT-motif	1426	1446	part of a light responsive element
CsGRL22	GT1-motif	577	597	light responsive element
CsGRL22	GT1-motif	1354	1374	light responsive element
CsGRL22	GT1-motif	1355	1375	light responsive element
CsGRL23	AE-box	32	52	part of a module for light response
CsGRL23	G-box	533	553	cis-acting regulatory element involved in light responsiveness
CsGRL23	Box 4	609	629	part of a conserved DNA module involved in light responsiveness
CsGRL23	Box 4	1349	1369	part of a conserved DNA module involved in light responsiveness
CsGRL23	TCT-motif	1294	1314	part of a light responsive element
CsGRL23	I-box	673	693	part of a light responsive element
CsGRL23	I-box	674	694	part of a light responsive element
CsGRL23	AT1-motif	1002	1022	part of a light responsive module
CsGRL23	GATA-motif	673	693	part of a light responsive element
CsGRL23	GT1-motif	683	703	light responsive element
CsGRL24	Box 4	554	574	part of a conserved DNA module involved in light responsiveness
CsGRL24	TCCC-motif	13	33	part of a light responsive element
CsGRL24	TCCC-motif	697	717	part of a light responsive element
CsGRL24	TCCC-motif	950	970	part of a light responsive element
CsGRL24	TCCC-motif	989	1009	part of a light responsive element
CsGRL24	GT1-motif	571	591	light responsive element
CsGRL24	GT1-motif	1354	1374	light responsive element
CsGRL24	GT1-motif	1355	1375	light responsive element
CsGRL24	I-box	1083	1103	part of a light responsive element
CsGRL24	TCT-motif	1235	1255	part of a light responsive element
CsGRL24	TCT-motif	1426	1446	part of a light responsive element
CsGRL25	GT1-motif	1013	1033	light responsive element
CsGRL25	GT1-motif	1963	1983	light responsive element
CsGRL25	AT1-motif	1102	1122	part of a light responsive module
CsGRL25	Box 4	935	955	part of a conserved DNA module involved in light responsiveness
CsGRL25	Box 4	1045	1065	part of a conserved DNA module involved in light responsiveness
CsGRL25	Box 4	1639	1659	part of a conserved DNA module involved in light responsiveness
CsGRL26	Box 4	32	52	part of a conserved DNA module involved in light responsiveness
CsGRL26	Box 4	355	375	part of a conserved DNA module involved in light responsiveness
CsGRL26	Box 4	1404	1424	part of a conserved DNA module involved in light responsiveness
CsGRL26	Box 4	1705	1725	part of a conserved DNA module involved in light responsiveness
CsGRL26	TCCC-motif	745	765	part of a light responsive element
CsGRL26	G-box	1	21	cis-acting regulatory element involved in light responsiveness
CsGRL26	G-box	1007	1027	cis-acting regulatory element involved in light responsiveness
CsGRL26	G-Box	633	653	cis-acting regulatory element involved in light responsiveness
CsGRL26	LAMP-element	995	1015	part of a light responsive element
CsGRL26	GATA-motif	1083	1103	part of a light responsive element
CsGRL26	GT1-motif	500	520	light responsive element
CsGRL26	GT1-motif	953	973	light responsive element
CsGRL26	GT1-motif	1136	1156	light responsive element
CsGRL26	GT1-motif	1744	1764	light responsive element
CsGRL26	GT1-motif	1745	1765	light responsive element
CsGRL26	GT1-motif	1895	1915	light responsive element
CsGRL26	I-box	996	1016	part of a light responsive element
CsGRL27	MRE	266	286	MYB binding site involved in light responsiveness
CsGRL27	MRE	664	684	MYB binding site involved in light responsiveness
CsGRL27	G-box	526	546	cis-acting regulatory element involved in light responsiveness
CsGRL27	G-box	1835	1855	cis-acting regulatory element involved in light responsiveness
CsGRL27	Box 4	1180	1200	part of a conserved DNA module involved in light responsiveness
CsGRL27	Box 4	1293	1313	part of a conserved DNA module involved in light responsiveness
CsGRL27	TCT-motif	522	542	part of a light responsive element
CsGRL27	TCT-motif	1017	1037	part of a light responsive element
CsGRL27	ATCT-motif	1041	1061	part of a conserved DNA module involved in light responsiveness
CsGRL27	GT1-motif	276	296	light responsive element
CsGRL27	AT1-motif	1769	1789	part of a light responsive module
CsGRL3	G-box	371	391	cis-acting regulatory element involved in light responsiveness
CsGRL3	Box 4	12	32	part of a conserved DNA module involved in light responsiveness
CsGRL3	Box 4	44	64	part of a conserved DNA module involved in light responsiveness
CsGRL3	Box 4	339	359	part of a conserved DNA module involved in light responsiveness
CsGRL3	Box 4	343	363	part of a conserved DNA module involved in light responsiveness
CsGRL3	Box 4	359	379	part of a conserved DNA module involved in light responsiveness
CsGRL3	Box 4	577	597	part of a conserved DNA module involved in light responsiveness
CsGRL3	Box 4	750	770	part of a conserved DNA module involved in light responsiveness
CsGRL3	Box 4	830	850	part of a conserved DNA module involved in light responsiveness
CsGRL3	Box 4	864	884	part of a conserved DNA module involved in light responsiveness
CsGRL3	AE-box	1981	2001	part of a module for light response
CsGRL3	TCT-motif	98	118	part of a light responsive element
CsGRL4	ATCT-motif	278	298	part of a conserved DNA module involved in light responsiveness
CsGRL4	TCT-motif	931	951	part of a light responsive element
CsGRL4	I-box	959	979	part of a light responsive element
CsGRL4	I-box	1010	1030	part of a light responsive element
CsGRL4	I-box	1284	1304	part of a light responsive element
CsGRL4	GATA-motif	1692	1712	part of a light responsive element
CsGRL4	G-Box	455	475	cis-acting regulatory element involved in light responsiveness
CsGRL4	G-box	540	560	cis-acting regulatory element involved in light responsiveness
CsGRL4	G-box	1299	1319	cis-acting regulatory element involved in light responsiveness
CsGRL4	Box 4	825	845	part of a conserved DNA module involved in light responsiveness
CsGRL4	Box 4	1836	1856	part of a conserved DNA module involved in light responsiveness
CsGRL5	GT1-motif	305	325	light responsive element
CsGRL5	GT1-motif	306	326	light responsive element
CsGRL5	GT1-motif	1799	1819	light responsive element
CsGRL5	GT1-motif	1800	1820	light responsive element
CsGRL5	chs-CMA2a	670	690	part of a light responsive element
CsGRL5	chs-CMA1a	323	343	part of a light responsive element
CsGRL5	chs-Unit 1 m1	1826	1846	part of a light responsive element
CsGRL5	ATCT-motif	821	841	part of a conserved DNA module involved in light responsiveness
CsGRL5	TCT-motif	357	377	part of a light responsive element
CsGRL5	TCT-motif	561	581	part of a light responsive element
CsGRL5	TCCC-motif	1760	1780	part of a light responsive element
CsGRL5	G-Box	1152	1172	cis-acting regulatory element involved in light responsiveness
CsGRL5	MRE	658	678	MYB binding site involved in light responsiveness
CsGRL5	AE-box	509	529	part of a module for light response
CsGRL5	AE-box	1436	1456	part of a module for light response
CsGRL6	GATA-motif	1573	1593	part of a light responsive element
CsGRL6	GT1-motif	106	126	light responsive element
CsGRL6	GT1-motif	282	302	light responsive element
CsGRL6	3-AF1 binding site	139	159	light responsive element
CsGRL6	ATCT-motif	716	736	part of a conserved DNA module involved in light responsiveness
CsGRL6	Box 4	328	348	part of a conserved DNA module involved in light responsiveness
CsGRL6	Box 4	401	421	part of a conserved DNA module involved in light responsiveness
CsGRL6	G-Box	1199	1219	cis-acting regulatory element involved in light responsiveness
CsGRL6	G-Box	1372	1392	cis-acting regulatory element involved in light responsiveness
CsGRL6	GA-motif	71	91	part of a light responsive element
CsGRL7	G-Box	1847	1867	cis-acting regulatory element involved in light responsiveness
CsGRL7	Box 4	26	46	part of a conserved DNA module involved in light responsiveness
CsGRL7	Box 4	58	78	part of a conserved DNA module involved in light responsiveness
CsGRL7	Box 4	144	164	part of a conserved DNA module involved in light responsiveness
CsGRL7	Box 4	974	994	part of a conserved DNA module involved in light responsiveness
CsGRL7	Box 4	1102	1122	part of a conserved DNA module involved in light responsiveness
CsGRL7	TCT-motif	515	535	part of a light responsive element
CsGRL7	GT1-motif	392	412	light responsive element
CsGRL7	GT1-motif	878	898	light responsive element
CsGRL7	GT1-motif	1086	1106	light responsive element
CsGRL7	chs-CMA2a	1948	1968	part of a light responsive element
CsGRL7	AT1-motif	1750	1770	part of a light responsive module
CsGRL8	ACE	521	541	cis-acting element involved in light responsiveness
CsGRL8	Sp1	1831	1851	light responsive element
CsGRL8	TCT-motif	1625	1645	part of a light responsive element
CsGRL8	ATCT-motif	1516	1536	part of a conserved DNA module involved in light responsiveness
CsGRL8	GATA-motif	416	436	part of a light responsive element
CsGRL8	chs-CMA2a	1394	1414	part of a light responsive element
CsGRL8	GT1-motif	23	43	light responsive element
CsGRL8	GT1-motif	734	754	light responsive element
CsGRL8	GT1-motif	767	787	light responsive element
CsGRL9	chs-CMA2a	731	751	part of a light responsive element
CsGRL9	GT1-motif	79	99	light responsive element
CsGRL9	GT1-motif	112	132	light responsive element
CsGRL9	TCT-motif	1630	1650	part of a light responsive element
CsGRL9	ATCT-motif	1372	1392	part of a conserved DNA module involved in light responsiveness
CsGRL9	ATCT-motif	1521	1541	part of a conserved DNA module involved in light responsiveness
CsGRL9	AAAC-motif	866	886	light responsive element
CsGRL9	Sp1	1832	1852	light responsive element
CsGRL9	MRE	1064	1084	MYB binding site involved in light responsiveness
CsGRX12	I-box	1836	1856	part of a light responsive element
CsGRX12	GT1-motif	9	29	light responsive element
CsGRX12	GT1-motif	552	572	light responsive element
CsGRX12	GT1-motif	553	573	light responsive element
CsGRX12	MRE	1032	1052	MYB binding site involved in light responsiveness
CsGRX12	MRE	1859	1879	MYB binding site involved in light responsiveness
CsGRX12	GATA-motif	521	541	part of a light responsive element
CsGRX12	Box 4	543	563	part of a conserved DNA module involved in light responsiveness
CsGRX12	Gap-box	942	962	part of a light responsive element
CsGRX13	GATA-motif	651	671	part of a light responsive element
CsGRX13	Box 4	69	89	part of a conserved DNA module involved in light responsiveness
CsGRX13	Box 4	489	509	part of a conserved DNA module involved in light responsiveness
CsGRX13	G-box	764	784	cis-acting regulatory element involved in light responsiveness
CsGRX13	G-box	843	863	cis-acting regulatory element involved in light responsiveness
CsGRX13	G-box	1247	1267	cis-acting regulatory element involved in light responsiveness
CsGRX13	G-box	1661	1681	cis-acting regulatory element involved in light responsiveness
CsGRX13	TCT-motif	392	412	part of a light responsive element
CsGRX14	Gap-box	891	911	part of a light responsive element
CsGRX14	GATA-motif	472	492	part of a light responsive element
CsGRX14	Box 4	88	108	part of a conserved DNA module involved in light responsiveness
CsGRX14	Box 4	494	514	part of a conserved DNA module involved in light responsiveness
CsGRX14	chs-CMA1a	73	93	part of a light responsive element
CsGRX14	ATCT-motif	1329	1349	part of a conserved DNA module involved in light responsiveness
CsGRX14	MRE	663	683	MYB binding site involved in light responsiveness
CsGRX14	MRE	1032	1052	MYB binding site involved in light responsiveness
CsGRX14	MRE	1859	1879	MYB binding site involved in light responsiveness
CsGRX14	GT1-motif	503	523	light responsive element
CsGRX14	GT1-motif	504	524	light responsive element
CsGRX14	I-box	1836	1856	part of a light responsive element
CsGRX15	G-box	764	784	cis-acting regulatory element involved in light responsiveness
CsGRX15	G-box	843	863	cis-acting regulatory element involved in light responsiveness
CsGRX15	G-box	1248	1268	cis-acting regulatory element involved in light responsiveness
CsGRX15	G-box	1662	1682	cis-acting regulatory element involved in light responsiveness
CsGRX15	TCT-motif	388	408	part of a light responsive element
CsGRX15	GATA-motif	651	671	part of a light responsive element
CsGRX15	Box 4	63	83	part of a conserved DNA module involved in light responsiveness
CsGRX15	Box 4	485	505	part of a conserved DNA module involved in light responsiveness
CsGRX15	chs-CMA1a	1198	1218	part of a light responsive element
CsGRX16	G-box	1526	1546	cis-acting regulatory element involved in light responsiveness
CsGRX16	TCT-motif	755	775	part of a light responsive element
CsGRX16	Box 4	244	264	part of a conserved DNA module involved in light responsiveness
CsGRX16	Box 4	810	830	part of a conserved DNA module involved in light responsiveness
CsGRX16	Box 4	846	866	part of a conserved DNA module involved in light responsiveness
CsGRX16	Box 4	925	945	part of a conserved DNA module involved in light responsiveness
CsGRX16	Box 4	959	979	part of a conserved DNA module involved in light responsiveness
CsGRX16	Box 4	993	1013	part of a conserved DNA module involved in light responsiveness
CsGRX16	GT1-motif	1283	1303	light responsive element
CsGRX16	G-Box	266	286	cis-acting regulatory element involved in light responsiveness
CsGRX16	chs-CMA1a	1220	1240	part of a light responsive element
CsGRX17	Sp1	473	493	light responsive element
CsGRX17	G-Box	1647	1667	cis-acting regulatory element involved in light responsiveness
CsGRX17	ATCT-motif	258	278	part of a conserved DNA module involved in light responsiveness
CsGRX17	GT1-motif	516	536	light responsive element
CsGRX17	AT1-motif	105	125	part of a light responsive module
CsGRX17	Box 4	731	751	part of a conserved DNA module involved in light responsiveness
CsGRX17	Box 4	767	787	part of a conserved DNA module involved in light responsiveness
CsGRX17	Box 4	1162	1182	part of a conserved DNA module involved in light responsiveness
CsGRX17	GA-motif	1315	1335	part of a light responsive element
CsGRX18	AT1-motif	208	228	part of a light responsive module
CsGRX18	G-box	843	863	cis-acting regulatory element involved in light responsiveness
CsGRX18	Box 4	623	643	part of a conserved DNA module involved in light responsiveness
CsGRX18	Box 4	1015	1035	part of a conserved DNA module involved in light responsiveness
CsGRX18	Box 4	1051	1071	part of a conserved DNA module involved in light responsiveness
CsGRX18	Box 4	1221	1241	part of a conserved DNA module involved in light responsiveness
CsGRX18	G-Box	845	865	cis-acting regulatory element involved in light responsiveness
CsGRX18	G-Box	1711	1731	cis-acting regulatory element involved in light responsiveness
CsGRX18	I-box	1059	1079	part of a light responsive element
CsGRX18	chs-CMA1a	466	486	part of a light responsive element
CsGRX20	GT1-motif	844	864	light responsive element
CsGRX20	GT1-motif	1102	1122	light responsive element
CsGRX20	GT1-motif	1103	1123	light responsive element
CsGRX20	AE-box	1284	1304	part of a module for light response
CsGRX20	Box 4	1309	1329	part of a conserved DNA module involved in light responsiveness
CsGRX20	Box 4	1336	1356	part of a conserved DNA module involved in light responsiveness
CsGRX20	Box 4	1433	1453	part of a conserved DNA module involved in light responsiveness
CsGRX20	Box 4	1437	1457	part of a conserved DNA module involved in light responsiveness
CsGRX20	Box 4	1683	1703	part of a conserved DNA module involved in light responsiveness
CsGRX20	G-box	456	476	cis-acting regulatory element involved in light responsiveness
CsGRX20	G-box	1800	1820	cis-acting regulatory element involved in light responsiveness
CsGRX21	AE-box	1259	1279	part of a module for light response
CsGRX21	GT1-motif	970	990	light responsive element
CsGRX21	GT1-motif	971	991	light responsive element
CsGRX21	GT1-motif	1077	1097	light responsive element
CsGRX21	GT1-motif	1078	1098	light responsive element
CsGRX21	G-Box	294	314	cis-acting regulatory element involved in light responsiveness
CsGRX21	TCCC-motif	1953	1973	part of a light responsive element
CsGRX21	G-box	1771	1791	cis-acting regulatory element involved in light responsiveness
CsGRX21	TCT-motif	1090	1110	part of a light responsive element
CsGRX21	Box 4	413	433	part of a conserved DNA module involved in light responsiveness
CsGRX21	Box 4	447	467	part of a conserved DNA module involved in light responsiveness
CsGRX21	Box 4	529	549	part of a conserved DNA module involved in light responsiveness
CsGRX21	Box 4	1284	1304	part of a conserved DNA module involved in light responsiveness
CsGRX21	Box 4	1408	1428	part of a conserved DNA module involved in light responsiveness
CsGRX21	Box 4	1412	1432	part of a conserved DNA module involved in light responsiveness
CsGRX23	MRE	1406	1426	MYB binding site involved in light responsiveness
CsGRX23	ATCT-motif	1615	1635	part of a conserved DNA module involved in light responsiveness
CsGRX23	GT1-motif	384	404	light responsive element
CsGRX23	GT1-motif	385	405	light responsive element
CsGRX23	GT1-motif	1505	1525	light responsive element
CsGRX23	GT1-motif	1559	1579	light responsive element
CsGRX23	GT1-motif	1582	1602	light responsive element
CsGRX23	I-box	574	594	part of a light responsive element
CsGRX23	GA-motif	1797	1817	part of a light responsive element
CsGRX23	Box 4	60	80	part of a conserved DNA module involved in light responsiveness
CsGRX23	Box 4	99	119	part of a conserved DNA module involved in light responsiveness
CsGRX23	Box 4	113	133	part of a conserved DNA module involved in light responsiveness
CsGRX23	Box 4	131	151	part of a conserved DNA module involved in light responsiveness
CsGRX23	Box 4	1227	1247	part of a conserved DNA module involved in light responsiveness
CsGRX23	AT1-motif	59	79	part of a light responsive module
CsGRX23	G-box	1816	1836	cis-acting regulatory element involved in light responsiveness
CsGRX23	G-box	1829	1849	cis-acting regulatory element involved in light responsiveness
CsGRX23	TCT-motif	1040	1060	part of a light responsive element
CsGRX24	AE-box	1068	1088	part of a module for light response
CsGRX24	I-box	1738	1758	part of a light responsive element
CsGRX24	TCCC-motif	1162	1182	part of a light responsive element
CsGRX24	GATA-motif	1738	1758	part of a light responsive element
CsGRX24	Box 4	741	761	part of a conserved DNA module involved in light responsiveness
CsGRX25	TCT-motif	946	966	part of a light responsive element
CsGRX25	GA-motif	1133	1153	part of a light responsive element
CsGRX25	GA-motif	1825	1845	part of a light responsive element
CsGRX25	Box 4	1221	1241	part of a conserved DNA module involved in light responsiveness
CsGRX25	Box 4	1622	1642	part of a conserved DNA module involved in light responsiveness
CsGRX25	GT1-motif	16	36	light responsive element
CsGRX25	GT1-motif	18	38	light responsive element
CsGRX25	TCCC-motif	1574	1594	part of a light responsive element
CsGRX25	TCCC-motif	1682	1702	part of a light responsive element
CsGRX31	Box 4	282	302	part of a conserved DNA module involved in light responsiveness
CsGRX31	Box 4	371	391	part of a conserved DNA module involved in light responsiveness
CsGRX31	Box 4	972	992	part of a conserved DNA module involved in light responsiveness
CsGRX31	GATA-motif	45	65	part of a light responsive element
CsGRX31	GATA-motif	404	424	part of a light responsive element
CsGRX31	TCT-motif	243	263	part of a light responsive element
CsGRX31	G-box	1702	1722	cis-acting regulatory element involved in light responsiveness
CsGRX31	G-Box	1702	1722	cis-acting regulatory element involved in light responsiveness
CsGRX31	GT1-motif	1959	1979	light responsive element
CsGRX32	GT1-motif	1007	1027	light responsive element
CsGRX32	I-box	541	561	part of a light responsive element
CsGRX32	I-box	1606	1626	part of a light responsive element
CsGRX33	GT1-motif	283	303	light responsive element
CsGRX33	GT1-motif	387	407	light responsive element
CsGRX33	GT1-motif	466	486	light responsive element
CsGRX33	G-Box	1700	1720	cis-acting regulatory element involved in light responsiveness
CsGRX33	TCCC-motif	1922	1942	part of a light responsive element
CsGRX33	G-box	1700	1720	cis-acting regulatory element involved in light responsiveness
CsGRX33	TCT-motif	1190	1210	part of a light responsive element
CsGRX33	GATA-motif	660	680	part of a light responsive element
CsGRX33	Box 4	26	46	part of a conserved DNA module involved in light responsiveness
CsGRX33	Box 4	30	50	part of a conserved DNA module involved in light responsiveness
CsGRX33	Box 4	566	586	part of a conserved DNA module involved in light responsiveness
CsGRX33	Box 4	1028	1048	part of a conserved DNA module involved in light responsiveness
CsGRX33	Box 4	1252	1272	part of a conserved DNA module involved in light responsiveness
CsGRX33	Box 4	1263	1283	part of a conserved DNA module involved in light responsiveness
CsGRX33	Box 4	1354	1374	part of a conserved DNA module involved in light responsiveness
CsGRX33	Box 4	1601	1621	part of a conserved DNA module involved in light responsiveness
CsGRX34	ATC-motif	1880	1900	part of a conserved DNA module involved in light responsiveness
CsGRX34	Gap-box	212	232	part of a light responsive element
CsGRX34	LAMP-element	1149	1169	part of a light responsive element
CsGRX34	Box 4	867	887	part of a conserved DNA module involved in light responsiveness
CsGRX34	GATA-motif	742	762	part of a light responsive element
CsGRX34	TCT-motif	641	661	part of a light responsive element
CsGRX34	G-box	1114	1134	cis-acting regulatory element involved in light responsiveness
CsGRX34	G-box	1115	1135	cis-acting regulatory element involved in light responsiveness
CsGRX34	G-box	1479	1499	cis-acting regulatory element involved in light responsiveness
CsGRX34	G-box	1481	1501	cis-acting regulatory element involved in light responsiveness
CsGRX34	chs-CMA2a	408	428	part of a light responsive element
CsGRX34	chs-CMA1a	1497	1517	part of a light responsive element
CsGRX34	I-box	740	760	part of a light responsive element
CsGRX34	I-box	742	762	part of a light responsive element
CsGRX34	G-Box	1115	1135	cis-acting regulatory element involved in light responsiveness
CsGRX34	G-Box	1481	1501	cis-acting regulatory element involved in light responsiveness
CsGRX34	MRE	1347	1367	MYB binding site involved in light responsiveness
CsGRX34	GT1-motif	1623	1643	light responsive element
CsGRX35	GT1-motif	1330	1350	light responsive element
CsGRX35	ATCT-motif	314	334	part of a conserved DNA module involved in light responsiveness
CsGRX35	GA-motif	1885	1905	part of a light responsive element
CsGRX35	Box 4	134	154	part of a conserved DNA module involved in light responsiveness
CsGRX35	Box 4	364	384	part of a conserved DNA module involved in light responsiveness
CsGRX35	Box 4	1039	1059	part of a conserved DNA module involved in light responsiveness
CsGRX35	Box 4	1470	1490	part of a conserved DNA module involved in light responsiveness
CsGRX35	TCT-motif	120	140	part of a light responsive element
CsGRX35	TCT-motif	880	900	part of a light responsive element
CsGRX35	G-box	947	967	cis-acting regulatory element involved in light responsiveness
CsGRX35	G-box	1579	1599	cis-acting regulatory element involved in light responsiveness
CsGRX36	G-Box	400	420	cis-acting regulatory element involved in light responsiveness
CsGRX36	G-Box	1701	1721	cis-acting regulatory element involved in light responsiveness
CsGRX36	AE-box	1653	1673	part of a module for light response
CsGRX36	G-box	400	420	cis-acting regulatory element involved in light responsiveness
CsGRX36	G-box	527	547	cis-acting regulatory element involved in light responsiveness
CsGRX36	G-box	1701	1721	cis-acting regulatory element involved in light responsiveness
CsGRX36	TCT-motif	979	999	part of a light responsive element
CsGRX36	TCT-motif	1373	1393	part of a light responsive element
CsGRX36	Box 4	98	118	part of a conserved DNA module involved in light responsiveness
CsGRX36	Box 4	183	203	part of a conserved DNA module involved in light responsiveness
CsGRX36	Box 4	1043	1063	part of a conserved DNA module involved in light responsiveness
CsGRX36	Box 4	1143	1163	part of a conserved DNA module involved in light responsiveness
CsGRX36	Box 4	1287	1307	part of a conserved DNA module involved in light responsiveness
CsGRX36	Box 4	1670	1690	part of a conserved DNA module involved in light responsiveness
CsGRX36	Box 4	1827	1847	part of a conserved DNA module involved in light responsiveness
CsGRX36	3-AF1 binding site	1458	1478	light responsive element
CsGRX37	chs-CMA2a	424	444	part of a light responsive element
CsGRX37	G-box	1128	1148	cis-acting regulatory element involved in light responsiveness
CsGRX37	G-box	1129	1149	cis-acting regulatory element involved in light responsiveness
CsGRX37	G-box	1479	1499	cis-acting regulatory element involved in light responsiveness
CsGRX37	G-box	1481	1501	cis-acting regulatory element involved in light responsiveness
CsGRX37	G-box	1618	1638	cis-acting regulatory element involved in light responsiveness
CsGRX37	TCT-motif	655	675	part of a light responsive element
CsGRX37	GATA-motif	756	776	part of a light responsive element
CsGRX37	Box 4	881	901	part of a conserved DNA module involved in light responsiveness
CsGRX37	LAMP-element	1163	1183	part of a light responsive element
CsGRX37	Gap-box	217	237	part of a light responsive element
CsGRX37	ATC-motif	1880	1900	part of a conserved DNA module involved in light responsiveness
CsGRX37	GT1-motif	1623	1643	light responsive element
CsGRX37	MRE	1347	1367	MYB binding site involved in light responsiveness
CsGRX37	MRE	1590	1610	MYB binding site involved in light responsiveness
CsGRX37	G-Box	1129	1149	cis-acting regulatory element involved in light responsiveness
CsGRX37	G-Box	1481	1501	cis-acting regulatory element involved in light responsiveness
CsGRX37	G-Box	1618	1638	cis-acting regulatory element involved in light responsiveness
CsGRX37	I-box	754	774	part of a light responsive element
CsGRX37	I-box	756	776	part of a light responsive element
CsGRX37	chs-CMA1a	1497	1517	part of a light responsive element
CsGRX38	ATCT-motif	319	339	part of a conserved DNA module involved in light responsiveness
CsGRX38	GT1-motif	1331	1351	light responsive element
CsGRX38	G-box	948	968	cis-acting regulatory element involved in light responsiveness
CsGRX38	G-box	1580	1600	cis-acting regulatory element involved in light responsiveness
CsGRX38	TCT-motif	125	145	part of a light responsive element
CsGRX38	TCT-motif	881	901	part of a light responsive element
CsGRX38	GA-motif	1886	1906	part of a light responsive element
CsGRX38	Box 4	139	159	part of a conserved DNA module involved in light responsiveness
CsGRX38	Box 4	369	389	part of a conserved DNA module involved in light responsiveness
CsGRX38	Box 4	1040	1060	part of a conserved DNA module involved in light responsiveness
CsGRX38	Box 4	1471	1491	part of a conserved DNA module involved in light responsiveness
CsGRX39	I-box	1875	1895	part of a light responsive element
CsGRX39	G-Box	1712	1732	cis-acting regulatory element involved in light responsiveness
CsGRX39	MRE	503	523	MYB binding site involved in light responsiveness
CsGRX39	AE-box	1562	1582	part of a module for light response
CsGRX39	G-box	1379	1399	cis-acting regulatory element involved in light responsiveness
CsGRX39	G-box	1712	1732	cis-acting regulatory element involved in light responsiveness
CsGRX39	TCT-motif	995	1015	part of a light responsive element
CsGRX39	LAMP-element	784	804	part of a light responsive element
CsGRX39	GATA-motif	667	687	part of a light responsive element
CsGRX39	Box 4	1222	1242	part of a conserved DNA module involved in light responsiveness
CsGRX39	Box 4	1409	1429	part of a conserved DNA module involved in light responsiveness
CsGRX39	Box 4	1795	1815	part of a conserved DNA module involved in light responsiveness
CsGRX39	Box 4	1828	1848	part of a conserved DNA module involved in light responsiveness
CsGRX39	Box 4	1835	1855	part of a conserved DNA module involved in light responsiveness
CsGRX4	chs-CMA1a	11	31	part of a light responsive element
CsGRX4	chs-CMA1a	380	400	part of a light responsive element
CsGRX4	chs-CMA1a	648	668	part of a light responsive element
CsGRX4	TCCC-motif	923	943	part of a light responsive element
CsGRX4	GT1-motif	199	219	light responsive element
CsGRX4	GT1-motif	200	220	light responsive element
CsGRX4	GT1-motif	446	466	light responsive element
CsGRX4	GT1-motif	933	953	light responsive element
CsGRX4	GT1-motif	1863	1883	light responsive element
CsGRX4	G-Box	376	396	cis-acting regulatory element involved in light responsiveness
CsGRX4	Box 4	145	165	part of a conserved DNA module involved in light responsiveness
CsGRX4	Box 4	961	981	part of a conserved DNA module involved in light responsiveness
CsGRX4	Box 4	1842	1862	part of a conserved DNA module involved in light responsiveness
CsGRX4	GATA-motif	1312	1332	part of a light responsive element
CsGRX4	TCT-motif	790	810	part of a light responsive element
CsGRX40	GT1-motif	49	69	light responsive element
CsGRX40	MRE	1524	1544	MYB binding site involved in light responsiveness
CsGRX40	G-Box	1704	1724	cis-acting regulatory element involved in light responsiveness
CsGRX40	G-box	1637	1657	cis-acting regulatory element involved in light responsiveness
CsGRX40	G-box	1704	1724	cis-acting regulatory element involved in light responsiveness
CsGRX40	Box 4	682	702	part of a conserved DNA module involved in light responsiveness
CsGRX40	Box 4	1087	1107	part of a conserved DNA module involved in light responsiveness
CsGRX40	Box 4	1829	1849	part of a conserved DNA module involved in light responsiveness
CsGRX40	GATA-motif	211	231	part of a light responsive element
CsGRX41	ATC-motif	1136	1156	part of a conserved DNA module involved in light responsiveness
CsGRX41	Box 4	1829	1849	part of a conserved DNA module involved in light responsiveness
CsGRX41	GATA-motif	604	624	part of a light responsive element
CsGRX41	chs-CMA2a	1727	1747	part of a light responsive element
CsGRX41	G-Box	1718	1738	cis-acting regulatory element involved in light responsiveness
CsGRX41	MRE	1292	1312	MYB binding site involved in light responsiveness
CsGRX42	Box 4	50	70	part of a conserved DNA module involved in light responsiveness
CsGRX42	Box 4	189	209	part of a conserved DNA module involved in light responsiveness
CsGRX42	Box 4	801	821	part of a conserved DNA module involved in light responsiveness
CsGRX42	Box 4	1296	1316	part of a conserved DNA module involved in light responsiveness
CsGRX42	Box 4	1325	1345	part of a conserved DNA module involved in light responsiveness
CsGRX42	Box 4	1505	1525	part of a conserved DNA module involved in light responsiveness
CsGRX42	LAMP-element	337	357	part of a light responsive element
CsGRX42	G-box	1635	1655	cis-acting regulatory element involved in light responsiveness
CsGRX42	AT1-motif	1813	1833	part of a light responsive module
CsGRX42	G-Box	1703	1723	cis-acting regulatory element involved in light responsiveness
CsGRX42	Sp1	1102	1122	light responsive element
CsGRX42	GT1-motif	1657	1677	light responsive element
CsGRX43	Box 4	103	123	part of a conserved DNA module involved in light responsiveness
CsGRX43	Box 4	349	369	part of a conserved DNA module involved in light responsiveness
CsGRX43	Box 4	518	538	part of a conserved DNA module involved in light responsiveness
CsGRX43	Box 4	1197	1217	part of a conserved DNA module involved in light responsiveness
CsGRX43	Box 4	1370	1390	part of a conserved DNA module involved in light responsiveness
CsGRX43	G-Box	69	89	cis-acting regulatory element involved in light responsiveness
CsGRX43	G-Box	189	209	cis-acting regulatory element involved in light responsiveness
CsGRX43	G-Box	1702	1722	cis-acting regulatory element involved in light responsiveness
CsGRX43	G-box	1702	1722	cis-acting regulatory element involved in light responsiveness
CsGRX43	GT1-motif	986	1006	light responsive element
CsGRX43	GT1-motif	987	1007	light responsive element
CsGRX44	Box 4	1480	1500	part of a conserved DNA module involved in light responsiveness
CsGRX44	Box 4	1583	1603	part of a conserved DNA module involved in light responsiveness
CsGRX44	G-box	1707	1727	cis-acting regulatory element involved in light responsiveness
CsGRX44	G-box	1708	1728	cis-acting regulatory element involved in light responsiveness
CsGRX44	AE-box	987	1007	part of a module for light response
CsGRX44	AE-box	1202	1222	part of a module for light response
CsGRX44	G-Box	1708	1728	cis-acting regulatory element involved in light responsiveness
CsGRX44	Sp1	606	626	light responsive element
CsGRX44	Sp1	613	633	light responsive element
CsGRX44	Sp1	711	731	light responsive element
CsGRX45	G-box	1079	1099	cis-acting regulatory element involved in light responsiveness
CsGRX45	G-box	1080	1100	cis-acting regulatory element involved in light responsiveness
CsGRX45	G-box	1695	1715	cis-acting regulatory element involved in light responsiveness
CsGRX45	Box 4	852	872	part of a conserved DNA module involved in light responsiveness
CsGRX45	Box 4	955	975	part of a conserved DNA module involved in light responsiveness
CsGRX45	Gap-box	1788	1808	part of a light responsive element
CsGRX45	AE-box	359	379	part of a module for light response
CsGRX45	AE-box	574	594	part of a module for light response
CsGRX45	G-Box	1080	1100	cis-acting regulatory element involved in light responsiveness
CsGRX45	G-Box	1695	1715	cis-acting regulatory element involved in light responsiveness
CsGRX45	Sp1	83	103	light responsive element
CsGRX45	chs-CMA1a	1809	1829	part of a light responsive element
CsGRX46	Gap-box	1211	1231	part of a light responsive element
CsGRX46	Gap-box	1517	1537	part of a light responsive element
CsGRX46	Gap-box	1831	1851	part of a light responsive element
CsGRX46	Box 4	275	295	part of a conserved DNA module involved in light responsiveness
CsGRX46	Box 4	378	398	part of a conserved DNA module involved in light responsiveness
CsGRX46	G-box	502	522	cis-acting regulatory element involved in light responsiveness
CsGRX46	G-box	503	523	cis-acting regulatory element involved in light responsiveness
CsGRX46	G-box	1118	1138	cis-acting regulatory element involved in light responsiveness
CsGRX46	chs-CMA1a	1232	1252	part of a light responsive element
CsGRX46	chs-CMA1a	1852	1872	part of a light responsive element
CsGRX46	AE-box	1	17	part of a module for light response
CsGRX46	G-Box	503	523	cis-acting regulatory element involved in light responsiveness
CsGRX46	G-Box	1118	1138	cis-acting regulatory element involved in light responsiveness
CsGRX47	GT1-motif	169	189	light responsive element
CsGRX47	GT1-motif	1111	1131	light responsive element
CsGRX47	ATCT-motif	305	325	part of a conserved DNA module involved in light responsiveness
CsGRX47	ACE	862	882	cis-acting element involved in light responsiveness
CsGRX47	G-Box	700	720	cis-acting regulatory element involved in light responsiveness
CsGRX47	G-Box	782	802	cis-acting regulatory element involved in light responsiveness
CsGRX47	G-Box	857	877	cis-acting regulatory element involved in light responsiveness
CsGRX47	Box 4	370	390	part of a conserved DNA module involved in light responsiveness
CsGRX47	Box 4	445	465	part of a conserved DNA module involved in light responsiveness
CsGRX49	Box 4	1230	1250	part of a conserved DNA module involved in light responsiveness
CsGRX49	Box 4	1618	1638	part of a conserved DNA module involved in light responsiveness
CsGRX49	GA-motif	1142	1162	part of a light responsive element
CsGRX49	GA-motif	1821	1841	part of a light responsive element
CsGRX49	TCT-motif	954	974	part of a light responsive element
CsGRX49	TCCC-motif	1570	1590	part of a light responsive element
CsGRX49	TCCC-motif	1678	1698	part of a light responsive element
CsGRX50	TCCC-motif	1169	1189	part of a light responsive element
CsGRX50	I-box	1738	1758	part of a light responsive element
CsGRX50	AE-box	976	996	part of a module for light response
CsGRX50	AE-box	1077	1097	part of a module for light response
CsGRX50	GATA-motif	1738	1758	part of a light responsive element
CsGRX51	TCT-motif	462	482	part of a light responsive element
CsGRX51	TCT-motif	470	490	part of a light responsive element
CsGRX51	AT1-motif	394	414	part of a light responsive module
CsGRX51	Box 4	227	247	part of a conserved DNA module involved in light responsiveness
CsGRX51	GT1-motif	111	131	light responsive element
CsGRX51	GT1-motif	112	132	light responsive element
CsGRX51	GT1-motif	1747	1767	light responsive element
CsGRX51	MRE	1758	1778	MYB binding site involved in light responsiveness
CsGRX52	TCT-motif	461	481	part of a light responsive element
CsGRX52	TCT-motif	469	489	part of a light responsive element
CsGRX52	AT1-motif	393	413	part of a light responsive module
CsGRX52	Box 4	226	246	part of a conserved DNA module involved in light responsiveness
CsGRX52	GT1-motif	110	130	light responsive element
CsGRX52	GT1-motif	111	131	light responsive element
CsGRX52	GT1-motif	1747	1767	light responsive element
CsGRX52	MRE	1758	1778	MYB binding site involved in light responsiveness
CsGRX54	Box 4	89	109	part of a conserved DNA module involved in light responsiveness
CsGRX54	Box 4	352	372	part of a conserved DNA module involved in light responsiveness
CsGRX54	Box 4	424	444	part of a conserved DNA module involved in light responsiveness
CsGRX54	Box 4	900	920	part of a conserved DNA module involved in light responsiveness
CsGRX54	Box 4	1157	1177	part of a conserved DNA module involved in light responsiveness
CsGRX54	Box 4	1535	1555	part of a conserved DNA module involved in light responsiveness
CsGRX54	G-box	334	354	cis-acting regulatory element involved in light responsiveness
CsGRX54	G-box	449	469	cis-acting regulatory element involved in light responsiveness
CsGRX54	G-box	1494	1514	cis-acting regulatory element involved in light responsiveness
CsGRX54	TCT-motif	840	860	part of a light responsive element
CsGRX54	AE-box	58	78	part of a module for light response
CsGRX54	G-Box	334	354	cis-acting regulatory element involved in light responsiveness
CsGRX54	G-Box	449	469	cis-acting regulatory element involved in light responsiveness
CsGRX56	GATA-motif	675	695	part of a light responsive element
CsGRX56	Box 4	52	72	part of a conserved DNA module involved in light responsiveness
CsGRX56	Box 4	56	76	part of a conserved DNA module involved in light responsiveness
CsGRX56	Box 4	589	609	part of a conserved DNA module involved in light responsiveness
CsGRX56	Box 4	1033	1053	part of a conserved DNA module involved in light responsiveness
CsGRX56	Box 4	1255	1275	part of a conserved DNA module involved in light responsiveness
CsGRX56	Box 4	1266	1286	part of a conserved DNA module involved in light responsiveness
CsGRX56	Box 4	1358	1378	part of a conserved DNA module involved in light responsiveness
CsGRX56	Box 4	1607	1627	part of a conserved DNA module involved in light responsiveness
CsGRX56	G-box	1705	1725	cis-acting regulatory element involved in light responsiveness
CsGRX56	TCT-motif	1195	1215	part of a light responsive element
CsGRX56	AT1-motif	208	228	part of a light responsive module
CsGRX56	G-Box	1705	1725	cis-acting regulatory element involved in light responsiveness
CsGRX56	GT1-motif	307	327	light responsive element
CsGRX56	GT1-motif	413	433	light responsive element
CsGRX56	GT1-motif	489	509	light responsive element
CsGRX56	GT1-motif	948	968	light responsive element
CsGRX9	G-Box	1718	1738	cis-acting regulatory element involved in light responsiveness
CsGRX9	MRE	1292	1312	MYB binding site involved in light responsiveness
CsGRX9	chs-CMA2a	1727	1747	part of a light responsive element
CsGRX9	ATC-motif	1136	1156	part of a conserved DNA module involved in light responsiveness
CsGRX9	GATA-motif	604	624	part of a light responsive element
CsGRX9	Box 4	1829	1849	part of a conserved DNA module involved in light responsiveness
CsGRX1	GT1-motif	1457	1477	light responsive element
CsGRX1	Box II	431	451	part of a light responsive element
CsGRX1	Box II	432	452	part of a light responsive element
CsGRX1	Box 4	1695	1715	part of a conserved DNA module involved in light responsiveness
CsGRX1	TCT-motif	1200	1220	part of a light responsive element
CsGRX1	MRE	1025	1045	MYB binding site involved in light responsiveness
CsGRX1	TCCC-motif	607	627	part of a light responsive element
CsGRX1	TCCC-motif	1515	1535	part of a light responsive element
CsGRX1	G-Box	264	284	cis-acting regulatory element involved in light responsiveness
CsGRX1	G-Box	433	453	cis-acting regulatory element involved in light responsiveness
CsGRX1	G-Box	571	591	cis-acting regulatory element involved in light responsiveness
CsGRX1	G-Box	840	860	cis-acting regulatory element involved in light responsiveness
CsGRX1	G-Box	1098	1118	cis-acting regulatory element involved in light responsiveness
CsGRX1	G-Box	1195	1215	cis-acting regulatory element involved in light responsiveness
CsGRX1	G-box	428	448	cis-acting regulatory element involved in light responsiveness
CsGRX1	G-box	431	451	cis-acting regulatory element involved in light responsiveness
CsGRX1	G-box	433	453	cis-acting regulatory element involved in light responsiveness
CsGRX1	G-box	1096	1116	cis-acting regulatory element involved in light responsiveness
CsGRX1	G-box	1098	1118	cis-acting regulatory element involved in light responsiveness
CsGRX1	G-box	1194	1214	cis-acting regulatory element involved in light responsiveness
CsGRX1	G-box	1195	1215	cis-acting regulatory element involved in light responsiveness
CsGRX1	ATCT-motif	583	603	part of a conserved DNA module involved in light responsiveness
CsGRX1	GATA-motif	642	662	part of a light responsive element
CsGRX29	Box 4	450	470	part of a conserved DNA module involved in light responsiveness
CsGRX29	Box 4	676	696	part of a conserved DNA module involved in light responsiveness
CsGRX29	Box 4	807	827	part of a conserved DNA module involved in light responsiveness
CsGRX29	CAG-motif	1918	1938	part of a light response element
CsGRX29	GT1-motif	1451	1471	light responsive element
CsGRX29	G-Box	491	511	cis-acting regulatory element involved in light responsiveness
CsGRX29	G-Box	766	786	cis-acting regulatory element involved in light responsiveness
CsGRX29	G-Box	947	967	cis-acting regulatory element involved in light responsiveness
CsGRX29	G-Box	1588	1608	cis-acting regulatory element involved in light responsiveness
CsGRX29	G-Box	1636	1656	cis-acting regulatory element involved in light responsiveness
CsGRX29	G-Box	1742	1762	cis-acting regulatory element involved in light responsiveness
CsGRX29	G-box	1740	1760	cis-acting regulatory element involved in light responsiveness
CsGRX29	ACE	317	337	cis-acting element involved in light responsiveness
CsGRX29	GATA-motif	1655	1675	part of a light responsive element
CsGRX48	TCT-motif	1004	1024	part of a light responsive element
CsGRX48	GA-motif	1888	1908	part of a light responsive element
CsGRX48	TCCC-motif	1115	1135	part of a light responsive element
CsGRX48	MRE	868	888	MYB binding site involved in light responsiveness
CsGRX48	GT1-motif	1241	1261	light responsive element
CsGRX48	GT1-motif	1242	1262	light responsive element
CsGRX48	Box 4	268	288	part of a conserved DNA module involved in light responsiveness
CsGRX48	Box 4	645	665	part of a conserved DNA module involved in light responsiveness
CsGRX48	Box 4	1580	1600	part of a conserved DNA module involved in light responsiveness
CsGRX48	Box 4	1722	1742	part of a conserved DNA module involved in light responsiveness
CsGRX48	I-box	484	504	part of a light responsive element
CsGRX48	Gap-box	1935	1955	part of a light responsive element
CsGRX48	G-box	1530	1550	cis-acting regulatory element involved in light responsiveness
CsGRX48	ATC-motif	961	981	part of a conserved DNA module involved in light responsiveness
CsGRX5	TCT-motif	1275	1295	part of a light responsive element
CsGRX5	TCCC-motif	542	562	part of a light responsive element
CsGRX5	TCCC-motif	1027	1047	part of a light responsive element
CsGRX5	GT1-motif	1462	1482	light responsive element
CsGRX5	Box 4	270	290	part of a conserved DNA module involved in light responsiveness
CsGRX5	Box 4	680	700	part of a conserved DNA module involved in light responsiveness
CsGRX5	Box 4	724	744	part of a conserved DNA module involved in light responsiveness
CsGRX5	Box 4	728	748	part of a conserved DNA module involved in light responsiveness
CsGRX5	Box 4	1368	1388	part of a conserved DNA module involved in light responsiveness
CsGRX5	GATA-motif	608	628	part of a light responsive element
CsGRX5	I-box	546	566	part of a light responsive element
CsGRX5	chs-CMA1a	111	131	part of a light responsive element
CsGRX5	G-box	558	578	cis-acting regulatory element involved in light responsiveness
CsGRX5	G-box	1184	1204	cis-acting regulatory element involved in light responsiveness
CsGRX5	G-box	1866	1886	cis-acting regulatory element involved in light responsiveness
CsGRX5	ACE	556	576	cis-acting element involved in light responsiveness
CsGRX55	GATA-motif	974	994	part of a light responsive element
CsGRX55	I-box	1884	1904	part of a light responsive element
CsGRX55	G-box	395	415	cis-acting regulatory element involved in light responsiveness
CsGRX55	G-box	400	420	cis-acting regulatory element involved in light responsiveness
CsGRX55	G-box	405	425	cis-acting regulatory element involved in light responsiveness
CsGRX55	G-box	410	430	cis-acting regulatory element involved in light responsiveness
CsGRX55	G-Box	1823	1843	cis-acting regulatory element involved in light responsiveness
CsGRX55	MRE	1611	1631	MYB binding site involved in light responsiveness
CsGRX55	MRE	1653	1673	MYB binding site involved in light responsiveness
CsGRX55	GA-motif	978	998	part of a light responsive element
CsGRX55	chs-Unit 1 m1	1612	1632	part of a light responsive element
CsGRX55	chs-Unit 1 m1	1654	1674	part of a light responsive element
CsGRX55	Sp1	1872	1892	light responsive element
CsGRX6	TCCC-motif	562	582	part of a light responsive element
CsGRX6	TCCC-motif	1032	1052	part of a light responsive element
CsGRX6	TCCC-motif	1039	1059	part of a light responsive element
CsGRX6	TCCC-motif	1061	1081	part of a light responsive element
CsGRX6	TCT-motif	1461	1481	part of a light responsive element
CsGRX6	Box 4	275	295	part of a conserved DNA module involved in light responsiveness
CsGRX6	Box 4	699	719	part of a conserved DNA module involved in light responsiveness
CsGRX6	Box 4	743	763	part of a conserved DNA module involved in light responsiveness
CsGRX6	Box 4	747	767	part of a conserved DNA module involved in light responsiveness
CsGRX6	Box 4	891	911	part of a conserved DNA module involved in light responsiveness
CsGRX6	Box 4	1554	1574	part of a conserved DNA module involved in light responsiveness
CsGRX6	GATA-motif	627	647	part of a light responsive element
CsGRX6	AT1-motif	1748	1768	part of a light responsive module
CsGRX6	chs-CMA1a	116	136	part of a light responsive element
CsGRX6	ACE	575	595	cis-acting element involved in light responsiveness
CsGRX6	G-box	577	597	cis-acting regulatory element involved in light responsiveness
CsGRX7	GA-motif	1176	1196	part of a light responsive element
CsGRX7	chs-Unit 1 m1	1647	1667	part of a light responsive element
CsGRX7	chs-Unit 1 m1	1681	1701	part of a light responsive element
CsGRX7	G-Box	635	655	cis-acting regulatory element involved in light responsiveness
CsGRX7	MRE	899	919	MYB binding site involved in light responsiveness
CsGRX7	MRE	1646	1666	MYB binding site involved in light responsiveness
CsGRX7	MRE	1680	1700	MYB binding site involved in light responsiveness
CsGRX7	Sp1	1872	1892	light responsive element
CsGRX7	GT1-motif	1229	1249	light responsive element
CsGRX7	Box 4	864	884	part of a conserved DNA module involved in light responsiveness
CsGRX7	Box 4	1093	1113	part of a conserved DNA module involved in light responsiveness
CsGRX7	GATA-motif	42	62	part of a light responsive element
CsGRX7	I-box	1174	1194	part of a light responsive element
CsGRX7	I-box	1884	1904	part of a light responsive element
CsGRX7	G-box	1087	1107	cis-acting regulatory element involved in light responsiveness
CsGRX8	TCT-motif	590	610	part of a light responsive element
CsGRX8	Box 4	1711	1731	part of a conserved DNA module involved in light responsiveness
CsGRX8	Box 4	1727	1747	part of a conserved DNA module involved in light responsiveness
CsGRX8	Box 4	1731	1751	part of a conserved DNA module involved in light responsiveness
CsGRX8	Box 4	1767	1787	part of a conserved DNA module involved in light responsiveness
CsGRX8	GATA-motif	307	327	part of a light responsive element
CsGRX8	G-box	593	613	cis-acting regulatory element involved in light responsiveness
CsGRX10	AT1-motif	451	471	part of a light responsive module
CsGRX10	AT1-motif	1247	1267	part of a light responsive module
CsGRX10	GT1-motif	467	487	light responsive element
CsGRX10	GT1-motif	1356	1376	light responsive element
CsGRX10	G-Box	20	40	cis-acting regulatory element involved in light responsiveness
CsGRX10	G-Box	58	78	cis-acting regulatory element involved in light responsiveness
CsGRX10	G-Box	73	93	cis-acting regulatory element involved in light responsiveness
CsGRX10	G-Box	1613	1633	cis-acting regulatory element involved in light responsiveness
CsGRX10	G-Box	1628	1648	cis-acting regulatory element involved in light responsiveness
CsGRX10	G-Box	1665	1685	cis-acting regulatory element involved in light responsiveness
CsGRX10	4cl-CMA2b	1529	1549	light responsive element
CsGRX10	Box 4	475	495	part of a conserved DNA module involved in light responsiveness
CsGRX10	Box 4	816	836	part of a conserved DNA module involved in light responsiveness
CsGRX10	Box 4	889	909	part of a conserved DNA module involved in light responsiveness
CsGRX10	Box 4	1231	1251	part of a conserved DNA module involved in light responsiveness
CsGRX10	TCT-motif	550	570	part of a light responsive element
CsGRX10	TCT-motif	1157	1177	part of a light responsive element
CsGRX10	MRE	1819	1839	MYB binding site involved in light responsiveness
CsGRX11	TCT-motif	234	254	part of a light responsive element
CsGRX11	Box 4	267	287	part of a conserved DNA module involved in light responsiveness
CsGRX11	Box 4	322	342	part of a conserved DNA module involved in light responsiveness
CsGRX11	Box 4	855	875	part of a conserved DNA module involved in light responsiveness
CsGRX11	Box 4	897	917	part of a conserved DNA module involved in light responsiveness
CsGRX11	Box 4	1044	1064	part of a conserved DNA module involved in light responsiveness
CsGRX11	Box 4	1600	1620	part of a conserved DNA module involved in light responsiveness
CsGRX11	GATA-motif	1032	1052	part of a light responsive element
CsGRX11	ATC-motif	249	269	part of a conserved DNA module involved in light responsiveness
CsGRX11	AE-box	1940	1960	part of a module for light response
CsGRX11	GT1-motif	949	969	light responsive element
CsGRX11	GT1-motif	1235	1255	light responsive element
CsGRX11	G-Box	769	789	cis-acting regulatory element involved in light responsiveness
CsGRX11	G-Box	1863	1883	cis-acting regulatory element involved in light responsiveness
CsGRX11	G-box	769	789	cis-acting regulatory element involved in light responsiveness
CsGRX11	ATCT-motif	201	221	part of a conserved DNA module involved in light responsiveness
CsGRX19	G-box	727	747	cis-acting regulatory element involved in light responsiveness
CsGRX19	G-box	729	749	cis-acting regulatory element involved in light responsiveness
CsGRX19	G-box	730	750	cis-acting regulatory element involved in light responsiveness
CsGRX19	G-box	732	752	cis-acting regulatory element involved in light responsiveness
CsGRX19	I-box	564	584	part of a light responsive element
CsGRX19	Box 4	183	203	part of a conserved DNA module involved in light responsiveness
CsGRX19	Box 4	220	240	part of a conserved DNA module involved in light responsiveness
CsGRX19	Box 4	288	308	part of a conserved DNA module involved in light responsiveness
CsGRX19	Box 4	312	332	part of a conserved DNA module involved in light responsiveness
CsGRX19	Box 4	468	488	part of a conserved DNA module involved in light responsiveness
CsGRX19	Box 4	917	937	part of a conserved DNA module involved in light responsiveness
CsGRX19	Box 4	1044	1064	part of a conserved DNA module involved in light responsiveness
CsGRX19	Box 4	1326	1346	part of a conserved DNA module involved in light responsiveness
CsGRX19	Box 4	1628	1648	part of a conserved DNA module involved in light responsiveness
CsGRX19	Box II	273	293	part of a light responsive element
CsGRX19	G-Box	732	752	cis-acting regulatory element involved in light responsiveness
CsGRX2	GATA-motif	1920	1940	part of a light responsive element
CsGRX2	Box 4	255	275	part of a conserved DNA module involved in light responsiveness
CsGRX2	Box 4	1637	1657	part of a conserved DNA module involved in light responsiveness
CsGRX2	Box 4	1697	1717	part of a conserved DNA module involved in light responsiveness
CsGRX2	GT1-motif	871	891	light responsive element
CsGRX22	GT1-motif	1638	1658	light responsive element
CsGRX22	chs-CMA1a	959	979	part of a light responsive element
CsGRX22	Sp1	1626	1646	light responsive element
CsGRX22	Sp1	1662	1682	light responsive element
CsGRX22	G-box	1845	1865	cis-acting regulatory element involved in light responsiveness
CsGRX22	TCT-motif	314	334	part of a light responsive element
CsGRX22	MRE	1329	1349	MYB binding site involved in light responsiveness
CsGRX22	GATA-motif	452	472	part of a light responsive element
CsGRX22	Box 4	670	690	part of a conserved DNA module involved in light responsiveness
CsGRX22	Box 4	880	900	part of a conserved DNA module involved in light responsiveness
CsGRX22	Box 4	972	992	part of a conserved DNA module involved in light responsiveness
CsGRX22	Box 4	1388	1408	part of a conserved DNA module involved in light responsiveness
CsGRX22	Box 4	1600	1620	part of a conserved DNA module involved in light responsiveness
CsGRX22	Box 4	1685	1705	part of a conserved DNA module involved in light responsiveness
CsGRX26	LAMP-element	224	244	part of a light responsive element
CsGRX26	MRE	1763	1783	MYB binding site involved in light responsiveness
CsGRX26	Box 4	519	539	part of a conserved DNA module involved in light responsiveness
CsGRX26	Box 4	1596	1616	part of a conserved DNA module involved in light responsiveness
CsGRX26	Box 4	1770	1790	part of a conserved DNA module involved in light responsiveness
CsGRX26	GATA-motif	122	142	part of a light responsive element
CsGRX26	GATA-motif	1361	1381	part of a light responsive element
CsGRX26	G-Box	179	199	cis-acting regulatory element involved in light responsiveness
CsGRX26	G-Box	278	298	cis-acting regulatory element involved in light responsiveness
CsGRX26	GT1-motif	62	82	light responsive element
CsGRX26	GT1-motif	1000	1020	light responsive element
CsGRX26	GT1-motif	1001	1021	light responsive element
CsGRX26	GT1-motif	1068	1088	light responsive element
CsGRX26	G-box	1322	1342	cis-acting regulatory element involved in light responsiveness
CsGRX26	AT1-motif	1296	1316	part of a light responsive module
CsGRX26	Sp1	1863	1883	light responsive element
CsGRX27	G-Box	161	181	cis-acting regulatory element involved in light responsiveness
CsGRX27	Sp1	1857	1877	light responsive element
CsGRX27	ATCT-motif	597	617	part of a conserved DNA module involved in light responsiveness
CsGRX27	TCT-motif	1268	1288	part of a light responsive element
CsGRX27	Box 4	567	587	part of a conserved DNA module involved in light responsiveness
CsGRX27	Box 4	756	776	part of a conserved DNA module involved in light responsiveness
CsGRX27	Box 4	1056	1076	part of a conserved DNA module involved in light responsiveness
CsGRX27	Box 4	1308	1328	part of a conserved DNA module involved in light responsiveness
CsGRX28	ATCT-motif	1486	1506	part of a conserved DNA module involved in light responsiveness
CsGRX28	I-box	733	753	part of a light responsive element
CsGRX28	GATA-motif	735	755	part of a light responsive element
CsGRX28	Box 4	1285	1305	part of a conserved DNA module involved in light responsiveness
CsGRX28	chs-CMA2b	147	167	part of a light responsive element
CsGRX28	TCT-motif	985	1005	part of a light responsive element
CsGRX28	LAMP-element	1184	1204	part of a light responsive element
CsGRX3	GT1-motif	872	892	light responsive element
CsGRX3	GATA-motif	1920	1940	part of a light responsive element
CsGRX3	Box 4	255	275	part of a conserved DNA module involved in light responsiveness
CsGRX3	Box 4	1633	1653	part of a conserved DNA module involved in light responsiveness
CsGRX3	Box 4	1693	1713	part of a conserved DNA module involved in light responsiveness
CsGRX30	GT1-motif	1232	1252	light responsive element
CsGRX30	G-box	402	422	cis-acting regulatory element involved in light responsiveness
CsGRX30	AT1-motif	1066	1086	part of a light responsive module
CsGRX30	TCT-motif	770	790	part of a light responsive element
CsGRX30	TCT-motif	820	840	part of a light responsive element
CsGRX30	TCT-motif	1397	1417	part of a light responsive element
CsGRX30	GA-motif	1640	1660	part of a light responsive element
CsGRX30	GATA-motif	1060	1080	part of a light responsive element
CsGRX30	Box 4	1774	1794	part of a conserved DNA module involved in light responsiveness
CsGRX53	Box 4	32	52	part of a conserved DNA module involved in light responsiveness
CsGRX53	Box 4	235	255	part of a conserved DNA module involved in light responsiveness
CsGRX53	Box 4	272	292	part of a conserved DNA module involved in light responsiveness
CsGRX53	Box 4	340	360	part of a conserved DNA module involved in light responsiveness
CsGRX53	Box 4	364	384	part of a conserved DNA module involved in light responsiveness
CsGRX53	Box 4	519	539	part of a conserved DNA module involved in light responsiveness
CsGRX53	Box 4	966	986	part of a conserved DNA module involved in light responsiveness
CsGRX53	Box 4	1091	1111	part of a conserved DNA module involved in light responsiveness
CsGRX53	Box 4	1368	1388	part of a conserved DNA module involved in light responsiveness
CsGRX53	Box 4	1668	1688	part of a conserved DNA module involved in light responsiveness
CsGRX53	P-box	795	815	gibberellin-responsive element and part of a light responsive element
CsGRX53	G-box	777	797	cis-acting regulatory element involved in light responsiveness
CsGRX53	G-box	779	799	cis-acting regulatory element involved in light responsiveness
CsGRX53	G-box	780	800	cis-acting regulatory element involved in light responsiveness
CsGRX53	G-box	782	802	cis-acting regulatory element involved in light responsiveness
CsGRX53	I-box	615	635	part of a light responsive element
CsGRX53	Box II	325	345	part of a light responsive element
CsGRX53	G-Box	782	802	cis-acting regulatory element involved in light responsiveness
CsGRX57	3-AF1 binding site	1409	1429	light responsive element
CsGRX57	GT1-motif	570	590	light responsive element
CsGRX57	AT1-motif	848	868	part of a light responsive module
CsGRX57	G-box	1849	1869	cis-acting regulatory element involved in light responsiveness
CsGRX57	I-box	727	747	part of a light responsive element
CsGRX57	TCCC-motif	1214	1234	part of a light responsive element
CsGRX57	MRE	261	281	MYB binding site involved in light responsiveness
CsGRX57	MRE	585	605	MYB binding site involved in light responsiveness
CsGRX57	TCT-motif	804	824	part of a light responsive element
CsGRX57	TCT-motif	1010	1030	part of a light responsive element
CsGRX57	Box 4	320	340	part of a conserved DNA module involved in light responsiveness
CsGRX57	Box 4	966	986	part of a conserved DNA module involved in light responsiveness
CsGRX57	Box 4	1080	1100	part of a conserved DNA module involved in light responsiveness
CsGRX57	Box 4	1386	1406	part of a conserved DNA module involved in light responsiveness
CsGRX57	Box 4	1445	1465	part of a conserved DNA module involved in light responsiveness
CsGRX58	G-box	1677	1697	cis-acting regulatory element involved in light responsiveness
CsGRX58	TCCC-motif	123	143	part of a light responsive element
CsGRX58	AE-box	889	909	part of a module for light response
CsGRX58	AE-box	1409	1429	part of a module for light response
CsGRX58	Box 4	1709	1729	part of a conserved DNA module involved in light responsiveness
CsGRX58	Box 4	1959	1979	part of a conserved DNA module involved in light responsiveness
CsGRX59	Box 4	1603	1623	part of a conserved DNA module involved in light responsiveness
CsGRX59	Box 4	1742	1762	part of a conserved DNA module involved in light responsiveness
CsGRX59	Box 4	1846	1866	part of a conserved DNA module involved in light responsiveness
CsGRX59	Box 4	1888	1908	part of a conserved DNA module involved in light responsiveness
CsGRX59	TCCC-motif	1088	1108	part of a light responsive element
CsGRX59	AE-box	774	794	part of a module for light response
CsGRX59	G-Box	1167	1187	cis-acting regulatory element involved in light responsiveness
CsGRX59	GT1-motif	915	935	light responsive element
CsGRL1	TGA-element	1020	1040	auxin-responsive element
CsGRL10	TGA-element	1813	1833	auxin-responsive element
CsGRL10	TGA-element	1819	1839	auxin-responsive element
CsGRL14	AuxRR-core	1418	1438	cis-acting regulatory element involved in auxin responsiveness
CsGRL15	AuxRR-core	1416	1436	cis-acting regulatory element involved in auxin responsiveness
CsGRL19	TGA-box	853	873	part of an auxin-responsive element
CsGRL2	TGA-element	1387	1407	auxin-responsive element
CsGRL25	TGA-element	1393	1413	auxin-responsive element
CsGRL4	TGA-element	1486	1506	auxin-responsive element
CsGRL5	TGA-element	418	438	auxin-responsive element
CsGRL6	TGA-element	1395	1415	auxin-responsive element
CsGRL7	TGA-element	1924	1944	auxin-responsive element
CsGRL9	TGA-element	1191	1211	auxin-responsive element
CsGRX12	AuxRR-core	330	350	cis-acting regulatory element involved in auxin responsiveness
CsGRX12	TGA-element	463	483	auxin-responsive element
CsGRX14	AuxRR-core	281	301	cis-acting regulatory element involved in auxin responsiveness
CsGRX18	TGA-element	1299	1319	auxin-responsive element
CsGRX20	TGA-box	1819	1839	part of an auxin-responsive element
CsGRX20	TGA-element	1753	1773	auxin-responsive element
CsGRX21	TGA-box	1790	1810	part of an auxin-responsive element
CsGRX23	TGA-box	1849	1869	part of an auxin-responsive element
CsGRX25	TGA-element	832	852	auxin-responsive element
CsGRX25	TGA-element	858	878	auxin-responsive element
CsGRX32	AuxRR-core	679	699	cis-acting regulatory element involved in auxin responsiveness
CsGRX34	TGA-element	1101	1121	auxin-responsive element
CsGRX34	TGA-element	1967	1987	auxin-responsive element
CsGRX37	TGA-element	1115	1135	auxin-responsive element
CsGRX37	TGA-element	1967	1987	auxin-responsive element
CsGRX39	TGA-element	247	267	auxin-responsive element
CsGRX40	TGA-element	1109	1129	auxin-responsive element
CsGRX44	AuxRR-core	752	772	cis-acting regulatory element involved in auxin responsiveness
CsGRX45	AuxRR-core	124	144	cis-acting regulatory element involved in auxin responsiveness
CsGRX47	TGA-box	7	27	part of an auxin-responsive element
CsGRX49	TGA-element	840	860	auxin-responsive element
CsGRX49	TGA-element	866	886	auxin-responsive element
CsGRX54	TGA-element	1604	1624	auxin-responsive element
CsGRX1	TGA-element	1744	1764	auxin-responsive element
CsGRX5	AuxRR-core	1230	1250	cis-acting regulatory element involved in auxin responsiveness
CsGRX5	AuxRR-core	1826	1846	cis-acting regulatory element involved in auxin responsiveness
CsGRX5	TGA-element	977	997	auxin-responsive element
CsGRX5	TGA-element	1082	1102	auxin-responsive element
CsGRX5	TGA-element	1088	1108	auxin-responsive element
CsGRX6	AuxRR-core	1826	1846	cis-acting regulatory element involved in auxin responsiveness
CsGRX6	TGA-element	1098	1118	auxin-responsive element
CsGRX6	TGA-element	1104	1124	auxin-responsive element
CsGRX7	TGA-element	1	21	auxin-responsive element
CsGRX10	TGA-element	1960	1980	auxin-responsive element
CsGRX58	TGA-element	387	407	auxin-responsive element
CsGRX58	AuxRR-core	107	127	cis-acting regulatory element involved in auxin responsiveness
CsGRX59	TGA-element	384	404	auxin-responsive element
CsGRX59	TGA-element	843	863	auxin-responsive element
CsGRL1	GARE-motif	1094	1114	gibberellin-responsive element
CsGRL10	GARE-motif	442	462	gibberellin-responsive element
CsGRL16	P-box	1430	1450	gibberellin-responsive element
CsGRL17	P-box	1434	1454	gibberellin-responsive element
CsGRL18	P-box	1880	1900	gibberellin-responsive element
CsGRL19	P-box	1878	1898	gibberellin-responsive element
CsGRL2	TATC-box	1401	1421	cis-acting element involved in gibberellin-responsiveness
CsGRL20	P-box	260	280	gibberellin-responsive element
CsGRL21	P-box	336	356	gibberellin-responsive element
CsGRL25	TATC-box	1407	1427	cis-acting element involved in gibberellin-responsiveness
CsGRL26	GARE-motif	694	714	gibberellin-responsive element
CsGRL26	GARE-motif	801	821	gibberellin-responsive element
CsGRL26	GARE-motif	1530	1550	gibberellin-responsive element
CsGRL26	P-box	290	310	gibberellin-responsive element
CsGRL3	GARE-motif	1688	1708	gibberellin-responsive element
CsGRL6	P-box	1262	1282	gibberellin-responsive element
CsGRL6	P-box	1434	1454	gibberellin-responsive element
CsGRL6	P-box	1676	1696	gibberellin-responsive element
CsGRL9	TATC-box	1428	1448	cis-acting element involved in gibberellin-responsiveness
CsGRX20	GARE-motif	580	600	gibberellin-responsive element
CsGRX20	GARE-motif	1534	1554	gibberellin-responsive element
CsGRX21	GARE-motif	1511	1531	gibberellin-responsive element
CsGRX24	GARE-motif	340	360	gibberellin-responsive element
CsGRX25	P-box	1444	1464	gibberellin-responsive element
CsGRX31	GARE-motif	1096	1116	gibberellin-responsive element
CsGRX32	GARE-motif	1798	1818	gibberellin-responsive element
CsGRX32	P-box	1759	1779	gibberellin-responsive element
CsGRX32	TATC-box	539	559	cis-acting element involved in gibberellin-responsiveness
CsGRX33	TATC-box	851	871	cis-acting element involved in gibberellin-responsiveness
CsGRX41	P-box	1561	1581	gibberellin-responsive element
CsGRX42	GARE-motif	438	458	gibberellin-responsive element
CsGRX42	TATC-box	1689	1709	cis-acting element involved in gibberellin-responsiveness
CsGRX45	TATC-box	1821	1841	cis-acting element involved in gibberellin-responsiveness
CsGRX46	TATC-box	1244	1264	cis-acting element involved in gibberellin-responsiveness
CsGRX46	TATC-box	1864	1884	cis-acting element involved in gibberellin-responsiveness
CsGRX49	P-box	1438	1458	gibberellin-responsive element
CsGRX50	GARE-motif	16	36	gibberellin-responsive element
CsGRX56	TATC-box	856	876	cis-acting element involved in gibberellin-responsiveness
CsGRX9	P-box	1561	1581	gibberellin-responsive element
CsGRX1	GARE-motif	1244	1264	gibberellin-responsive element
CsGRX1	TATC-box	46	66	cis-acting element involved in gibberellin-responsiveness
CsGRX48	GARE-motif	566	586	gibberellin-responsive element
CsGRX55	GARE-motif	82	102	gibberellin-responsive element
CsGRX55	GARE-motif	693	713	gibberellin-responsive element
CsGRX6	GARE-motif	734	754	gibberellin-responsive element
CsGRX26	GARE-motif	646	666	gibberellin-responsive element
CsGRX27	TATC-box	446	466	cis-acting element involved in gibberellin-responsiveness
CsGRX28	P-box	43	63	gibberellin-responsive element
CsGRX30	GARE-motif	678	698	gibberellin-responsive element
CsGRX53	P-box	795	815	gibberellin-responsive element and part of a light responsive element
CsGRX58	GARE-motif	646	666	gibberellin-responsive element
CsGRX59	GARE-motif	162	182	gibberellin-responsive element
CsGRL10	CGTCA-motif	252	272	cis-acting regulatory element involved in the MeJA-responsiveness
CsGRL10	CGTCA-motif	1733	1753	cis-acting regulatory element involved in the MeJA-responsiveness
CsGRL10	TGACG-motif	252	272	cis-acting regulatory element involved in the MeJA-responsiveness
CsGRL10	TGACG-motif	1733	1753	cis-acting regulatory element involved in the MeJA-responsiveness
CsGRL13	TGACG-motif	27	47	cis-acting regulatory element involved in the MeJA-responsiveness
CsGRL13	CGTCA-motif	27	47	cis-acting regulatory element involved in the MeJA-responsiveness
CsGRL16	TGACG-motif	1781	1801	cis-acting regulatory element involved in the MeJA-responsiveness
CsGRL16	CGTCA-motif	1781	1801	cis-acting regulatory element involved in the MeJA-responsiveness
CsGRL17	CGTCA-motif	1781	1801	cis-acting regulatory element involved in the MeJA-responsiveness
CsGRL17	TGACG-motif	1781	1801	cis-acting regulatory element involved in the MeJA-responsiveness
CsGRL19	CGTCA-motif	853	873	cis-acting regulatory element involved in the MeJA-responsiveness
CsGRL19	CGTCA-motif	1324	1344	cis-acting regulatory element involved in the MeJA-responsiveness
CsGRL19	TGACG-motif	853	873	cis-acting regulatory element involved in the MeJA-responsiveness
CsGRL19	TGACG-motif	1324	1344	cis-acting regulatory element involved in the MeJA-responsiveness
CsGRL2	CGTCA-motif	216	236	cis-acting regulatory element involved in the MeJA-responsiveness
CsGRL2	CGTCA-motif	1237	1257	cis-acting regulatory element involved in the MeJA-responsiveness
CsGRL2	TGACG-motif	216	236	cis-acting regulatory element involved in the MeJA-responsiveness
CsGRL2	TGACG-motif	1237	1257	cis-acting regulatory element involved in the MeJA-responsiveness
CsGRL21	TGACG-motif	917	937	cis-acting regulatory element involved in the MeJA-responsiveness
CsGRL21	CGTCA-motif	917	937	cis-acting regulatory element involved in the MeJA-responsiveness
CsGRL25	CGTCA-motif	228	248	cis-acting regulatory element involved in the MeJA-responsiveness
CsGRL25	CGTCA-motif	1243	1263	cis-acting regulatory element involved in the MeJA-responsiveness
CsGRL25	TGACG-motif	228	248	cis-acting regulatory element involved in the MeJA-responsiveness
CsGRL25	TGACG-motif	1243	1263	cis-acting regulatory element involved in the MeJA-responsiveness
CsGRL27	TGACG-motif	31	51	cis-acting regulatory element involved in the MeJA-responsiveness
CsGRL27	CGTCA-motif	31	51	cis-acting regulatory element involved in the MeJA-responsiveness
CsGRL3	TGACG-motif	1071	1091	cis-acting regulatory element involved in the MeJA-responsiveness
CsGRL3	TGACG-motif	1077	1097	cis-acting regulatory element involved in the MeJA-responsiveness
CsGRL3	CGTCA-motif	1071	1091	cis-acting regulatory element involved in the MeJA-responsiveness
CsGRL3	CGTCA-motif	1077	1097	cis-acting regulatory element involved in the MeJA-responsiveness
CsGRL4	CGTCA-motif	993	1013	cis-acting regulatory element involved in the MeJA-responsiveness
CsGRL4	CGTCA-motif	1063	1083	cis-acting regulatory element involved in the MeJA-responsiveness
CsGRL4	CGTCA-motif	1066	1086	cis-acting regulatory element involved in the MeJA-responsiveness
CsGRL4	CGTCA-motif	1150	1170	cis-acting regulatory element involved in the MeJA-responsiveness
CsGRL4	CGTCA-motif	1386	1406	cis-acting regulatory element involved in the MeJA-responsiveness
CsGRL4	CGTCA-motif	1976	1996	cis-acting regulatory element involved in the MeJA-responsiveness
CsGRL4	TGACG-motif	993	1013	cis-acting regulatory element involved in the MeJA-responsiveness
CsGRL4	TGACG-motif	1063	1083	cis-acting regulatory element involved in the MeJA-responsiveness
CsGRL4	TGACG-motif	1066	1086	cis-acting regulatory element involved in the MeJA-responsiveness
CsGRL4	TGACG-motif	1150	1170	cis-acting regulatory element involved in the MeJA-responsiveness
CsGRL4	TGACG-motif	1386	1406	cis-acting regulatory element involved in the MeJA-responsiveness
CsGRL4	TGACG-motif	1976	1996	cis-acting regulatory element involved in the MeJA-responsiveness
CsGRL6	CGTCA-motif	1533	1553	cis-acting regulatory element involved in the MeJA-responsiveness
CsGRL6	TGACG-motif	1533	1553	cis-acting regulatory element involved in the MeJA-responsiveness
CsGRL8	TGACG-motif	1677	1697	cis-acting regulatory element involved in the MeJA-responsiveness
CsGRL8	CGTCA-motif	1677	1697	cis-acting regulatory element involved in the MeJA-responsiveness
CsGRL9	CGTCA-motif	1682	1702	cis-acting regulatory element involved in the MeJA-responsiveness
CsGRL9	TGACG-motif	1682	1702	cis-acting regulatory element involved in the MeJA-responsiveness
CsGRX12	TGACG-motif	1251	1271	cis-acting regulatory element involved in the MeJA-responsiveness
CsGRX12	CGTCA-motif	1251	1271	cis-acting regulatory element involved in the MeJA-responsiveness
CsGRX13	TGACG-motif	826	846	cis-acting regulatory element involved in the MeJA-responsiveness
CsGRX13	TGACG-motif	1249	1269	cis-acting regulatory element involved in the MeJA-responsiveness
CsGRX13	CGTCA-motif	826	846	cis-acting regulatory element involved in the MeJA-responsiveness
CsGRX13	CGTCA-motif	1249	1269	cis-acting regulatory element involved in the MeJA-responsiveness
CsGRX14	CGTCA-motif	1251	1271	cis-acting regulatory element involved in the MeJA-responsiveness
CsGRX14	TGACG-motif	1251	1271	cis-acting regulatory element involved in the MeJA-responsiveness
CsGRX15	TGACG-motif	826	846	cis-acting regulatory element involved in the MeJA-responsiveness
CsGRX15	TGACG-motif	1250	1270	cis-acting regulatory element involved in the MeJA-responsiveness
CsGRX15	CGTCA-motif	826	846	cis-acting regulatory element involved in the MeJA-responsiveness
CsGRX15	CGTCA-motif	1250	1270	cis-acting regulatory element involved in the MeJA-responsiveness
CsGRX16	TGACG-motif	1552	1572	cis-acting regulatory element involved in the MeJA-responsiveness
CsGRX16	CGTCA-motif	1552	1572	cis-acting regulatory element involved in the MeJA-responsiveness
CsGRX17	CGTCA-motif	1674	1694	cis-acting regulatory element involved in the MeJA-responsiveness
CsGRX17	CGTCA-motif	1825	1845	cis-acting regulatory element involved in the MeJA-responsiveness
CsGRX17	TGACG-motif	1674	1694	cis-acting regulatory element involved in the MeJA-responsiveness
CsGRX17	TGACG-motif	1825	1845	cis-acting regulatory element involved in the MeJA-responsiveness
CsGRX18	TGACG-motif	1738	1758	cis-acting regulatory element involved in the MeJA-responsiveness
CsGRX18	TGACG-motif	1902	1922	cis-acting regulatory element involved in the MeJA-responsiveness
CsGRX18	CGTCA-motif	1738	1758	cis-acting regulatory element involved in the MeJA-responsiveness
CsGRX18	CGTCA-motif	1902	1922	cis-acting regulatory element involved in the MeJA-responsiveness
CsGRX20	TGACG-motif	1788	1808	cis-acting regulatory element involved in the MeJA-responsiveness
CsGRX20	TGACG-motif	1791	1811	cis-acting regulatory element involved in the MeJA-responsiveness
CsGRX20	TGACG-motif	1802	1822	cis-acting regulatory element involved in the MeJA-responsiveness
CsGRX20	TGACG-motif	1819	1839	cis-acting regulatory element involved in the MeJA-responsiveness
CsGRX20	TGACG-motif	1834	1854	cis-acting regulatory element involved in the MeJA-responsiveness
CsGRX20	TGACG-motif	1846	1866	cis-acting regulatory element involved in the MeJA-responsiveness
CsGRX20	CGTCA-motif	1788	1808	cis-acting regulatory element involved in the MeJA-responsiveness
CsGRX20	CGTCA-motif	1791	1811	cis-acting regulatory element involved in the MeJA-responsiveness
CsGRX20	CGTCA-motif	1802	1822	cis-acting regulatory element involved in the MeJA-responsiveness
CsGRX20	CGTCA-motif	1819	1839	cis-acting regulatory element involved in the MeJA-responsiveness
CsGRX20	CGTCA-motif	1834	1854	cis-acting regulatory element involved in the MeJA-responsiveness
CsGRX20	CGTCA-motif	1846	1866	cis-acting regulatory element involved in the MeJA-responsiveness
CsGRX21	CGTCA-motif	278	298	cis-acting regulatory element involved in the MeJA-responsiveness
CsGRX21	CGTCA-motif	1759	1779	cis-acting regulatory element involved in the MeJA-responsiveness
CsGRX21	CGTCA-motif	1762	1782	cis-acting regulatory element involved in the MeJA-responsiveness
CsGRX21	CGTCA-motif	1773	1793	cis-acting regulatory element involved in the MeJA-responsiveness
CsGRX21	CGTCA-motif	1790	1810	cis-acting regulatory element involved in the MeJA-responsiveness
CsGRX21	CGTCA-motif	1805	1825	cis-acting regulatory element involved in the MeJA-responsiveness
CsGRX21	CGTCA-motif	1817	1837	cis-acting regulatory element involved in the MeJA-responsiveness
CsGRX21	TGACG-motif	278	298	cis-acting regulatory element involved in the MeJA-responsiveness
CsGRX21	TGACG-motif	1759	1779	cis-acting regulatory element involved in the MeJA-responsiveness
CsGRX21	TGACG-motif	1762	1782	cis-acting regulatory element involved in the MeJA-responsiveness
CsGRX21	TGACG-motif	1773	1793	cis-acting regulatory element involved in the MeJA-responsiveness
CsGRX21	TGACG-motif	1790	1810	cis-acting regulatory element involved in the MeJA-responsiveness
CsGRX21	TGACG-motif	1805	1825	cis-acting regulatory element involved in the MeJA-responsiveness
CsGRX21	TGACG-motif	1817	1837	cis-acting regulatory element involved in the MeJA-responsiveness
CsGRX23	CGTCA-motif	238	258	cis-acting regulatory element involved in the MeJA-responsiveness
CsGRX23	CGTCA-motif	1831	1851	cis-acting regulatory element involved in the MeJA-responsiveness
CsGRX23	CGTCA-motif	1849	1869	cis-acting regulatory element involved in the MeJA-responsiveness
CsGRX23	CGTCA-motif	1864	1884	cis-acting regulatory element involved in the MeJA-responsiveness
CsGRX23	TGACG-motif	238	258	cis-acting regulatory element involved in the MeJA-responsiveness
CsGRX23	TGACG-motif	1831	1851	cis-acting regulatory element involved in the MeJA-responsiveness
CsGRX23	TGACG-motif	1849	1869	cis-acting regulatory element involved in the MeJA-responsiveness
CsGRX23	TGACG-motif	1864	1884	cis-acting regulatory element involved in the MeJA-responsiveness
CsGRX25	TGACG-motif	623	643	cis-acting regulatory element involved in the MeJA-responsiveness
CsGRX25	TGACG-motif	863	883	cis-acting regulatory element involved in the MeJA-responsiveness
CsGRX25	CGTCA-motif	623	643	cis-acting regulatory element involved in the MeJA-responsiveness
CsGRX25	CGTCA-motif	863	883	cis-acting regulatory element involved in the MeJA-responsiveness
CsGRX32	CGTCA-motif	225	245	cis-acting regulatory element involved in the MeJA-responsiveness
CsGRX32	CGTCA-motif	698	718	cis-acting regulatory element involved in the MeJA-responsiveness
CsGRX32	TGACG-motif	225	245	cis-acting regulatory element involved in the MeJA-responsiveness
CsGRX32	TGACG-motif	698	718	cis-acting regulatory element involved in the MeJA-responsiveness
CsGRX35	TGACG-motif	524	544	cis-acting regulatory element involved in the MeJA-responsiveness
CsGRX35	TGACG-motif	918	938	cis-acting regulatory element involved in the MeJA-responsiveness
CsGRX35	TGACG-motif	1254	1274	cis-acting regulatory element involved in the MeJA-responsiveness
CsGRX35	CGTCA-motif	524	544	cis-acting regulatory element involved in the MeJA-responsiveness
CsGRX35	CGTCA-motif	918	938	cis-acting regulatory element involved in the MeJA-responsiveness
CsGRX35	CGTCA-motif	1254	1274	cis-acting regulatory element involved in the MeJA-responsiveness
CsGRX36	TGACG-motif	623	643	cis-acting regulatory element involved in the MeJA-responsiveness
CsGRX36	TGACG-motif	837	857	cis-acting regulatory element involved in the MeJA-responsiveness
CsGRX36	TGACG-motif	1895	1915	cis-acting regulatory element involved in the MeJA-responsiveness
CsGRX36	CGTCA-motif	623	643	cis-acting regulatory element involved in the MeJA-responsiveness
CsGRX36	CGTCA-motif	837	857	cis-acting regulatory element involved in the MeJA-responsiveness
CsGRX36	CGTCA-motif	1895	1915	cis-acting regulatory element involved in the MeJA-responsiveness
CsGRX38	CGTCA-motif	527	547	cis-acting regulatory element involved in the MeJA-responsiveness
CsGRX38	CGTCA-motif	919	939	cis-acting regulatory element involved in the MeJA-responsiveness
CsGRX38	CGTCA-motif	1255	1275	cis-acting regulatory element involved in the MeJA-responsiveness
CsGRX38	TGACG-motif	527	547	cis-acting regulatory element involved in the MeJA-responsiveness
CsGRX38	TGACG-motif	919	939	cis-acting regulatory element involved in the MeJA-responsiveness
CsGRX38	TGACG-motif	1255	1275	cis-acting regulatory element involved in the MeJA-responsiveness
CsGRX39	CGTCA-motif	1378	1398	cis-acting regulatory element involved in the MeJA-responsiveness
CsGRX39	CGTCA-motif	1661	1681	cis-acting regulatory element involved in the MeJA-responsiveness
CsGRX39	TGACG-motif	1378	1398	cis-acting regulatory element involved in the MeJA-responsiveness
CsGRX39	TGACG-motif	1661	1681	cis-acting regulatory element involved in the MeJA-responsiveness
CsGRX40	TGACG-motif	662	682	cis-acting regulatory element involved in the MeJA-responsiveness
CsGRX40	TGACG-motif	1362	1382	cis-acting regulatory element involved in the MeJA-responsiveness
CsGRX40	TGACG-motif	1653	1673	cis-acting regulatory element involved in the MeJA-responsiveness
CsGRX40	CGTCA-motif	662	682	cis-acting regulatory element involved in the MeJA-responsiveness
CsGRX40	CGTCA-motif	1362	1382	cis-acting regulatory element involved in the MeJA-responsiveness
CsGRX40	CGTCA-motif	1653	1673	cis-acting regulatory element involved in the MeJA-responsiveness
CsGRX42	TGACG-motif	1368	1388	cis-acting regulatory element involved in the MeJA-responsiveness
CsGRX42	TGACG-motif	1651	1671	cis-acting regulatory element involved in the MeJA-responsiveness
CsGRX42	CGTCA-motif	1368	1388	cis-acting regulatory element involved in the MeJA-responsiveness
CsGRX42	CGTCA-motif	1651	1671	cis-acting regulatory element involved in the MeJA-responsiveness
CsGRX47	TGACG-motif	7	27	cis-acting regulatory element involved in the MeJA-responsiveness
CsGRX47	TGACG-motif	32	52	cis-acting regulatory element involved in the MeJA-responsiveness
CsGRX47	TGACG-motif	704	724	cis-acting regulatory element involved in the MeJA-responsiveness
CsGRX47	TGACG-motif	1562	1582	cis-acting regulatory element involved in the MeJA-responsiveness
CsGRX47	CGTCA-motif	7	27	cis-acting regulatory element involved in the MeJA-responsiveness
CsGRX47	CGTCA-motif	32	52	cis-acting regulatory element involved in the MeJA-responsiveness
CsGRX47	CGTCA-motif	704	724	cis-acting regulatory element involved in the MeJA-responsiveness
CsGRX47	CGTCA-motif	1562	1582	cis-acting regulatory element involved in the MeJA-responsiveness
CsGRX49	TGACG-motif	633	653	cis-acting regulatory element involved in the MeJA-responsiveness
CsGRX49	TGACG-motif	871	891	cis-acting regulatory element involved in the MeJA-responsiveness
CsGRX49	CGTCA-motif	633	653	cis-acting regulatory element involved in the MeJA-responsiveness
CsGRX49	CGTCA-motif	871	891	cis-acting regulatory element involved in the MeJA-responsiveness
CsGRX50	CGTCA-motif	414	434	cis-acting regulatory element involved in the MeJA-responsiveness
CsGRX50	CGTCA-motif	437	457	cis-acting regulatory element involved in the MeJA-responsiveness
CsGRX50	TGACG-motif	414	434	cis-acting regulatory element involved in the MeJA-responsiveness
CsGRX50	TGACG-motif	437	457	cis-acting regulatory element involved in the MeJA-responsiveness
CsGRX54	TGACG-motif	704	724	cis-acting regulatory element involved in the MeJA-responsiveness
CsGRX54	TGACG-motif	1496	1516	cis-acting regulatory element involved in the MeJA-responsiveness
CsGRX54	CGTCA-motif	704	724	cis-acting regulatory element involved in the MeJA-responsiveness
CsGRX54	CGTCA-motif	1496	1516	cis-acting regulatory element involved in the MeJA-responsiveness
CsGRX1	TGACG-motif	496	516	cis-acting regulatory element involved in the MeJA-responsiveness
CsGRX1	TGACG-motif	870	890	cis-acting regulatory element involved in the MeJA-responsiveness
CsGRX1	TGACG-motif	1142	1162	cis-acting regulatory element involved in the MeJA-responsiveness
CsGRX1	TGACG-motif	1464	1484	cis-acting regulatory element involved in the MeJA-responsiveness
CsGRX1	CGTCA-motif	496	516	cis-acting regulatory element involved in the MeJA-responsiveness
CsGRX1	CGTCA-motif	870	890	cis-acting regulatory element involved in the MeJA-responsiveness
CsGRX1	CGTCA-motif	1142	1162	cis-acting regulatory element involved in the MeJA-responsiveness
CsGRX1	CGTCA-motif	1464	1484	cis-acting regulatory element involved in the MeJA-responsiveness
CsGRX48	TGACG-motif	978	998	cis-acting regulatory element involved in the MeJA-responsiveness
CsGRX48	TGACG-motif	1529	1549	cis-acting regulatory element involved in the MeJA-responsiveness
CsGRX48	TGACG-motif	1877	1897	cis-acting regulatory element involved in the MeJA-responsiveness
CsGRX48	CGTCA-motif	978	998	cis-acting regulatory element involved in the MeJA-responsiveness
CsGRX48	CGTCA-motif	1529	1549	cis-acting regulatory element involved in the MeJA-responsiveness
CsGRX48	CGTCA-motif	1877	1897	cis-acting regulatory element involved in the MeJA-responsiveness
CsGRX5	TGACG-motif	1868	1888	cis-acting regulatory element involved in the MeJA-responsiveness
CsGRX5	CGTCA-motif	1868	1888	cis-acting regulatory element involved in the MeJA-responsiveness
CsGRX11	TGACG-motif	1875	1895	cis-acting regulatory element involved in the MeJA-responsiveness
CsGRX11	CGTCA-motif	1875	1895	cis-acting regulatory element involved in the MeJA-responsiveness
CsGRX22	TGACG-motif	1771	1791	cis-acting regulatory element involved in the MeJA-responsiveness
CsGRX22	TGACG-motif	1871	1891	cis-acting regulatory element involved in the MeJA-responsiveness
CsGRX22	CGTCA-motif	1771	1791	cis-acting regulatory element involved in the MeJA-responsiveness
CsGRX22	CGTCA-motif	1871	1891	cis-acting regulatory element involved in the MeJA-responsiveness
CsGRX26	TGACG-motif	382	402	cis-acting regulatory element involved in the MeJA-responsiveness
CsGRX26	CGTCA-motif	382	402	cis-acting regulatory element involved in the MeJA-responsiveness
CsGRX27	TGACG-motif	7	27	cis-acting regulatory element involved in the MeJA-responsiveness
CsGRX27	TGACG-motif	1365	1385	cis-acting regulatory element involved in the MeJA-responsiveness
CsGRX27	TGACG-motif	1435	1455	cis-acting regulatory element involved in the MeJA-responsiveness
CsGRX27	TGACG-motif	1486	1506	cis-acting regulatory element involved in the MeJA-responsiveness
CsGRX27	CGTCA-motif	7	27	cis-acting regulatory element involved in the MeJA-responsiveness
CsGRX27	CGTCA-motif	1365	1385	cis-acting regulatory element involved in the MeJA-responsiveness
CsGRX27	CGTCA-motif	1435	1455	cis-acting regulatory element involved in the MeJA-responsiveness
CsGRX27	CGTCA-motif	1486	1506	cis-acting regulatory element involved in the MeJA-responsiveness
CsGRX28	CGTCA-motif	754	774	cis-acting regulatory element involved in the MeJA-responsiveness
CsGRX28	CGTCA-motif	1664	1684	cis-acting regulatory element involved in the MeJA-responsiveness
CsGRX28	CGTCA-motif	1944	1964	cis-acting regulatory element involved in the MeJA-responsiveness
CsGRX28	TGACG-motif	754	774	cis-acting regulatory element involved in the MeJA-responsiveness
CsGRX28	TGACG-motif	1664	1684	cis-acting regulatory element involved in the MeJA-responsiveness
CsGRX28	TGACG-motif	1944	1964	cis-acting regulatory element involved in the MeJA-responsiveness
CsGRX57	TGACG-motif	1775	1795	cis-acting regulatory element involved in the MeJA-responsiveness
CsGRX57	TGACG-motif	1875	1895	cis-acting regulatory element involved in the MeJA-responsiveness
CsGRX57	CGTCA-motif	1775	1795	cis-acting regulatory element involved in the MeJA-responsiveness
CsGRX57	CGTCA-motif	1875	1895	cis-acting regulatory element involved in the MeJA-responsiveness
CsGRX58	CGTCA-motif	1774	1794	cis-acting regulatory element involved in the MeJA-responsiveness
CsGRX58	CGTCA-motif	1873	1893	cis-acting regulatory element involved in the MeJA-responsiveness
CsGRX58	TGACG-motif	1774	1794	cis-acting regulatory element involved in the MeJA-responsiveness
CsGRX58	TGACG-motif	1873	1893	cis-acting regulatory element involved in the MeJA-responsiveness
CsGRL1	ABRE	237	257	cis-acting element involved in the abscisic acid responsiveness
CsGRL1	ABRE	458	478	cis-acting element involved in the abscisic acid responsiveness
CsGRL1	ABRE	459	479	cis-acting element involved in the abscisic acid responsiveness
CsGRL13	ABRE	518	538	cis-acting element involved in the abscisic acid responsiveness
CsGRL14	ABRE	233	253	cis-acting element involved in the abscisic acid responsiveness
CsGRL14	ABRE	234	254	cis-acting element involved in the abscisic acid responsiveness
CsGRL14	ABRE	524	544	cis-acting element involved in the abscisic acid responsiveness
CsGRL15	ABRE	176	196	cis-acting element involved in the abscisic acid responsiveness
CsGRL15	ABRE	177	197	cis-acting element involved in the abscisic acid responsiveness
CsGRL15	ABRE	232	252	cis-acting element involved in the abscisic acid responsiveness
CsGRL15	ABRE	233	253	cis-acting element involved in the abscisic acid responsiveness
CsGRL15	ABRE	522	542	cis-acting element involved in the abscisic acid responsiveness
CsGRL16	ABRE	1468	1488	cis-acting element involved in the abscisic acid responsiveness
CsGRL16	ABRE	1469	1489	cis-acting element involved in the abscisic acid responsiveness
CsGRL16	ABRE	1724	1744	cis-acting element involved in the abscisic acid responsiveness
CsGRL16	ABRE	1725	1745	cis-acting element involved in the abscisic acid responsiveness
CsGRL16	ABRE	1779	1799	cis-acting element involved in the abscisic acid responsiveness
CsGRL17	ABRE	1472	1492	cis-acting element involved in the abscisic acid responsiveness
CsGRL17	ABRE	1473	1493	cis-acting element involved in the abscisic acid responsiveness
CsGRL17	ABRE	1724	1744	cis-acting element involved in the abscisic acid responsiveness
CsGRL17	ABRE	1725	1745	cis-acting element involved in the abscisic acid responsiveness
CsGRL17	ABRE	1779	1799	cis-acting element involved in the abscisic acid responsiveness
CsGRL18	ABRE	47	67	cis-acting element involved in the abscisic acid responsiveness
CsGRL18	ABRE	48	68	cis-acting element involved in the abscisic acid responsiveness
CsGRL19	ABRE	897	917	cis-acting element involved in the abscisic acid responsiveness
CsGRL23	ABRE	534	554	cis-acting element involved in the abscisic acid responsiveness
CsGRL26	ABRE	633	653	cis-acting element involved in the abscisic acid responsiveness
CsGRL26	ABRE	1008	1028	cis-acting element involved in the abscisic acid responsiveness
CsGRL27	ABRE	527	547	cis-acting element involved in the abscisic acid responsiveness
CsGRL3	ABRE	372	392	cis-acting element involved in the abscisic acid responsiveness
CsGRL3	ABRE	1033	1053	cis-acting element involved in the abscisic acid responsiveness
CsGRL4	ABRE	456	476	cis-acting element involved in the abscisic acid responsiveness
CsGRL4	ABRE	1869	1889	cis-acting element involved in the abscisic acid responsiveness
CsGRL5	ABRE	1153	1173	cis-acting element involved in the abscisic acid responsiveness
CsGRL6	ABRE	1199	1219	cis-acting element involved in the abscisic acid responsiveness
CsGRL6	ABRE	1372	1392	cis-acting element involved in the abscisic acid responsiveness
CsGRL7	ABRE	1847	1867	cis-acting element involved in the abscisic acid responsiveness
CsGRL9	ABRE	982	1002	cis-acting element involved in the abscisic acid responsiveness
CsGRX13	ABRE	843	863	cis-acting element involved in the abscisic acid responsiveness
CsGRX13	ABRE	1247	1267	cis-acting element involved in the abscisic acid responsiveness
CsGRX13	ABRE	1661	1681	cis-acting element involved in the abscisic acid responsiveness
CsGRX15	ABRE	843	863	cis-acting element involved in the abscisic acid responsiveness
CsGRX15	ABRE	1248	1268	cis-acting element involved in the abscisic acid responsiveness
CsGRX15	ABRE	1662	1682	cis-acting element involved in the abscisic acid responsiveness
CsGRX16	ABRE	266	286	cis-acting element involved in the abscisic acid responsiveness
CsGRX16	ABRE	1526	1546	cis-acting element involved in the abscisic acid responsiveness
CsGRX17	ABRE	1648	1668	cis-acting element involved in the abscisic acid responsiveness
CsGRX18	ABRE	846	866	cis-acting element involved in the abscisic acid responsiveness
CsGRX18	ABRE	1712	1732	cis-acting element involved in the abscisic acid responsiveness
CsGRX20	ABRE	377	397	cis-acting element involved in the abscisic acid responsiveness
CsGRX20	ABRE	457	477	cis-acting element involved in the abscisic acid responsiveness
CsGRX20	ABRE	1800	1820	cis-acting element involved in the abscisic acid responsiveness
CsGRX21	ABRE	295	315	cis-acting element involved in the abscisic acid responsiveness
CsGRX21	ABRE	1771	1791	cis-acting element involved in the abscisic acid responsiveness
CsGRX23	ABRE	1829	1849	cis-acting element involved in the abscisic acid responsiveness
CsGRX31	ABRE	171	191	cis-acting element involved in the abscisic acid responsiveness
CsGRX31	ABRE	1702	1722	cis-acting element involved in the abscisic acid responsiveness
CsGRX33	ABRE	1700	1720	cis-acting element involved in the abscisic acid responsiveness
CsGRX33	ABRE	1701	1721	cis-acting element involved in the abscisic acid responsiveness
CsGRX34	ABRE	1115	1135	cis-acting element involved in the abscisic acid responsiveness
CsGRX34	ABRE	1116	1136	cis-acting element involved in the abscisic acid responsiveness
CsGRX34	ABRE	1481	1501	cis-acting element involved in the abscisic acid responsiveness
CsGRX34	ABRE	1482	1502	cis-acting element involved in the abscisic acid responsiveness
CsGRX35	ABRE	947	967	cis-acting element involved in the abscisic acid responsiveness
CsGRX35	ABRE	1580	1600	cis-acting element involved in the abscisic acid responsiveness
CsGRX36	ABRE	398	418	cis-acting element involved in the abscisic acid responsiveness
CsGRX36	ABRE	400	420	cis-acting element involved in the abscisic acid responsiveness
CsGRX36	ABRE	401	421	cis-acting element involved in the abscisic acid responsiveness
CsGRX36	ABRE	527	547	cis-acting element involved in the abscisic acid responsiveness
CsGRX36	ABRE	1701	1721	cis-acting element involved in the abscisic acid responsiveness
CsGRX37	ABRE	1129	1149	cis-acting element involved in the abscisic acid responsiveness
CsGRX37	ABRE	1130	1150	cis-acting element involved in the abscisic acid responsiveness
CsGRX37	ABRE	1481	1501	cis-acting element involved in the abscisic acid responsiveness
CsGRX37	ABRE	1482	1502	cis-acting element involved in the abscisic acid responsiveness
CsGRX37	ABRE	1486	1506	cis-acting element involved in the abscisic acid responsiveness
CsGRX37	ABRE	1618	1638	cis-acting element involved in the abscisic acid responsiveness
CsGRX37	ABRE	1619	1639	cis-acting element involved in the abscisic acid responsiveness
CsGRX38	ABRE	948	968	cis-acting element involved in the abscisic acid responsiveness
CsGRX38	ABRE	1581	1601	cis-acting element involved in the abscisic acid responsiveness
CsGRX39	ABRE	357	377	cis-acting element involved in the abscisic acid responsiveness
CsGRX39	ABRE	1380	1400	cis-acting element involved in the abscisic acid responsiveness
CsGRX39	ABRE	1712	1732	cis-acting element involved in the abscisic acid responsiveness
CsGRX4	ABRE	376	396	cis-acting element involved in the abscisic acid responsiveness
CsGRX40	ABRE	1638	1658	cis-acting element involved in the abscisic acid responsiveness
CsGRX40	ABRE	1704	1724	cis-acting element involved in the abscisic acid responsiveness
CsGRX41	ABRE	1718	1738	cis-acting element involved in the abscisic acid responsiveness
CsGRX42	ABRE	1636	1656	cis-acting element involved in the abscisic acid responsiveness
CsGRX42	ABRE	1703	1723	cis-acting element involved in the abscisic acid responsiveness
CsGRX43	ABRE	69	89	cis-acting element involved in the abscisic acid responsiveness
CsGRX43	ABRE	190	210	cis-acting element involved in the abscisic acid responsiveness
CsGRX43	ABRE	1702	1722	cis-acting element involved in the abscisic acid responsiveness
CsGRX44	ABRE	1708	1728	cis-acting element involved in the abscisic acid responsiveness
CsGRX44	ABRE	1709	1729	cis-acting element involved in the abscisic acid responsiveness
CsGRX45	ABRE	1080	1100	cis-acting element involved in the abscisic acid responsiveness
CsGRX45	ABRE	1081	1101	cis-acting element involved in the abscisic acid responsiveness
CsGRX45	ABRE	1693	1713	cis-acting element involved in the abscisic acid responsiveness
CsGRX45	ABRE	1695	1715	cis-acting element involved in the abscisic acid responsiveness
CsGRX45	ABRE	1696	1716	cis-acting element involved in the abscisic acid responsiveness
CsGRX46	ABRE	503	523	cis-acting element involved in the abscisic acid responsiveness
CsGRX46	ABRE	504	524	cis-acting element involved in the abscisic acid responsiveness
CsGRX46	ABRE	1116	1136	cis-acting element involved in the abscisic acid responsiveness
CsGRX46	ABRE	1118	1138	cis-acting element involved in the abscisic acid responsiveness
CsGRX46	ABRE	1119	1139	cis-acting element involved in the abscisic acid responsiveness
CsGRX47	ABRE	701	721	cis-acting element involved in the abscisic acid responsiveness
CsGRX47	ABRE	783	803	cis-acting element involved in the abscisic acid responsiveness
CsGRX47	ABRE	858	878	cis-acting element involved in the abscisic acid responsiveness
CsGRX54	ABRE	334	354	cis-acting element involved in the abscisic acid responsiveness
CsGRX54	ABRE	335	355	cis-acting element involved in the abscisic acid responsiveness
CsGRX54	ABRE	449	469	cis-acting element involved in the abscisic acid responsiveness
CsGRX54	ABRE	450	470	cis-acting element involved in the abscisic acid responsiveness
CsGRX54	ABRE	454	474	cis-acting element involved in the abscisic acid responsiveness
CsGRX54	ABRE	1494	1514	cis-acting element involved in the abscisic acid responsiveness
CsGRX56	ABRE	1705	1725	cis-acting element involved in the abscisic acid responsiveness
CsGRX56	ABRE	1706	1726	cis-acting element involved in the abscisic acid responsiveness
CsGRX9	ABRE	1718	1738	cis-acting element involved in the abscisic acid responsiveness
CsGRX1	ABRE	265	285	cis-acting element involved in the abscisic acid responsiveness
CsGRX1	ABRE	431	451	cis-acting element involved in the abscisic acid responsiveness
CsGRX1	ABRE	433	453	cis-acting element involved in the abscisic acid responsiveness
CsGRX1	ABRE	434	454	cis-acting element involved in the abscisic acid responsiveness
CsGRX1	ABRE	571	591	cis-acting element involved in the abscisic acid responsiveness
CsGRX1	ABRE	841	861	cis-acting element involved in the abscisic acid responsiveness
CsGRX1	ABRE	1098	1118	cis-acting element involved in the abscisic acid responsiveness
CsGRX1	ABRE	1099	1119	cis-acting element involved in the abscisic acid responsiveness
CsGRX1	ABRE	1195	1215	cis-acting element involved in the abscisic acid responsiveness
CsGRX1	ABRE	1196	1216	cis-acting element involved in the abscisic acid responsiveness
CsGRX29	ABRE	492	512	cis-acting element involved in the abscisic acid responsiveness
CsGRX29	ABRE	766	786	cis-acting element involved in the abscisic acid responsiveness
CsGRX29	ABRE	947	967	cis-acting element involved in the abscisic acid responsiveness
CsGRX29	ABRE	1588	1608	cis-acting element involved in the abscisic acid responsiveness
CsGRX29	ABRE	1636	1656	cis-acting element involved in the abscisic acid responsiveness
CsGRX29	ABRE	1743	1763	cis-acting element involved in the abscisic acid responsiveness
CsGRX48	ABRE	1531	1551	cis-acting element involved in the abscisic acid responsiveness
CsGRX5	ABRE	559	579	cis-acting element involved in the abscisic acid responsiveness
CsGRX5	ABRE	1184	1204	cis-acting element involved in the abscisic acid responsiveness
CsGRX5	ABRE	1866	1886	cis-acting element involved in the abscisic acid responsiveness
CsGRX55	ABRE	1824	1844	cis-acting element involved in the abscisic acid responsiveness
CsGRX6	ABRE	578	598	cis-acting element involved in the abscisic acid responsiveness
CsGRX7	ABRE	636	656	cis-acting element involved in the abscisic acid responsiveness
CsGRX8	ABRE	594	614	cis-acting element involved in the abscisic acid responsiveness
CsGRX10	ABRE	21	41	cis-acting element involved in the abscisic acid responsiveness
CsGRX10	ABRE	59	79	cis-acting element involved in the abscisic acid responsiveness
CsGRX10	ABRE	73	93	cis-acting element involved in the abscisic acid responsiveness
CsGRX10	ABRE	1614	1634	cis-acting element involved in the abscisic acid responsiveness
CsGRX10	ABRE	1628	1648	cis-acting element involved in the abscisic acid responsiveness
CsGRX10	ABRE	1665	1685	cis-acting element involved in the abscisic acid responsiveness
CsGRX11	ABRE	769	789	cis-acting element involved in the abscisic acid responsiveness
CsGRX11	ABRE	770	790	cis-acting element involved in the abscisic acid responsiveness
CsGRX11	ABRE	1863	1883	cis-acting element involved in the abscisic acid responsiveness
CsGRX19	ABRE	730	750	cis-acting element involved in the abscisic acid responsiveness
CsGRX19	ABRE	732	752	cis-acting element involved in the abscisic acid responsiveness
CsGRX19	ABRE	733	753	cis-acting element involved in the abscisic acid responsiveness
CsGRX22	ABRE	1845	1865	cis-acting element involved in the abscisic acid responsiveness
CsGRX26	ABRE	180	200	cis-acting element involved in the abscisic acid responsiveness
CsGRX26	ABRE	278	298	cis-acting element involved in the abscisic acid responsiveness
CsGRX27	ABRE	162	182	cis-acting element involved in the abscisic acid responsiveness
CsGRX30	ABRE	403	423	cis-acting element involved in the abscisic acid responsiveness
CsGRX53	ABRE	780	800	cis-acting element involved in the abscisic acid responsiveness
CsGRX53	ABRE	782	802	cis-acting element involved in the abscisic acid responsiveness
CsGRX53	ABRE	783	803	cis-acting element involved in the abscisic acid responsiveness
CsGRX57	ABRE	1849	1869	cis-acting element involved in the abscisic acid responsiveness
CsGRX58	ABRE	1677	1697	cis-acting element involved in the abscisic acid responsiveness
CsGRX59	ABRE	1168	1188	cis-acting element involved in the abscisic acid responsiveness
CsGRL1	TCA-element	320	340	cis-acting element involved in salicylic acid responsiveness
CsGRL15	TCA-element	118	138	cis-acting element involved in salicylic acid responsiveness
CsGRL2	TCA-element	1321	1341	cis-acting element involved in salicylic acid responsiveness
CsGRL22	TCA-element	1969	1989	cis-acting element involved in salicylic acid responsiveness
CsGRL24	TCA-element	1969	1989	cis-acting element involved in salicylic acid responsiveness
CsGRL25	TCA-element	1327	1347	cis-acting element involved in salicylic acid responsiveness
CsGRL26	TCA-element	1306	1326	cis-acting element involved in salicylic acid responsiveness
CsGRL4	TCA-element	403	423	cis-acting element involved in salicylic acid responsiveness
CsGRL5	TCA-element	946	966	cis-acting element involved in salicylic acid responsiveness
CsGRL5	TCA-element	1232	1252	cis-acting element involved in salicylic acid responsiveness
CsGRL7	TCA-element	719	739	cis-acting element involved in salicylic acid responsiveness
CsGRL7	TCA-element	1305	1325	cis-acting element involved in salicylic acid responsiveness
CsGRX12	TCA-element	1932	1952	cis-acting element involved in salicylic acid responsiveness
CsGRX13	TCA-element	673	693	cis-acting element involved in salicylic acid responsiveness
CsGRX14	TCA-element	1932	1952	cis-acting element involved in salicylic acid responsiveness
CsGRX15	TCA-element	673	693	cis-acting element involved in salicylic acid responsiveness
CsGRX20	TCA-element	395	415	cis-acting element involved in salicylic acid responsiveness
CsGRX24	TCA-element	289	309	cis-acting element involved in salicylic acid responsiveness
CsGRX24	TCA-element	550	570	cis-acting element involved in salicylic acid responsiveness
CsGRX24	TCA-element	1165	1185	cis-acting element involved in salicylic acid responsiveness
CsGRX31	TCA-element	93	113	cis-acting element involved in salicylic acid responsiveness
CsGRX33	TCA-element	1837	1857	cis-acting element involved in salicylic acid responsiveness
CsGRX34	TCA-element	181	201	cis-acting element involved in salicylic acid responsiveness
CsGRX35	TCA-element	583	603	cis-acting element involved in salicylic acid responsiveness
CsGRX36	TCA-element	1765	1785	cis-acting element involved in salicylic acid responsiveness
CsGRX37	TCA-element	121	141	cis-acting element involved in salicylic acid responsiveness
CsGRX37	TCA-element	186	206	cis-acting element involved in salicylic acid responsiveness
CsGRX38	TCA-element	586	606	cis-acting element involved in salicylic acid responsiveness
CsGRX39	TCA-element	1190	1210	cis-acting element involved in salicylic acid responsiveness
CsGRX41	TCA-element	1207	1227	cis-acting element involved in salicylic acid responsiveness
CsGRX43	TCA-element	1046	1066	cis-acting element involved in salicylic acid responsiveness
CsGRX44	TCA-element	1774	1794	cis-acting element involved in salicylic acid responsiveness
CsGRX44	SARE	1937	1957	cis-acting element involved in salicylic acid responsiveness
CsGRX45	TCA-element	1146	1166	cis-acting element involved in salicylic acid responsiveness
CsGRX45	SARE	1309	1329	cis-acting element involved in salicylic acid responsiveness
CsGRX45	SARE	1937	1957	cis-acting element involved in salicylic acid responsiveness
CsGRX46	TCA-element	569	589	cis-acting element involved in salicylic acid responsiveness
CsGRX46	SARE	732	752	cis-acting element involved in salicylic acid responsiveness
CsGRX46	SARE	1360	1380	cis-acting element involved in salicylic acid responsiveness
CsGRX46	SARE	1972	1992	cis-acting element involved in salicylic acid responsiveness
CsGRX50	TCA-element	1172	1192	cis-acting element involved in salicylic acid responsiveness
CsGRX51	TCA-element	857	877	cis-acting element involved in salicylic acid responsiveness
CsGRX52	TCA-element	858	878	cis-acting element involved in salicylic acid responsiveness
CsGRX56	TCA-element	1848	1868	cis-acting element involved in salicylic acid responsiveness
CsGRX9	TCA-element	1207	1227	cis-acting element involved in salicylic acid responsiveness
CsGRX1	TCA-element	551	571	cis-acting element involved in salicylic acid responsiveness
CsGRX1	TCA-element	1440	1460	cis-acting element involved in salicylic acid responsiveness
CsGRX55	TCA-element	769	789	cis-acting element involved in salicylic acid responsiveness
CsGRX55	TCA-element	931	951	cis-acting element involved in salicylic acid responsiveness
CsGRX6	TCA-element	1332	1352	cis-acting element involved in salicylic acid responsiveness
CsGRX7	TCA-element	1022	1042	cis-acting element involved in salicylic acid responsiveness
CsGRX10	TCA-element	188	208	cis-acting element involved in salicylic acid responsiveness
CsGRX10	TCA-element	1508	1528	cis-acting element involved in salicylic acid responsiveness
CsGRX2	TCA-element	274	294	cis-acting element involved in salicylic acid responsiveness
CsGRX22	SARE	539	559	cis-acting element involved in salicylic acid responsiveness
CsGRX26	TCA-element	1338	1358	cis-acting element involved in salicylic acid responsiveness
CsGRX27	TCA-element	109	129	cis-acting element involved in salicylic acid responsiveness
CsGRX3	TCA-element	274	294	cis-acting element involved in salicylic acid responsiveness
CsGRX58	TCA-element	1214	1234	cis-acting element involved in salicylic acid responsiveness
CsGRX58	TCA-element	1296	1316	cis-acting element involved in salicylic acid responsiveness
CsGRL1	ERE	1490	1510	the response element on estrogenes
CsGRL1	ERE	1492	1512	the response element on estrogenes
CsGRL11	ERE	835	855	the response element on estrogenes
CsGRL11	ERE	1505	1525	the response element on estrogenes
CsGRL11	ERE	1839	1859	the response element on estrogenes
CsGRL12	ERE	1017	1037	the response element on estrogenes
CsGRL12	ERE	1696	1716	the response element on estrogenes
CsGRL13	ERE	1087	1107	the response element on estrogenes
CsGRL13	ERE	1089	1109	the response element on estrogenes
CsGRL13	ERE	1340	1360	the response element on estrogenes
CsGRL13	ERE	1640	1660	the response element on estrogenes
CsGRL13	ERE	1647	1667	the response element on estrogenes
CsGRL13	ERE	1655	1675	the response element on estrogenes
CsGRL14	ERE	623	643	the response element on estrogenes
CsGRL14	ERE	861	881	the response element on estrogenes
CsGRL15	ERE	621	641	the response element on estrogenes
CsGRL15	ERE	859	879	the response element on estrogenes
CsGRL16	ERE	729	749	the response element on estrogenes
CsGRL16	ERE	859	879	the response element on estrogenes
CsGRL16	ERE	1620	1640	the response element on estrogenes
CsGRL17	ERE	742	762	the response element on estrogenes
CsGRL17	ERE	864	884	the response element on estrogenes
CsGRL17	ERE	1624	1644	the response element on estrogenes
CsGRL19	ERE	162	182	the response element on estrogenes
CsGRL2	ERE	1048	1068	the response element on estrogenes
CsGRL20	ERE	597	617	the response element on estrogenes
CsGRL20	ERE	844	864	the response element on estrogenes
CsGRL20	ERE	1364	1384	the response element on estrogenes
CsGRL21	ERE	1312	1332	the response element on estrogenes
CsGRL21	ERE	1314	1334	the response element on estrogenes
CsGRL21	ERE	1359	1379	the response element on estrogenes
CsGRL22	ERE	200	220	the response element on estrogenes
CsGRL22	ERE	280	300	the response element on estrogenes
CsGRL23	ERE	997	1017	the response element on estrogenes
CsGRL24	ERE	275	295	the response element on estrogenes
CsGRL25	ERE	826	846	the response element on estrogenes
CsGRL25	ERE	1054	1074	the response element on estrogenes
CsGRL26	ERE	1076	1096	the response element on estrogenes
CsGRL27	ERE	1096	1116	the response element on estrogenes
CsGRL27	ERE	1098	1118	the response element on estrogenes
CsGRL27	ERE	1348	1368	the response element on estrogenes
CsGRL27	ERE	1649	1669	the response element on estrogenes
CsGRL27	ERE	1656	1676	the response element on estrogenes
CsGRL3	ERE	52	72	the response element on estrogenes
CsGRL3	ERE	142	162	the response element on estrogenes
CsGRL3	ERE	176	196	the response element on estrogenes
CsGRL3	ERE	1835	1855	the response element on estrogenes
CsGRL4	ERE	461	481	the response element on estrogenes
CsGRL5	ERE	342	362	the response element on estrogenes
CsGRL6	ERE	1289	1309	the response element on estrogenes
CsGRL7	ERE	1683	1703	the response element on estrogenes
CsGRL9	ERE	1253	1273	the response element on estrogenes
CsGRX13	ERE	10	30	the response element on estrogenes
CsGRX13	ERE	12	32	the response element on estrogenes
CsGRX13	ERE	1526	1546	the response element on estrogenes
CsGRX15	ERE	4	24	the response element on estrogenes
CsGRX15	ERE	6	26	the response element on estrogenes
CsGRX15	ERE	1527	1547	the response element on estrogenes
CsGRX16	ERE	416	436	the response element on estrogenes
CsGRX16	ERE	418	438	the response element on estrogenes
CsGRX16	ERE	717	737	the response element on estrogenes
CsGRX16	ERE	800	820	the response element on estrogenes
CsGRX16	ERE	1920	1940	the response element on estrogenes
CsGRX17	ERE	7	27	the response element on estrogenes
CsGRX17	ERE	100	120	the response element on estrogenes
CsGRX17	ERE	209	229	the response element on estrogenes
CsGRX17	ERE	421	441	the response element on estrogenes
CsGRX17	ERE	1414	1434	the response element on estrogenes
CsGRX17	ERE	1529	1549	the response element on estrogenes
CsGRX17	ERE	1979	1999	the response element on estrogenes
CsGRX18	ERE	50	70	the response element on estrogenes
CsGRX18	ERE	81	101	the response element on estrogenes
CsGRX18	ERE	110	130	the response element on estrogenes
CsGRX18	ERE	141	161	the response element on estrogenes
CsGRX18	ERE	203	223	the response element on estrogenes
CsGRX18	ERE	312	332	the response element on estrogenes
CsGRX18	ERE	631	651	the response element on estrogenes
CsGRX18	ERE	708	728	the response element on estrogenes
CsGRX18	ERE	1491	1511	the response element on estrogenes
CsGRX18	ERE	1606	1626	the response element on estrogenes
CsGRX21	ERE	244	264	the response element on estrogenes
CsGRX21	ERE	508	528	the response element on estrogenes
CsGRX21	ERE	536	556	the response element on estrogenes
CsGRX23	ERE	170	190	the response element on estrogenes
CsGRX23	ERE	298	318	the response element on estrogenes
CsGRX23	ERE	562	582	the response element on estrogenes
CsGRX23	ERE	894	914	the response element on estrogenes
CsGRX24	ERE	543	563	the response element on estrogenes
CsGRX25	ERE	433	453	the response element on estrogenes
CsGRX25	ERE	1236	1256	the response element on estrogenes
CsGRX25	ERE	1840	1860	the response element on estrogenes
CsGRX25	ERE	1927	1947	the response element on estrogenes
CsGRX33	ERE	1177	1197	the response element on estrogenes
CsGRX33	ERE	1512	1532	the response element on estrogenes
CsGRX34	ERE	425	445	the response element on estrogenes
CsGRX36	ERE	816	836	the response element on estrogenes
CsGRX36	ERE	1021	1041	the response element on estrogenes
CsGRX37	ERE	441	461	the response element on estrogenes
CsGRX40	ERE	21	41	the response element on estrogenes
CsGRX40	ERE	155	175	the response element on estrogenes
CsGRX40	ERE	487	507	the response element on estrogenes
CsGRX40	ERE	1592	1612	the response element on estrogenes
CsGRX42	ERE	924	944	the response element on estrogenes
CsGRX42	ERE	926	946	the response element on estrogenes
CsGRX42	ERE	1080	1100	the response element on estrogenes
CsGRX43	ERE	1448	1468	the response element on estrogenes
CsGRX43	ERE	1450	1470	the response element on estrogenes
CsGRX47	ERE	756	776	the response element on estrogenes
CsGRX49	ERE	444	464	the response element on estrogenes
CsGRX49	ERE	1245	1265	the response element on estrogenes
CsGRX49	ERE	1836	1856	the response element on estrogenes
CsGRX49	ERE	1927	1947	the response element on estrogenes
CsGRX54	ERE	1560	1580	the response element on estrogenes
CsGRX56	ERE	845	865	the response element on estrogenes
CsGRX56	ERE	1182	1202	the response element on estrogenes
CsGRX1	ERE	1669	1689	the response element on estrogenes
CsGRX29	ERE	1166	1186	the response element on estrogenes
CsGRX29	ERE	1375	1395	the response element on estrogenes
CsGRX29	ERE	1772	1792	the response element on estrogenes
CsGRX48	ERE	352	372	the response element on estrogenes
CsGRX48	ERE	358	378	the response element on estrogenes
CsGRX48	ERE	471	491	the response element on estrogenes
CsGRX48	ERE	1261	1281	the response element on estrogenes
CsGRX48	ERE	1471	1491	the response element on estrogenes
CsGRX48	ERE	1574	1594	the response element on estrogenes
CsGRX5	ERE	193	213	the response element on estrogenes
CsGRX5	ERE	1426	1446	the response element on estrogenes
CsGRX5	ERE	1531	1551	the response element on estrogenes
CsGRX5	ERE	1683	1703	the response element on estrogenes
CsGRX6	ERE	198	218	the response element on estrogenes
CsGRX6	ERE	1387	1407	the response element on estrogenes
CsGRX6	ERE	1565	1585	the response element on estrogenes
CsGRX6	ERE	1612	1632	the response element on estrogenes
CsGRX8	ERE	1501	1521	the response element on estrogenes
CsGRX8	ERE	1587	1607	the response element on estrogenes
CsGRX8	ERE	1623	1643	the response element on estrogenes
CsGRX8	ERE	1651	1671	the response element on estrogenes
CsGRX10	ERE	659	679	the response element on estrogenes
CsGRX10	ERE	1046	1066	the response element on estrogenes
CsGRX10	ERE	1441	1461	the response element on estrogenes
CsGRX11	ERE	1102	1122	the response element on estrogenes
CsGRX19	ERE	298	318	the response element on estrogenes
CsGRX19	ERE	343	363	the response element on estrogenes
CsGRX19	ERE	620	640	the response element on estrogenes
CsGRX19	ERE	1228	1248	the response element on estrogenes
CsGRX19	ERE	1338	1358	the response element on estrogenes
CsGRX19	ERE	1396	1416	the response element on estrogenes
CsGRX19	ERE	1541	1561	the response element on estrogenes
CsGRX19	ERE	1618	1638	the response element on estrogenes
CsGRX19	ERE	1781	1801	the response element on estrogenes
CsGRX22	ERE	557	577	the response element on estrogenes
CsGRX22	ERE	1008	1028	the response element on estrogenes
CsGRX26	ERE	481	501	the response element on estrogenes
CsGRX26	ERE	1501	1521	the response element on estrogenes
CsGRX26	ERE	1589	1609	the response element on estrogenes
CsGRX26	ERE	1607	1627	the response element on estrogenes
CsGRX27	ERE	666	686	the response element on estrogenes
CsGRX27	ERE	746	766	the response element on estrogenes
CsGRX28	ERE	96	116	the response element on estrogenes
CsGRX30	ERE	1789	1809	the response element on estrogenes
CsGRX53	ERE	350	370	the response element on estrogenes
CsGRX53	ERE	395	415	the response element on estrogenes
CsGRX53	ERE	671	691	the response element on estrogenes
CsGRX53	ERE	1274	1294	the response element on estrogenes
CsGRX53	ERE	1379	1399	the response element on estrogenes
CsGRX53	ERE	1437	1457	the response element on estrogenes
CsGRX53	ERE	1581	1601	the response element on estrogenes
CsGRX53	ERE	1658	1678	the response element on estrogenes
CsGRX57	ERE	638	658	the response element on estrogenes
CsGRX57	ERE	1338	1358	the response element on estrogenes
CsGRL1	CAT-box	898	918	cis-acting regulatory element related to meristem expression
CsGRL13	CAT-box	283	303	cis-acting regulatory element related to meristem expression
CsGRL14	CAT-box	1966	1986	cis-acting regulatory element related to meristem expression
CsGRL15	CAT-box	1966	1986	cis-acting regulatory element related to meristem expression
CsGRL16	CAT-box	204	224	cis-acting regulatory element related to meristem expression
CsGRL17	CAT-box	218	238	cis-acting regulatory element related to meristem expression
CsGRL17	CAT-box	1225	1245	cis-acting regulatory element related to meristem expression
CsGRL18	CAT-box	1858	1878	cis-acting regulatory element related to meristem expression
CsGRL19	CAT-box	1856	1876	cis-acting regulatory element related to meristem expression
CsGRL2	CAT-box	1954	1974	cis-acting regulatory element related to meristem expression
CsGRL20	CAT-box	697	717	cis-acting regulatory element related to meristem expression
CsGRL21	CAT-box	113	133	cis-acting regulatory element related to meristem expression
CsGRL25	CAT-box	1954	1974	cis-acting regulatory element related to meristem expression
CsGRL26	CAT-box	1008	1028	cis-acting regulatory element related to meristem expression
CsGRL27	CAT-box	292	312	cis-acting regulatory element related to meristem expression
CsGRL4	CAT-box	1802	1822	cis-acting regulatory element related to meristem expression
CsGRL7	CAT-box	1857	1877	cis-acting regulatory element related to meristem expression
CsGRX13	CAT-box	791	811	cis-acting regulatory element related to meristem expression
CsGRX15	CAT-box	791	811	cis-acting regulatory element related to meristem expression
CsGRX31	CAT-box	877	897	cis-acting regulatory element related to meristem expression
CsGRX31	CAT-box	1050	1070	cis-acting regulatory element related to meristem expression
CsGRX32	CAT-box	234	254	cis-acting regulatory element related to meristem expression
CsGRX34	CAT-box	1145	1165	cis-acting regulatory element related to meristem expression
CsGRX37	CAT-box	1159	1179	cis-acting regulatory element related to meristem expression
CsGRX39	CAT-box	234	254	cis-acting regulatory element related to meristem expression
CsGRX40	CAT-box	1482	1502	cis-acting regulatory element related to meristem expression
CsGRX41	CAT-box	1059	1079	cis-acting regulatory element related to meristem expression
CsGRX46	CAT-box	1448	1468	cis-acting regulatory element related to meristem expression
CsGRX47	CAT-box	1543	1563	cis-acting regulatory element related to meristem expression
CsGRX51	CAT-box	940	960	cis-acting regulatory element related to meristem expression
CsGRX52	CAT-box	941	961	cis-acting regulatory element related to meristem expression
CsGRX9	CAT-box	1059	1079	cis-acting regulatory element related to meristem expression
CsGRX55	CAT-box	699	719	cis-acting regulatory element related to meristem expression
CsGRX8	CAT-box	1312	1332	cis-acting regulatory element related to meristem expression
CsGRX11	CAT-box	1174	1194	cis-acting regulatory element related to meristem expression
CsGRX26	CAT-box	840	860	cis-acting regulatory element related to meristem expression
CsGRL1	ARE	1905	1925	cis-acting regulatory element essential for the anaerobic induction
CsGRL10	ARE	519	539	cis-acting regulatory element essential for the anaerobic induction
CsGRL10	ARE	574	594	cis-acting regulatory element essential for the anaerobic induction
CsGRL10	ARE	647	667	cis-acting regulatory element essential for the anaerobic induction
CsGRL10	ARE	656	676	cis-acting regulatory element essential for the anaerobic induction
CsGRL10	ARE	1245	1265	cis-acting regulatory element essential for the anaerobic induction
CsGRL10	ARE	1848	1868	cis-acting regulatory element essential for the anaerobic induction
CsGRL11	ARE	295	315	cis-acting regulatory element essential for the anaerobic induction
CsGRL11	ARE	1020	1040	cis-acting regulatory element essential for the anaerobic induction
CsGRL11	ARE	1926	1946	cis-acting regulatory element essential for the anaerobic induction
CsGRL12	ARE	488	508	cis-acting regulatory element essential for the anaerobic induction
CsGRL12	ARE	1202	1222	cis-acting regulatory element essential for the anaerobic induction
CsGRL12	ARE	1926	1946	cis-acting regulatory element essential for the anaerobic induction
CsGRL14	ARE	1	11	cis-acting regulatory element essential for the anaerobic induction
CsGRL14	ARE	158	178	cis-acting regulatory element essential for the anaerobic induction
CsGRL14	ARE	1615	1635	cis-acting regulatory element essential for the anaerobic induction
CsGRL14	ARE	1717	1737	cis-acting regulatory element essential for the anaerobic induction
CsGRL15	ARE	157	177	cis-acting regulatory element essential for the anaerobic induction
CsGRL15	ARE	1613	1633	cis-acting regulatory element essential for the anaerobic induction
CsGRL15	ARE	1715	1735	cis-acting regulatory element essential for the anaerobic induction
CsGRL16	ARE	885	905	cis-acting regulatory element essential for the anaerobic induction
CsGRL17	ARE	890	910	cis-acting regulatory element essential for the anaerobic induction
CsGRL19	ARE	759	779	cis-acting regulatory element essential for the anaerobic induction
CsGRL19	ARE	803	823	cis-acting regulatory element essential for the anaerobic induction
CsGRL2	ARE	372	392	cis-acting regulatory element essential for the anaerobic induction
CsGRL2	ARE	384	404	cis-acting regulatory element essential for the anaerobic induction
CsGRL2	ARE	389	409	cis-acting regulatory element essential for the anaerobic induction
CsGRL2	ARE	1181	1201	cis-acting regulatory element essential for the anaerobic induction
CsGRL20	ARE	810	830	cis-acting regulatory element essential for the anaerobic induction
CsGRL21	ARE	1720	1740	cis-acting regulatory element essential for the anaerobic induction
CsGRL22	ARE	635	655	cis-acting regulatory element essential for the anaerobic induction
CsGRL23	ARE	441	461	cis-acting regulatory element essential for the anaerobic induction
CsGRL23	ARE	478	498	cis-acting regulatory element essential for the anaerobic induction
CsGRL23	ARE	511	531	cis-acting regulatory element essential for the anaerobic induction
CsGRL23	ARE	541	561	cis-acting regulatory element essential for the anaerobic induction
CsGRL23	ARE	973	993	cis-acting regulatory element essential for the anaerobic induction
CsGRL23	ARE	1769	1789	cis-acting regulatory element essential for the anaerobic induction
CsGRL25	ARE	386	406	cis-acting regulatory element essential for the anaerobic induction
CsGRL25	ARE	398	418	cis-acting regulatory element essential for the anaerobic induction
CsGRL25	ARE	403	423	cis-acting regulatory element essential for the anaerobic induction
CsGRL25	ARE	1187	1207	cis-acting regulatory element essential for the anaerobic induction
CsGRL26	ARE	417	437	cis-acting regulatory element essential for the anaerobic induction
CsGRL26	ARE	447	467	cis-acting regulatory element essential for the anaerobic induction
CsGRL26	ARE	679	699	cis-acting regulatory element essential for the anaerobic induction
CsGRL26	ARE	775	795	cis-acting regulatory element essential for the anaerobic induction
CsGRL26	ARE	1699	1719	cis-acting regulatory element essential for the anaerobic induction
CsGRL3	ARE	206	226	cis-acting regulatory element essential for the anaerobic induction
CsGRL5	ARE	161	181	cis-acting regulatory element essential for the anaerobic induction
CsGRL6	ARE	1694	1714	cis-acting regulatory element essential for the anaerobic induction
CsGRL7	ARE	116	136	cis-acting regulatory element essential for the anaerobic induction
CsGRL7	ARE	121	141	cis-acting regulatory element essential for the anaerobic induction
CsGRL7	ARE	1187	1207	cis-acting regulatory element essential for the anaerobic induction
CsGRL7	ARE	1674	1694	cis-acting regulatory element essential for the anaerobic induction
CsGRL8	ARE	1	18	cis-acting regulatory element essential for the anaerobic induction
CsGRL8	ARE	972	992	cis-acting regulatory element essential for the anaerobic induction
CsGRL8	ARE	1609	1629	cis-acting regulatory element essential for the anaerobic induction
CsGRL9	ARE	317	337	cis-acting regulatory element essential for the anaerobic induction
CsGRL9	ARE	876	896	cis-acting regulatory element essential for the anaerobic induction
CsGRL9	ARE	1150	1170	cis-acting regulatory element essential for the anaerobic induction
CsGRL9	ARE	1422	1442	cis-acting regulatory element essential for the anaerobic induction
CsGRL9	ARE	1614	1634	cis-acting regulatory element essential for the anaerobic induction
CsGRX12	ARE	1152	1172	cis-acting regulatory element essential for the anaerobic induction
CsGRX13	ARE	1076	1096	cis-acting regulatory element essential for the anaerobic induction
CsGRX13	ARE	1895	1915	cis-acting regulatory element essential for the anaerobic induction
CsGRX14	ARE	612	632	cis-acting regulatory element essential for the anaerobic induction
CsGRX14	ARE	1152	1172	cis-acting regulatory element essential for the anaerobic induction
CsGRX15	ARE	1076	1096	cis-acting regulatory element essential for the anaerobic induction
CsGRX15	ARE	1895	1915	cis-acting regulatory element essential for the anaerobic induction
CsGRX16	ARE	634	654	cis-acting regulatory element essential for the anaerobic induction
CsGRX16	ARE	1065	1085	cis-acting regulatory element essential for the anaerobic induction
CsGRX20	ARE	190	210	cis-acting regulatory element essential for the anaerobic induction
CsGRX20	ARE	254	274	cis-acting regulatory element essential for the anaerobic induction
CsGRX20	ARE	1010	1030	cis-acting regulatory element essential for the anaerobic induction
CsGRX20	ARE	1229	1249	cis-acting regulatory element essential for the anaerobic induction
CsGRX20	ARE	1263	1283	cis-acting regulatory element essential for the anaerobic induction
CsGRX20	ARE	1876	1896	cis-acting regulatory element essential for the anaerobic induction
CsGRX21	ARE	113	133	cis-acting regulatory element essential for the anaerobic induction
CsGRX21	ARE	915	935	cis-acting regulatory element essential for the anaerobic induction
CsGRX21	ARE	985	1005	cis-acting regulatory element essential for the anaerobic induction
CsGRX21	ARE	1215	1235	cis-acting regulatory element essential for the anaerobic induction
CsGRX21	ARE	1238	1258	cis-acting regulatory element essential for the anaerobic induction
CsGRX21	ARE	1580	1600	cis-acting regulatory element essential for the anaerobic induction
CsGRX21	ARE	1847	1867	cis-acting regulatory element essential for the anaerobic induction
CsGRX23	ARE	430	450	cis-acting regulatory element essential for the anaerobic induction
CsGRX24	ARE	16	36	cis-acting regulatory element essential for the anaerobic induction
CsGRX25	ARE	321	341	cis-acting regulatory element essential for the anaerobic induction
CsGRX25	ARE	1142	1162	cis-acting regulatory element essential for the anaerobic induction
CsGRX31	ARE	203	223	cis-acting regulatory element essential for the anaerobic induction
CsGRX31	ARE	1356	1376	cis-acting regulatory element essential for the anaerobic induction
CsGRX31	ARE	1684	1704	cis-acting regulatory element essential for the anaerobic induction
CsGRX33	ARE	1484	1504	cis-acting regulatory element essential for the anaerobic induction
CsGRX33	ARE	1534	1554	cis-acting regulatory element essential for the anaerobic induction
CsGRX34	ARE	562	582	cis-acting regulatory element essential for the anaerobic induction
CsGRX34	ARE	567	587	cis-acting regulatory element essential for the anaerobic induction
CsGRX34	ARE	1093	1113	cis-acting regulatory element essential for the anaerobic induction
CsGRX34	ARE	1128	1148	cis-acting regulatory element essential for the anaerobic induction
CsGRX34	ARE	1914	1934	cis-acting regulatory element essential for the anaerobic induction
CsGRX35	ARE	1811	1831	cis-acting regulatory element essential for the anaerobic induction
CsGRX37	ARE	576	596	cis-acting regulatory element essential for the anaerobic induction
CsGRX37	ARE	581	601	cis-acting regulatory element essential for the anaerobic induction
CsGRX37	ARE	1107	1127	cis-acting regulatory element essential for the anaerobic induction
CsGRX37	ARE	1142	1162	cis-acting regulatory element essential for the anaerobic induction
CsGRX37	ARE	1914	1934	cis-acting regulatory element essential for the anaerobic induction
CsGRX38	ARE	1812	1832	cis-acting regulatory element essential for the anaerobic induction
CsGRX39	ARE	16	36	cis-acting regulatory element essential for the anaerobic induction
CsGRX40	ARE	142	162	cis-acting regulatory element essential for the anaerobic induction
CsGRX40	ARE	161	181	cis-acting regulatory element essential for the anaerobic induction
CsGRX41	ARE	158	178	cis-acting regulatory element essential for the anaerobic induction
CsGRX41	ARE	210	230	cis-acting regulatory element essential for the anaerobic induction
CsGRX41	ARE	253	273	cis-acting regulatory element essential for the anaerobic induction
CsGRX41	ARE	371	391	cis-acting regulatory element essential for the anaerobic induction
CsGRX41	ARE	518	538	cis-acting regulatory element essential for the anaerobic induction
CsGRX41	ARE	676	696	cis-acting regulatory element essential for the anaerobic induction
CsGRX41	ARE	1159	1179	cis-acting regulatory element essential for the anaerobic induction
CsGRX41	ARE	1604	1624	cis-acting regulatory element essential for the anaerobic induction
CsGRX42	ARE	127	147	cis-acting regulatory element essential for the anaerobic induction
CsGRX43	ARE	321	341	cis-acting regulatory element essential for the anaerobic induction
CsGRX43	ARE	886	906	cis-acting regulatory element essential for the anaerobic induction
CsGRX43	ARE	1072	1092	cis-acting regulatory element essential for the anaerobic induction
CsGRX43	ARE	1261	1281	cis-acting regulatory element essential for the anaerobic induction
CsGRX43	ARE	1684	1704	cis-acting regulatory element essential for the anaerobic induction
CsGRX44	ARE	1647	1667	cis-acting regulatory element essential for the anaerobic induction
CsGRX45	ARE	1019	1039	cis-acting regulatory element essential for the anaerobic induction
CsGRX46	ARE	442	462	cis-acting regulatory element essential for the anaerobic induction
CsGRX47	ARE	185	205	cis-acting regulatory element essential for the anaerobic induction
CsGRX49	ARE	332	352	cis-acting regulatory element essential for the anaerobic induction
CsGRX49	ARE	1151	1171	cis-acting regulatory element essential for the anaerobic induction
CsGRX50	ARE	516	536	cis-acting regulatory element essential for the anaerobic induction
CsGRX50	ARE	1238	1258	cis-acting regulatory element essential for the anaerobic induction
CsGRX51	ARE	1611	1631	cis-acting regulatory element essential for the anaerobic induction
CsGRX52	ARE	1612	1632	cis-acting regulatory element essential for the anaerobic induction
CsGRX54	ARE	1862	1882	cis-acting regulatory element essential for the anaerobic induction
CsGRX56	ARE	1488	1508	cis-acting regulatory element essential for the anaerobic induction
CsGRX9	ARE	158	178	cis-acting regulatory element essential for the anaerobic induction
CsGRX9	ARE	210	230	cis-acting regulatory element essential for the anaerobic induction
CsGRX9	ARE	253	273	cis-acting regulatory element essential for the anaerobic induction
CsGRX9	ARE	371	391	cis-acting regulatory element essential for the anaerobic induction
CsGRX9	ARE	518	538	cis-acting regulatory element essential for the anaerobic induction
CsGRX9	ARE	676	696	cis-acting regulatory element essential for the anaerobic induction
CsGRX9	ARE	1159	1179	cis-acting regulatory element essential for the anaerobic induction
CsGRX9	ARE	1604	1624	cis-acting regulatory element essential for the anaerobic induction
CsGRX1	ARE	1066	1086	cis-acting regulatory element essential for the anaerobic induction
CsGRX1	ARE	1186	1206	cis-acting regulatory element essential for the anaerobic induction
CsGRX29	ARE	254	274	cis-acting regulatory element essential for the anaerobic induction
CsGRX29	ARE	283	303	cis-acting regulatory element essential for the anaerobic induction
CsGRX29	ARE	327	347	cis-acting regulatory element essential for the anaerobic induction
CsGRX29	ARE	495	515	cis-acting regulatory element essential for the anaerobic induction
CsGRX29	ARE	733	753	cis-acting regulatory element essential for the anaerobic induction
CsGRX29	ARE	762	782	cis-acting regulatory element essential for the anaerobic induction
CsGRX29	ARE	939	959	cis-acting regulatory element essential for the anaerobic induction
CsGRX29	ARE	983	1003	cis-acting regulatory element essential for the anaerobic induction
CsGRX29	ARE	1012	1032	cis-acting regulatory element essential for the anaerobic induction
CsGRX29	ARE	1577	1597	cis-acting regulatory element essential for the anaerobic induction
CsGRX48	ARE	438	458	cis-acting regulatory element essential for the anaerobic induction
CsGRX55	ARE	919	939	cis-acting regulatory element essential for the anaerobic induction
CsGRX55	ARE	1095	1115	cis-acting regulatory element essential for the anaerobic induction
CsGRX7	ARE	162	182	cis-acting regulatory element essential for the anaerobic induction
CsGRX8	ARE	21	41	cis-acting regulatory element essential for the anaerobic induction
CsGRX8	ARE	270	290	cis-acting regulatory element essential for the anaerobic induction
CsGRX10	ARE	698	718	cis-acting regulatory element essential for the anaerobic induction
CsGRX10	ARE	768	788	cis-acting regulatory element essential for the anaerobic induction
CsGRX10	ARE	938	958	cis-acting regulatory element essential for the anaerobic induction
CsGRX10	ARE	1008	1028	cis-acting regulatory element essential for the anaerobic induction
CsGRX10	ARE	1041	1061	cis-acting regulatory element essential for the anaerobic induction
CsGRX10	ARE	1195	1215	cis-acting regulatory element essential for the anaerobic induction
CsGRX10	ARE	1703	1723	cis-acting regulatory element essential for the anaerobic induction
CsGRX10	ARE	1937	1957	cis-acting regulatory element essential for the anaerobic induction
CsGRX10	ARE	1949	1969	cis-acting regulatory element essential for the anaerobic induction
CsGRX11	ARE	13	33	cis-acting regulatory element essential for the anaerobic induction
CsGRX11	ARE	1164	1184	cis-acting regulatory element essential for the anaerobic induction
CsGRX11	ARE	1738	1758	cis-acting regulatory element essential for the anaerobic induction
CsGRX11	ARE	1955	1975	cis-acting regulatory element essential for the anaerobic induction
CsGRX19	ARE	427	447	cis-acting regulatory element essential for the anaerobic induction
CsGRX19	ARE	524	544	cis-acting regulatory element essential for the anaerobic induction
CsGRX19	ARE	1456	1476	cis-acting regulatory element essential for the anaerobic induction
CsGRX2	ARE	755	775	cis-acting regulatory element essential for the anaerobic induction
CsGRX26	ARE	680	700	cis-acting regulatory element essential for the anaerobic induction
CsGRX26	ARE	791	811	cis-acting regulatory element essential for the anaerobic induction
CsGRX26	ARE	1947	1967	cis-acting regulatory element essential for the anaerobic induction
CsGRX26	ARE	1974	1994	cis-acting regulatory element essential for the anaerobic induction
CsGRX27	ARE	452	472	cis-acting regulatory element essential for the anaerobic induction
CsGRX27	ARE	582	602	cis-acting regulatory element essential for the anaerobic induction
CsGRX27	ARE	626	646	cis-acting regulatory element essential for the anaerobic induction
CsGRX27	ARE	1005	1025	cis-acting regulatory element essential for the anaerobic induction
CsGRX27	ARE	1952	1972	cis-acting regulatory element essential for the anaerobic induction
CsGRX27	ARE	1974	1994	cis-acting regulatory element essential for the anaerobic induction
CsGRX28	ARE	553	573	cis-acting regulatory element essential for the anaerobic induction
CsGRX28	ARE	608	628	cis-acting regulatory element essential for the anaerobic induction
CsGRX28	ARE	630	650	cis-acting regulatory element essential for the anaerobic induction
CsGRX28	ARE	841	861	cis-acting regulatory element essential for the anaerobic induction
CsGRX3	ARE	756	776	cis-acting regulatory element essential for the anaerobic induction
CsGRX30	ARE	1053	1073	cis-acting regulatory element essential for the anaerobic induction
CsGRX30	ARE	1479	1499	cis-acting regulatory element essential for the anaerobic induction
CsGRX30	ARE	1567	1587	cis-acting regulatory element essential for the anaerobic induction
CsGRX53	ARE	478	498	cis-acting regulatory element essential for the anaerobic induction
CsGRX53	ARE	575	595	cis-acting regulatory element essential for the anaerobic induction
CsGRX53	ARE	1497	1517	cis-acting regulatory element essential for the anaerobic induction
CsGRX57	ARE	520	540	cis-acting regulatory element essential for the anaerobic induction
CsGRX57	ARE	709	729	cis-acting regulatory element essential for the anaerobic induction
CsGRX58	ARE	788	808	cis-acting regulatory element essential for the anaerobic induction
CsGRX58	ARE	798	818	cis-acting regulatory element essential for the anaerobic induction
CsGRX59	ARE	304	324	cis-acting regulatory element essential for the anaerobic induction
CsGRX59	ARE	672	692	cis-acting regulatory element essential for the anaerobic induction
CsGRL14	GC-motif	1820	1840	enhancer-like element involved in anoxic specific inducibility
CsGRL14	GC-motif	1851	1871	enhancer-like element involved in anoxic specific inducibility
CsGRL15	GC-motif	1818	1838	enhancer-like element involved in anoxic specific inducibility
CsGRL15	GC-motif	1849	1869	enhancer-like element involved in anoxic specific inducibility
CsGRL2	GC-motif	583	603	enhancer-like element involved in anoxic specific inducibility
CsGRL25	GC-motif	590	610	enhancer-like element involved in anoxic specific inducibility
CsGRL3	GC-motif	1097	1117	enhancer-like element involved in anoxic specific inducibility
CsGRL5	GC-motif	1575	1595	enhancer-like element involved in anoxic specific inducibility
CsGRL9	GC-motif	565	585	enhancer-like element involved in anoxic specific inducibility
CsGRX33	GC-motif	1885	1905	enhancer-like element involved in anoxic specific inducibility
CsGRX44	GC-motif	609	629	enhancer-like element involved in anoxic specific inducibility
CsGRX44	GC-motif	616	636	enhancer-like element involved in anoxic specific inducibility
CsGRX56	GC-motif	1896	1916	enhancer-like element involved in anoxic specific inducibility
CsGRX29	GC-motif	1845	1865	enhancer-like element involved in anoxic specific inducibility
CsGRX8	GC-motif	1939	1959	enhancer-like element involved in anoxic specific inducibility
CsGRX2	GC-motif	685	705	enhancer-like element involved in anoxic specific inducibility
CsGRX28	GC-motif	707	727	enhancer-like element involved in anoxic specific inducibility
CsGRX3	GC-motif	686	706	enhancer-like element involved in anoxic specific inducibility
CsGRX41	RY-element	532	552	cis-acting regulatory element involved in seed-specific regulation
CsGRX41	RY-element	536	556	cis-acting regulatory element involved in seed-specific regulation
CsGRX41	RY-element	1372	1392	cis-acting regulatory element involved in seed-specific regulation
CsGRX41	RY-element	1521	1541	cis-acting regulatory element involved in seed-specific regulation
CsGRX9	RY-element	532	552	cis-acting regulatory element involved in seed-specific regulation
CsGRX9	RY-element	536	556	cis-acting regulatory element involved in seed-specific regulation
CsGRX9	RY-element	1372	1392	cis-acting regulatory element involved in seed-specific regulation
CsGRX9	RY-element	1521	1541	cis-acting regulatory element involved in seed-specific regulation
CsGRL1	GCN4_motif	1744	1764	cis-regulatory element involved in endosperm expression
CsGRL10	AACA_motif	1282	1302	involved in endosperm-specific negative expression
CsGRL13	GCN4_motif	250	270	cis-regulatory element involved in endosperm expression
CsGRL2	GCN4_motif	1727	1747	cis-regulatory element involved in endosperm expression
CsGRL23	GCN4_motif	562	582	cis-regulatory element involved in endosperm expression
CsGRL25	GCN4_motif	1727	1747	cis-regulatory element involved in endosperm expression
CsGRL27	GCN4_motif	259	279	cis-regulatory element involved in endosperm expression
CsGRL7	GCN4_motif	1618	1638	cis-regulatory element involved in endosperm expression
CsGRX13	GCN4_motif	944	964	cis-regulatory element involved in endosperm expression
CsGRX15	GCN4_motif	944	964	cis-regulatory element involved in endosperm expression
CsGRX21	GCN4_motif	183	203	cis-regulatory element involved in endosperm expression
CsGRX25	GCN4_motif	800	820	cis-regulatory element involved in endosperm expression
CsGRX25	GCN4_motif	809	829	cis-regulatory element involved in endosperm expression
CsGRX4	GCN4_motif	1491	1511	cis-regulatory element involved in endosperm expression
CsGRX41	GCN4_motif	752	772	cis-regulatory element involved in endosperm expression
CsGRX47	AACA_motif	1681	1701	involved in endosperm-specific negative expression
CsGRX51	GCN4_motif	1922	1942	cis-regulatory element involved in endosperm expression
CsGRX52	GCN4_motif	1922	1942	cis-regulatory element involved in endosperm expression
CsGRX9	GCN4_motif	752	772	cis-regulatory element involved in endosperm expression
CsGRX8	GCN4_motif	901	921	cis-regulatory element involved in endosperm expression
CsGRX26	AACA_motif	1	19	involved in endosperm-specific negative expression
CsGRX28	GCN4_motif	27	47	cis-regulatory element involved in endosperm expression
CsGRX30	AACA_motif	1019	1039	involved in endosperm-specific negative expression
CsGRL2	circadian	1922	1942	cis-acting regulatory element involved in circadian control
CsGRL25	circadian	1922	1942	cis-acting regulatory element involved in circadian control
CsGRX23	circadian	1790	1810	cis-acting regulatory element involved in circadian control
CsGRX24	circadian	1132	1152	cis-acting regulatory element involved in circadian control
CsGRX40	circadian	352	372	cis-acting regulatory element involved in circadian control
CsGRX50	circadian	1040	1060	cis-acting regulatory element involved in circadian control
CsGRX50	circadian	1141	1161	cis-acting regulatory element involved in circadian control
CsGRX51	circadian	893	913	cis-acting regulatory element involved in circadian control
CsGRX52	circadian	894	914	cis-acting regulatory element involved in circadian control
CsGRX54	circadian	1291	1311	cis-acting regulatory element involved in circadian control
CsGRX5	circadian	206	226	cis-acting regulatory element involved in circadian control
CsGRX19	circadian	1191	1211	cis-acting regulatory element involved in circadian control
CsGRX2	circadian	1400	1420	cis-acting regulatory element involved in circadian control
CsGRX3	circadian	1396	1416	cis-acting regulatory element involved in circadian control
CsGRX30	circadian	1901	1921	cis-acting regulatory element involved in circadian control
CsGRX53	circadian	1237	1257	cis-acting regulatory element involved in circadian control
CsGRX58	circadian	1171	1191	cis-acting regulatory element involved in circadian control
CsGRX59	circadian	680	700	cis-acting regulatory element involved in circadian control
CsGRL1	MSA-like	417	437	cis-acting element involved in cell cycle regulation
[truncated: 634 more rows]
