# Supplementary material
Source: MDPI journal article supplement (https://www.mdpi.com/1999-4907/14/8/1647)
Supplement: s1 [file s1 › Table S3.xlsx]

## Sheet: Sheet1
Table S3: Protein 3D model matching parameters for three representative CsGRX genes
Gene	GMQE	Seq Identity	Seq Similarity	Coverage
CsGRX25	0.96	0.8235	0.57	1
CsGRX5	0.97	0.7477	0.54	1
CsGRX3	0.53	0.7982	0.56	0.61
