# Supplementary material
Source: MDPI journal article supplement (https://www.mdpi.com/1999-4907/14/8/1647)
Supplement: s1 [file s1 › Table S4.xlsx]

## Sheet: Sheet1
Table S4: The number of cis-regulatory elements in the CsGRXs promoter region
Gene name	Light responsiveness																											Phytohormone responsiveness												Plant growth and development
	Box 4	G-box	GT1-motif	TCT-motif	GATA-motif	MRE	TCCC-motif	I-box	AE-box	ATCT-motif	Sp1	AT1-motif	chs-CMA1a	GA-motif	LAMP-element	Gap-box	chs-CMA2a	ATC-motif	Box Ⅱ	ACE	chs-Unit 1 m1	3-AF1 binding site	GTGGC-motif	AAAC-motif	CAG-motif	4cl-CMA2b	chs-CMA2b	ERE	ABRE	CGTCA-motif	TGACG-motif	TCA-element	GARE-motif	TGA-element	P-box	TATC-box	AuxRR-core	SARE	TGA-box	ARE	O2-site	CAT-box	CCAAT-box	GCN4_motif	GC-motif	circadian	HD-Zip 3	AT-rich element	RY-element
CsGRX4	3	1	5	1	1		1						3																1															1
CsGRX9	1	1			1	1											1	1											1			1			1					8	1	1		1					4
CsGRX12	1		3		1	2		1								1														1	1	1		1			1			1	1
CsGRX13	2	4		1	1																							3	3	2	2	1								2		1		1
CsGRX14	2		2		1	3		1		1			1			1														1	1	1					1			2	1
CsGRX15	2	4		1	1								1															3	3	2	2	1								2		1		1
CsGRX16	6	2	1	1									1															5	2	1	1									2							1
CsGRX17	3	1	1							1	1	1		1														7	1	2	2										1		1
CsGRX18	4	3						1				1	1															10	2	2	2			1							1		1
CsGRX20	5	2	3						1																				3	6	6	1	2	1					1	6	2		2
CsGRX21	6	2	4	1			1		1																			3	2	7	7		1						1	7	2		1	1			1
CsGRX23	5	2	5	1		1		1		1		1		1														4	1	4	4								1	1	1					1	1
CsGRX24	1				1		1	1	1																			1				3	1							1						1		1
CsGRX25	2		2	1			2							2														4		2	2			2	1					2			1	2			1
CsGRX31	3	2	1	1	2																								2			1	1							3		2						1
CsGRX32			1					2																						2	2		1		1	1	1				1	1	1
CsGRX33	8	2	3	1	1		1																					2	2			1				1				2	1		1		1
CsGRX34	1	6	1	1	1	1		2					1		1	1	1	1										1	4			1		2						5	1	1
CsGRX35	4	2	1	2						1				1															2	3	3	1								1	1
CsGRX36	7	5		2					1													1						2	5	3	3	1
CsGRX37	1	8	1	1	1	2		2					1		1	1	1	1										1	7			2		2						5	1	1					1
CsGRX38	4	2	1	2						1				1															2	3	3	1								1	1
CsGRX39	5	3		1	1	1		1	1						1														3	2	2	1		1						1	1	1
CsGRX40	3	3	1		1	1																						4	2	3	3			1						2	2	1				1
CsGRX41	1	1			1	1											1	1											1			1			1					8	1	1		1					4
CsGRX42	6	2	1								1	1			1													3	2	2	2		1			1				1							1
CsGRX43	5	4	2																									2	3			1								5
CsGRX44	2	3							2		3																		2			1					1	1		1	1		1		2
CsGRX45	2	5							2		1		1			1													5			1				1	1	2		1			1
CsGRX46	2	5							1				2			3													5			1				2		3		1		1
CsGRX47	2	3	2							1										1								1	3	4	4								1	1		1	1
CsGRX49	2			1			2							2														4		2	2			2	1					2			1				1
CsGRX50					1		1	1	2																					2	2	1	1							2						2	1	1
CsGRX51	1		3	2		1						1																				1								1		1		1		1	1
CsGRX52	1		3	2		1						1																				1								1		1		1		1	1
CsGRX54	6	5		1					1																			1	6	2	2			1						1	1					1
CsGRX56	8	2	4	1	1							1																2	2			1				1				1	1		1		1
CsGRX1	1	13	1	1	1	1	2			1									2									1	10	4	4	2	1	1		1				2								1
CsGRX5	5	3	1	1	1		2	1					1							1								4	3	1	1			3			2				3		1			1
CsGRX6	6	1		1	1		4					1	1							1								4	1			1	1	2			1				1		1
CsGRX7	2	2	1		1	3		2			1			1							2								1			1		1						1	1		1
CsGRX8	4	1		1	1																							4	1											2		1		1	1			1
CsGRX29	3	7	1		1															1					1			3	6											10					1			1
CsGRX48	4	1	2	1		1	1	1						1		1		1										6	1	3	3		1							1	1							2
CsGRX55		5			1	2		1			1			1							2								1			2	2							2	1	1
CsGRX2	3		1		1																											1								1	1				1	1
CsGRX3	3		1		1																											1								1	1				1	1
CsGRX10	4	6	2	2		1						2														1		3	6			2		1						9
CsGRX11	6	3	2	1	1				1	1								1										1	3	1	1									4		1
CsGRX19	9	5						1											1									9	3											3						1
CsGRX22	6	1	1	1	1	1					2		1															2	1	2	2							1									1	1
CsGRX26	3	3	4		2	1					1	1			1													4	2	1	1	1	1							4		1
CsGRX27	4	1		1						1	1																	2	1	4	4	1				1				6			1
CsGRX28	1			1	1			1		1					1												1	1		3	3				1					4	1		1	1	1
CsGRX30	1	1	1	3	1							1		1														1	1				1							3	1					1		2
CsGRX53	10	5						1											1									8	3						2					3						1
CsGRX57	5	1	1	2		2	1	1				1										1						2	1	2	2									2
CsGRX58	2	1					1		2																				1	2	2	2	1	1			1			2			1			1		1
CsGRX59	4	1	1				1		1																				1				1	2						2			1			1
CsGRL1	1	4		1						2					1													2	3			1	1	1						1		1	2	1			1	1
CsGRL2	4		2						1																			1		2	2	1		1		1				4		1		1	1	1
CsGRL3	9	1		1					1																			4	2	2	2		1							1					1
CsGRL4	2	3		1	1			3		1																		1	2	6	6	1		1							4	1
CsGRL5		1	4	2		1	1		2	1			1				1				1							1	1			2		1						1					1
CsGRL6	2	2	2		1					1				1								1						1	2	1	1			1	3					1			2
CsGRL7	5	1	3	1								1					1											1	1			2		1						4		1		1
CsGRL8			3	1	1					1	1						1			1										1	1									3	3
CsGRL9			2	1		1				2	1						1							1				1	1	1	1			1		1				5	2				1
CsGRL10	2		1	1										1																2	2		1	2						6
CsGRL11	8		2						1		1					1							1					3												3							1
CsGRL12	9		4								1						1						1					2												3							1
CsGRL13	2	2	1	2		2				1		1																6	1	1	1										2	1		1
CsGRL14	3	3					1	1	1		1																	2	3								1			4		1			2
CsGRL15	3	6					1	1	1		1																	2	5			1					1			3		1			2
CsGRL16	2	5		1	1					1					1			1	1									3	5	1	1				1					1	1	1
CsGRL17	1	5		1	2				1	1					1			1	1									3	5	1	1				1					1		2
CsGRL18	5	2		2		1		1		1			1			1				1									2						1						1	1
CsGRL19	3	1	2	1		1				1						1		1	1	1								1	1	2	2				1				1	2	1	1
CsGRL20	1	1		1			1																					3							1					1		1
CsGRL21	4			2	2	3	1								2													3		1	1				1					1		1	1
CsGRL22	1		3	2			4																					2				1								1	1
CsGRL23	2	1	1	1	1			2	1			1																1	1											6				1
CsGRL24	1		3	2			4	1																				1				1
CsGRL25	3		2									1																2		2	2	1		1		1				4		1		1	1	1
CsGRL26	4	3	6		1		1	1							1													1	2			1	3		1					5		1
CsGRL27	2	2	1	2		2				1		1																5	1	1	1										2	1		1
[truncated: 13 more columns]
