# Supplementary material
Source: MDPI journal article supplement (https://www.mdpi.com/1999-4907/14/8/1647)
Supplement: s1 [file s1 › Table S5.xlsx]

## Sheet: Sheet1
Table S5: Expression profile (FPKM value) of CsGRX genes under cold stress
Gene ID	CK-1	CK-2	CA1_6h-1	CA1_6h-2	CA1_7d-1	CA1_7d-2	CA2_7d-1	CA2_7d-2	DA_7d-1	DA_7d-2
CsGRX9	0	0	0	0	0	0	0	0	0	0
CsGRX31	0	0	0	0	0	0	0	0	0	0
CsGRX39	0	0	0	0	0	0	0	0	0	0
CsGRX40	0	0	0	0	0	0	0	0	0	0
CsGRX41	0	0	0	0	0	0	0	0	0	0
CsGRX43	0	0	0	0	0	0	0	0	0	0
CsGRX54	0	0	0	0	0	0	0	0	0	0
CsGRX51	0	0	0.3	0	0	0	0	0	0.25	0
CsGRX52	0	0	0.3	0	0	0	0	0	0.25	0
CsGRX35	0	0	0.85	0	0	0	0	0	0	0.58
CsGRX38	0	0	0.85	0	0	0	0	0	0	0.58
CsGRX36	0	1.49	0	0	0	0	0	0	0	0
CsGRX16	0	0.68	0	0	0	0	0	0	1.22	0
CsGRX44	0	0	0	0.73	0	0	0	0.66	0.57	0
CsGRX14	0	1.49	0	0	0	0	0	1.55	0	0
CsGRX13	0.33	0.92	0.55	0.41	0.86	0	0	1.15	0	0
CsGRX4	0	0	0	0	0	0	0	0	4.01	3.33
CsGRX45	1.09	0.99	1.12	0	2.23	2.07	0	1.05	0	0.83
CsGRX15	0.84	1.17	0	1.65	1.09	0.45	1.12	4.51	0	0
CsGRX12	0	0	5.11	3.53	0	0	3.16	3.1	0	0
CsGRX23	0.87	1.6	3.61	0	1.78	0.83	1.71	0.85	2.11	2.06
CsGRX46	0	2.75	1.57	4.91	1.57	2.91	0	5.76	1.13	0
CsGRX25	2.47	7.43	0.85	6.18	0	0.79	2.37	1.55	0	13.34
CsGRX49	2.47	7.43	0.85	6.18	0	0.79	2.37	1.55	0	13.34
CsGRX20	10.38	2.08	16.63	27.15	1.11	0.75	1.55	2.85	0	0.59
CsGRX24	13.17	10.41	5.96	11.47	5.11	2.36	7.9	10.08	0	4.64
CsGRX50	13.17	10.41	5.96	11.47	5.11	2.36	7.9	10.08	0	4.64
CsGRX34	13.71	15.92	24.08	51.42	4.44	8.2	9.85	3.22	6.22	14.96
CsGRX33	11.95	5.66	18.98	12.07	17.16	23.92	13.77	13.63	23.22	15.3
CsGRX56	11.95	5.66	18.98	12.07	17.16	23.92	13.77	13.63	23.22	15.3
CsGRX37	13.71	32.05	36.17	51.43	4.44	8.2	0	3.22	6.22	15.01
CsGRX21	21.26	11.99	55.88	49.04	5.91	8.95	5.94	8.83	5.5	2.14
CsGRX47	39.49	33.31	22.73	20.06	18.15	24.07	8.56	5.21	25.03	26.8
CsGRX17	62.97	62.18	268.59	204.53	55.74	52.82	29.71	39.59	3.9	11.58
CsGRX32	18.86	221.25	67.34	75.3	120.72	55.78	98.48	119.23	74.65	85.12
CsGRX42	158.02	153.13	105.53	199.47	114.13	40.94	150.02	240.4	4.81	31.32
CsGRX18	99.66	85.44	450.52	314.12	81.67	95.93	59.84	63.7	211.95	593.37
CsGRX7	0	0	0	0	0	0	0	0	0	0
CsGRX55	0	0.67	0.79	1.56	0.73	0	0.71	0	0	0
CsGRX1	21.24	17.82	24.5	24.79	16.14	17.66	17.74	10.04	22.57	17.98
CsGRX29	28.73	40.62	21.61	19.17	22.75	37.55	16.77	15.83	68.49	49.7
CsGRX8	39.27	55.23	42.33	38.56	43.25	40.8	49.41	38.26	74.14	81.96
CsGRX5	261.17	212.77	138.44	186.2	174.69	191.27	174.99	176.62	0	0
CsGRX48	242.01	239.71	240.48	214.88	173.17	172.3	185.54	184.21	397.87	398.19
CsGRX6	264.03	224.9	342.89	246.78	209.06	169.58	185.25	181.88	401.06	377.99
CsGRX28	0	0	0	0	0	0	0	0	0	0
CsGRX53	0.1	0	0	0	0	0	0	0	0	0
CsGRX19	0	0	0	0.12	0	0	0	0	0	0
CsGRX58	0	0	0	0	0	0	0	0.42	0	0
CsGRX27	0	0	0.57	0	0	0	0	0	0	1.4
CsGRX59	0	0.43	0.87	0.85	0	0.53	0.65	1.86	0	0.52
CsGRX26	4.94	10	7.57	4.79	2.43	4.26	3.65	6.44	5.01	8.89
CsGRX22	27.83	22.54	28.77	24.94	29.43	30.24	29.81	28.8	22.29	24.17
CsGRX57	27.83	22.54	28.77	24.94	29.43	30.24	29.81	28.8	22.29	24.17
CsGRX11	40.97	52.6	57.48	46.34	85.47	69.47	105.99	107.74	13.12	8.72
CsGRX2	102.72	94.87	89.66	100.28	78.8	90.27	89.59	90.61	0.39	0
CsGRX3	159.3	136.76	107.73	113.6	113.39	96.85	106.11	103.47	76.95	67.12
CsGRX30	115.61	108	101.56	110	139.66	118.56	113.21	139.12	90.03	84.42
CsGRX10	129.27	122.66	138.63	137.01	183.96	179.75	162.46	181.21	105.03	97.32
CsGRL25	0.1	0.2	0.11	0.43	0.08	0	0	0	0.39	0
CsGRL18	0.13	0.38	0	0	0.13	0	0	0	0.59	0.49
CsGRL10	0	0	0	0	0	0	0	0	1.5	0.45
CsGRL2	0.11	0	0.45	0.43	0.25	0.13	0.41	0.07	0	0.33
CsGRL22	0.14	0.94	0.29	0	0.28	0.94	0.83	0	0	0
CsGRL19	0.13	0.51	0.14	0	0	0	0.13	0.13	3.7	0.99
CsGRL1	0.45	0.28	0	0.15	0	0.28	0	0.44	2.3	1.91
CsGRL6	0.42	0.8	0.64	0.22	0	0	0	0	3.3	1.57
CsGRL24	0.85	1.09	0.28	0.15	0	0	0.16	0.41	2.44	1.69
CsGRL11	1.42	15.55	1.31	2.25	1.25	1.92	0.43	0.96	0	0
CsGRL12	0.53	1.78	0	0	0	0	0	0	31.14	7.44
CsGRL3	5.59	8.72	3.72	3.12	7.49	9.89	7.05	4.49	5.23	20.28
CsGRL14	7.43	8.43	6.52	11.56	5.64	6.29	3.9	4.46	12.78	15.54
CsGRL15	7.43	8.43	6.52	11.56	5.64	6.29	3.9	4.46	12.78	15.54
CsGRL9	11.87	21.2	9.78	14.01	10.47	11.69	10.81	9.09	0	0
CsGRL5	14.58	19.94	19.95	20.31	5.7	8.46	5.82	7.71	2.31	6.43
CsGRL26	10.07	9.97	13.88	19.25	13.29	13.69	13.21	13.54	12.15	10.03
CsGRL8	18.24	16.75	13.59	11.64	10.08	12.48	9.35	12.65	26.24	32.07
CsGRL4	34.69	21.47	26.59	20.36	37.66	33.39	29.47	34.93	31.8	29.95
CsGRL13	39.84	33.57	36.36	40.92	41.55	52.37	40.59	48.91	2.09	0.5
CsGRL21	30.24	35.44	24.94	21.37	17.41	17.24	17.43	20.51	81.01	72.51
CsGRL23	18.1	18.68	31.87	35.86	42.79	44.3	64.11	56.59	24.72	21.77
CsGRL27	34.98	31.04	24.96	30.8	45.55	35.49	42.47	45.83	40.08	44.65
CsGRL20	32.9	39.39	41.34	34.48	63.93	57.32	76.54	71.93	18.22	19.41
CsGRL16	516.8	327.87	276.46	164.17	386.05	390.34	313.59	304.92	15.86	22.31
CsGRL17	511.32	346.22	175.29	194.29	368.03	370.71	331.61	327.44	210.2	203.51
CsGRL7	472.53	454.65	353.45	426.83	474.02	468.47	398.64	348.01	219.23	202.36
