# Supplementary material
Source: MDPI journal article supplement (https://www.mdpi.com/1999-4907/14/8/1647)
Supplement: s1 [file s1 › Table S6.xlsx]

## Sheet: Sheet1
Table S6: Expression profile (FPKM value) of CsGRX genes under drought stress
Gene ID	CK	PEG-N-24h	PEG-N-48h	PEG-N-72h
CsGRX9	0	0	0	0
CsGRX13	0	0	0	0
CsGRX14	0	0	0	0
CsGRX31	0	0	0	0
CsGRX36	0	0	0	0
CsGRX39	0	0	0	0
CsGRX40	0	0	0	0
CsGRX41	0	0	0	0
CsGRX43	0	0	0	0
CsGRX44	0	0	0	0
CsGRX51	0	0	0	0
CsGRX52	0	0	0	0
CsGRX54	0	0	0	0
CsGRX34	0.57	0	0	0
CsGRX35	0	0.72	0	0
CsGRX38	0	0.72	0	0
CsGRX45	0	1.09	0	0
CsGRX16	1.31	0.83	0.66	0
CsGRX4	2.34	0	0.38	0.36
CsGRX46	0	1.37	2.18	0
CsGRX12	6.71	0	3.43	1.05
CsGRX15	3.59	4.21	5.25	7.01
CsGRX32	6.88	8.85	3.53	8.64
CsGRX47	19.47	16.91	6.07	5.66
CsGRX23	1.48	63.76	8.17	20.67
CsGRX25	31.9	56.06	23.47	23.15
CsGRX49	31.9	56.06	23.47	23.15
CsGRX37	0.57	38.34	42.3	79.88
CsGRX24	36.93	77.62	26.33	44.19
CsGRX50	36.93	77.62	26.33	44.19
CsGRX20	4.97	129.24	52.19	29.03
CsGRX33	59.3	64.77	71.85	87.08
CsGRX56	59.3	64.77	71.85	87.08
CsGRX21	23.52	383.25	138.11	59.41
CsGRX42	200.33	717.27	501.41	661.85
CsGRX18	1517.74	1766.15	1423.73	238.13
CsGRX17	1606.11	2235.99	1693.25	314.42
CsGRX7	0	0	0	0
CsGRX55	0	0	0	0
CsGRX5	0	0	0	0.32
CsGRX29	18.33	4.3	4.76	1.26
CsGRX1	29.55	26.84	17.67	21.44
CsGRX8	270.04	224.45	200.9	197.33
CsGRX48	355.26	234.41	192.58	169.28
CsGRX6	1758.18	825.19	924.11	616.23
CsGRX19	0	0	0	0
CsGRX28	0	0	0	0
CsGRX58	0	0	0	0
CsGRX53	0.12	0	0	0
CsGRX27	0	0	0	0.98
CsGRX26	0.41	0	0.41	1.15
CsGRX59	3.88	4.1	3.58	3.53
CsGRX22	54.9	28.12	30.83	27.89
CsGRX57	54.9	28.12	30.83	27.89
CsGRX2	63.49	28.34	42.42	17.45
CsGRX3	105.61	45.83	41.21	25.22
CsGRX30	69.4	34.51	59.44	57.14
CsGRX11	87.41	49.91	66.49	56.36
CsGRX10	108.25	83.18	89.87	72.22
CsGRL9	0	0	0	0
CsGRL10	0	0	0	0
CsGRL16	0	0	0	0
CsGRL11	0	0	0.06	0
CsGRL6	0.12	0	0	0.11
CsGRL19	0.18	0	0.15	0
CsGRL12	0.74	0	0.06	0
CsGRL18	1.47	0	0	0
CsGRL22	0.48	0.6	0.95	1.24
CsGRL24	0	0.77	0.3	3.32
CsGRL1	0.83	1.84	1.13	6.01
CsGRL13	4.93	5.44	2.73	0
CsGRL20	10.19	1.96	3.2	0.5
CsGRL25	2.33	17.45	9.79	1.46
CsGRL5	8.18	7.2	14.1	9.6
CsGRL27	18.99	3.91	13.12	4.33
CsGRL2	3.45	26.67	13.13	2.8
CsGRL26	6.11	23.48	17.98	22.44
CsGRL4	32.43	13.16	14.32	17.29
CsGRL23	18.2	36.16	24.8	47.49
CsGRL3	96.75	29.89	40.08	2.35
CsGRL14	49.24	47.46	46.24	28.67
CsGRL15	49.24	47.46	46.24	28.67
CsGRL21	48.24	38.24	38.97	49.3
CsGRL17	130.84	12.02	40.55	23.39
CsGRL8	13.3	74.9	62.32	163.82
CsGRL7	218.74	112.44	176.12	134.95
