# Supplementary material
Source: MDPI journal article supplement (https://www.mdpi.com/1999-4907/14/8/1647)
Supplement: s1 [file s1 › Table S7.xlsx]

## Sheet: Sheet1
Table S7: Expression profile (FPKM value) of CsGRX genes in 8 tissues
Gene ID	Aptical bud	Flower	Fruit	Young leaf	Mature leaf	Old leaf	Root	Stem
CsGRX9	0	0	0	0	0	0	0	0
CsGRX36	0	0	0	0	0	0	0	0
CsGRX39	0	0	0	0	0	0	0	0
CsGRX40	0	0	0	0	0	0	0	0
CsGRX41	0	0	0	0	0	0	0	0
CsGRX51	0	0	0	0	0	0	0	0.33
CsGRX52	0	0	0	0	0	0	0	0.33
CsGRX54	0.48	0	0	0.38	0	0	0	0
CsGRX43	0	0.26	0.39	0	0	0	0.3	0.4
CsGRX31	0	0	0.39	0	0	0.8	0.3	0
CsGRX35	0.54	0	0	0	0	0.2	0.44	0.4
CsGRX38	0.54	0	0	0	0	0.2	0.44	0.4
CsGRX13	1.24	0	0	0.18	0.55	0.18	0	0.92
CsGRX15	0.93	1.15	0.05	0.05	0.33	1.27	0	0.73
CsGRX24	0	0	0	0	2.15	2.59	0	0
CsGRX50	0	0	0	0	2.15	2.59	0	0
CsGRX25	0	0	0	0	3.01	2.79	0	0
CsGRX49	0	0	0	0	3.01	2.79	0	0
CsGRX37	0.55	0.67	0	0.47	4.68	0	0	0
CsGRX23	0.43	0	0.94	3.83	0	0.69	11.38	0.46
CsGRX16	12.72	0.61	0.21	2.43	0.22	0.2	5.56	1.01
CsGRX12	1.51	6.53	0.78	0	0	0.55	0	15.43
CsGRX34	0.55	0.67	0	0	10.94	9.1	0	4.53
CsGRX14	1	14.99	0	0	0.86	3.43	0.59	8.02
CsGRX4	26.42	0.09	0	8.77	0	0	4.95	2.64
CsGRX20	19.22	0.51	4.67	8.97	1.32	0	10.95	2.15
CsGRX21	36.54	3.86	5.76	18.86	6.91	0.77	12.14	7.04
CsGRX33	1.75	33.32	22.42	2.46	12.77	6.94	28.53	3.59
CsGRX56	1.75	33.32	22.42	2.46	12.77	6.94	28.53	3.59
CsGRX46	20.1	9.97	34.71	10.58	15.69	8.18	22.96	20.04
CsGRX45	20.61	9.11	41.9	12.1	19.95	8.45	33.88	27.3
CsGRX42	55.41	0.52	0	18.26	12.92	31.89	13.3	67.18
CsGRX44	25.51	12.12	48.88	19.05	22.89	14.92	42.79	30.03
CsGRX32	2.22	22.65	13.27	1.9	107.53	227.44	4.26	27.2
CsGRX47	24.58	772.63	112.29	15.1	35.57	18.43	40.75	63.89
CsGRX17	84.04	38.13	267.8	50.73	30.92	22.89	887.51	31.43
CsGRX18	96.27	19.43	302.57	91.19	41.79	30.68	920.91	43.42
CsGRX7	1.55	0.2	0	0.56	0.45	2.17	0	0.28
CsGRX55	1.18	0.73	0.58	0.8	0.92	0	0.85	0.71
CsGRX1	9.99	13.37	13.21	11.86	16.52	14.62	12.89	14.56
CsGRX29	54.88	5.99	19.85	48.9	39.41	10.87	9.92	27.33
CsGRX48	72.73	67.11	118.11	107.34	115.6	132.9	103.89	119.67
CsGRX8	117.39	126.14	107.15	81.8	101.02	76.67	137.09	105.69
CsGRX6	88.75	114.14	150.97	80	163.53	74.41	163.82	129.74
CsGRX5	82.27	158.56	158.83	65.46	159.81	103.55	145.12	125.77
CsGRX27	0	0	0	0	0	0	0	0
CsGRX19	0.04	0	0	0	0	0	0	0.03
CsGRX58	0	0	0	0	0	0	0	0.13
CsGRX28	0.54	0	0	0	0.12	0.19	0	0
CsGRX53	0.22	0.03	0.11	0.31	0.04	0.03	0	0.24
CsGRX59	0.23	0.77	0	0	0.54	0.13	0.41	0.14
CsGRX26	4.35	5.5	8.33	5.33	5.73	3.63	5.57	7.35
CsGRX22	16.32	20.38	51.47	13.92	41.88	24.66	29.6	30.44
CsGRX57	16.32	20.38	51.47	13.92	41.88	24.66	29.6	30.44
CsGRX2	25.9	27.3	33.46	34.09	76.3	71.05	13.08	25.88
CsGRX3	26.22	28.44	35.89	32.43	73.22	77.81	15.22	26.46
CsGRX11	62.05	111.49	54.82	43.83	82.46	108.61	72.55	61.54
CsGRX30	107.53	26.91	56	166.61	175.21	84.38	18.03	42.84
CsGRX10	147.38	124.75	135.24	132.31	195.21	179.83	128.39	137.3
CsGRL10	0	0	0	0	0	0	0	0
CsGRL24	2.1	2.75	0.72	1.66	0.08	0.42	1.15	1.69
CsGRL22	3.21	3.18	0.91	4.66	0.51	1.22	2.33	1.99
CsGRL25	0.96	9.89	0.57	0.22	0.22	0.19	8.56	0.52
CsGRL2	0.79	16.9	0.77	0.38	0.6	0.15	9.89	0.52
CsGRL6	20.81	0.89	0.07	10.9	0.37	0.07	4.56	7.19
CsGRL1	26.19	0.33	0.05	20.22	0.21	0.05	1.99	6.34
CsGRL18	31.06	0.07	0.2	19.49	0.29	0	4.01	5.12
CsGRL20	5.1	2.14	1.32	10.08	19.31	20.48	1.1	4.84
CsGRL19	31.9	0.04	0.34	21.32	0.59	0.04	4.11	6.69
CsGRL13	7.47	2.38	3.32	16.34	26.13	17.35	0.28	5.02
CsGRL26	17.79	7.92	5.63	15.01	10.06	10.86	9.32	10.86
CsGRL11	21.23	0.56	0.5	63.27	4.33	0.56	0.73	2.34
CsGRL27	15.01	2.38	4.64	23.26	28.6	33.42	2.52	5.02
CsGRL12	38.84	0.11	0.13	97.15	0.53	0	0.12	1.6
CsGRL23	15.14	30.53	11.99	19.92	20.98	38.29	11.3	14.48
CsGRL3	4.56	17.19	7.94	3.28	5.97	23.62	94.31	9.06
CsGRL8	17.7	19.19	23.07	18.77	17.26	18.01	27.34	31.89
CsGRL14	34.71	30.42	30.52	21.42	15.24	8.99	83.01	16.96
CsGRL15	34.71	30.42	30.52	21.42	15.24	8.99	83.01	16.96
CsGRL9	23.73	28.46	42.31	32.52	27.51	21.43	38.06	45.36
CsGRL5	13.91	186.42	11.66	12.65	10.73	5.36	29.39	13.96
CsGRL4	39.06	14.27	115.59	38.83	97.38	39.91	23.87	60.74
CsGRL21	96.87	45.5	87.85	122.82	131.51	60.24	107.57	128.95
CsGRL17	50.13	181.32	148.69	79.17	282.98	286.63	37.17	33.94
CsGRL16	73.03	119.62	171.84	81.27	338.89	293.66	51.25	55.63
CsGRL7	132.45	42.79	64.37	240.53	378.32	253.16	16.64	74.39
