# Supplementary material
Source: MDPI journal article supplement (https://www.mdpi.com/1999-4907/14/8/1647)
Supplement: s1 [file s1 › Table S8.xlsx]

## Sheet: Sheet1
Table S8: Information on conservative motifs in CsGRXs
Number	E-value	Sites	Width	Sequence
motif 1	1.9e-1040	73	30	PAVFIGGKLVGGSDEVMSLHESGELVPLLK
motif 2	7.4e-905	43	41	RLASENPVVIFSKSSCCMCHAIKRLFYGLGVSPAVHELDED
motif 3	3.0e-572	20	50	DRIVVYFTSLRGVRRTYEDCCAVRMILRGFRVLVDERDVSMDSGFREELQ
motif 4	2.0e-281	13	50	DNPVMJYMKGVPDLPRCGFSSLAVRVLKEYNVPLSARNILEBPELKNALK
motif 5	1.5e-210	17	29	GGVCEGCGDARFVPCLNCNGSCKVYSEDE
motif 6	4.8e-142	27	15	GRELERALLRLGCNP
motif 7	2.1e-136	6	42	AAGSFNHHGMRYSTTVPNDPDTHEDFMPTNKLQNSDLSLKDI
motif 8	2.1e-133	17	15	CPECNENGLIRCPIC
motif 9	6.8e-076	7	30	HFLRVEAEEQPEISEAYSVSAVPCFVFFKB
motif 10	1.6e-087	4	50	MGGSVKDVQSKGELDSVIGDGSPVIJHFWAFWCDASKQMDQLFSHLSTDF
