# Supplementary material
Source: MDPI journal article supplement (https://www.mdpi.com/1999-4907/14/8/1647)
Supplement: s1 [file s1 › Table S9.xlsx]

## Sheet: Sheet1
Table S9 Primers used in this study
Primer name	Forward primer (5’-3’)	Reverse primer (5’-3’)
CsGRX17	CGACGAAGACGATGAGACTAG	AACAACTGACCTCCGATGAAC
CsGRX21	GTGGTGAAGAGGTTGCTATTGG	TCATCGCCGCCGTGAATT
CsGRX6	CAATCCAGTCGTCGTCTTCAG	CCAGTCCACTCAAGCAATGC
CsGRX29	TCCCTCACCATTATTCCCGTCCTT	CGAGAGCCGAAAGAAGCAGACAT
CsGRX3	CGGCGTGTGCTTTGGCTTT	GCAGTAGGGATGGGGAAGGG
CsGRX11	TGGAGGAGAAGACTCACTGCTCAG	TGCCTTTGTAGCGGAATCGGAAG
CsGRL3	GGAGTGATTGAGGCGAAGAC	CTACGGTGGTGATGATGAACAG
CsGRL8	GGGAGGTACATTGGAGGGGC	AGGGAACGAACCTCGCATCC
GAPDH	TTGGCATCGTTGAGGGTCT	CAGTGGGAACACGGAAAGC
